# Supplementary material for: Unprecedented Elimination Reactions of Cyclic Aldols: A New Biosynthetic Pathway toward the Taiwaniaquinoid Skeleton
Source: MDPI journal article supplement (doi:10.3390/molecules28041524), 2023-02-04

## **Supporting Information**

### **Unprecedented Elimination Reactions of Cyclic Aldols: A New Biosynthetic Pathway toward the Taiwaniaquinoid Skeleton**

Juan J. Guardia <sup>1</sup>, Antonio Fernández <sup>1</sup>, José Justicia <sup>1</sup>, Houda Zentar <sup>1</sup>, Ramón Álvarez- Manzaneda <sup>2</sup>, Enrique Álvarez-Manzaneda <sup>1</sup> and Rachid Chahboun <sup>1,\*</sup>

<sup>1</sup>*Departamento de Química Orgánica, Facultad de Ciencias, Instituto de Biotecnología, Universidad de Granada, 18071 Granada, Spain.*

<sup>2</sup>*Área de Química Orgánica, departamento de Química y Física, Universidad de Almería, 04120 Almería, Spain*

\* *Correspondence: rachid@ugr.es*

#### **Table of Contents**

|                                                |      |
|------------------------------------------------|------|
| <sup>1</sup> H and <sup>13</sup> C NMR Spectra | 2-43 |
|------------------------------------------------|------|

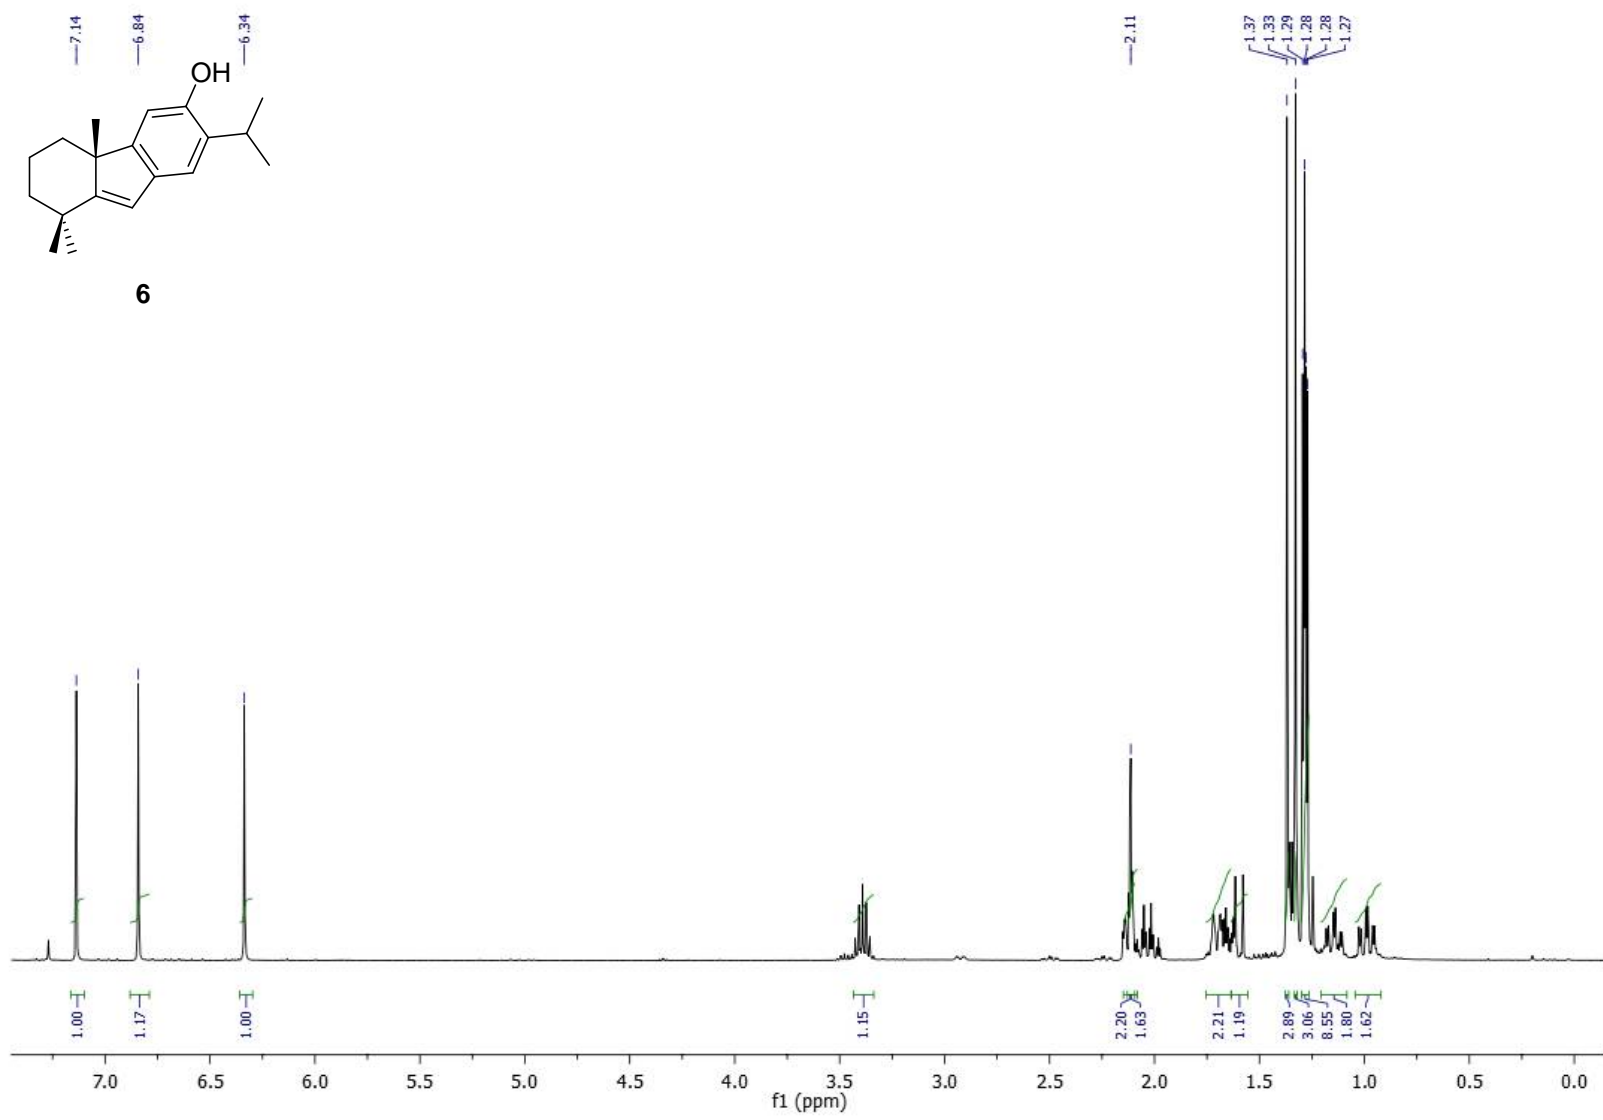

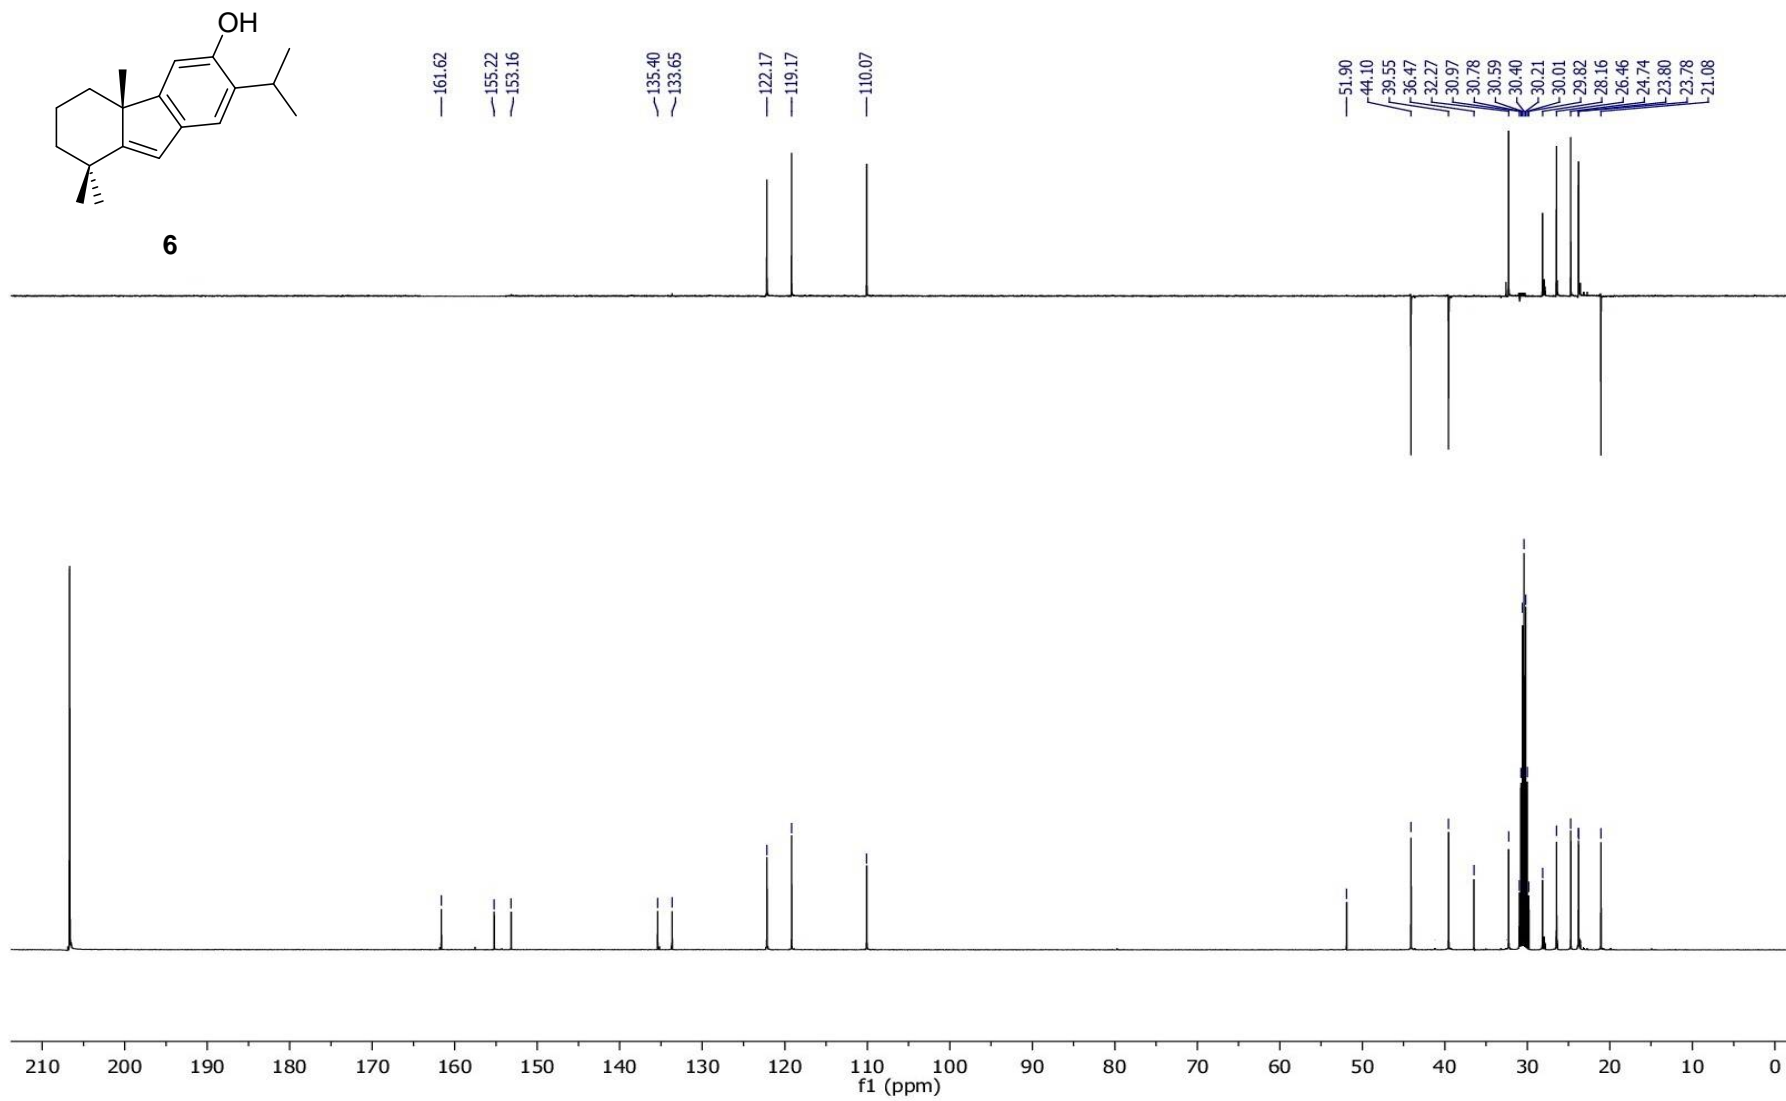

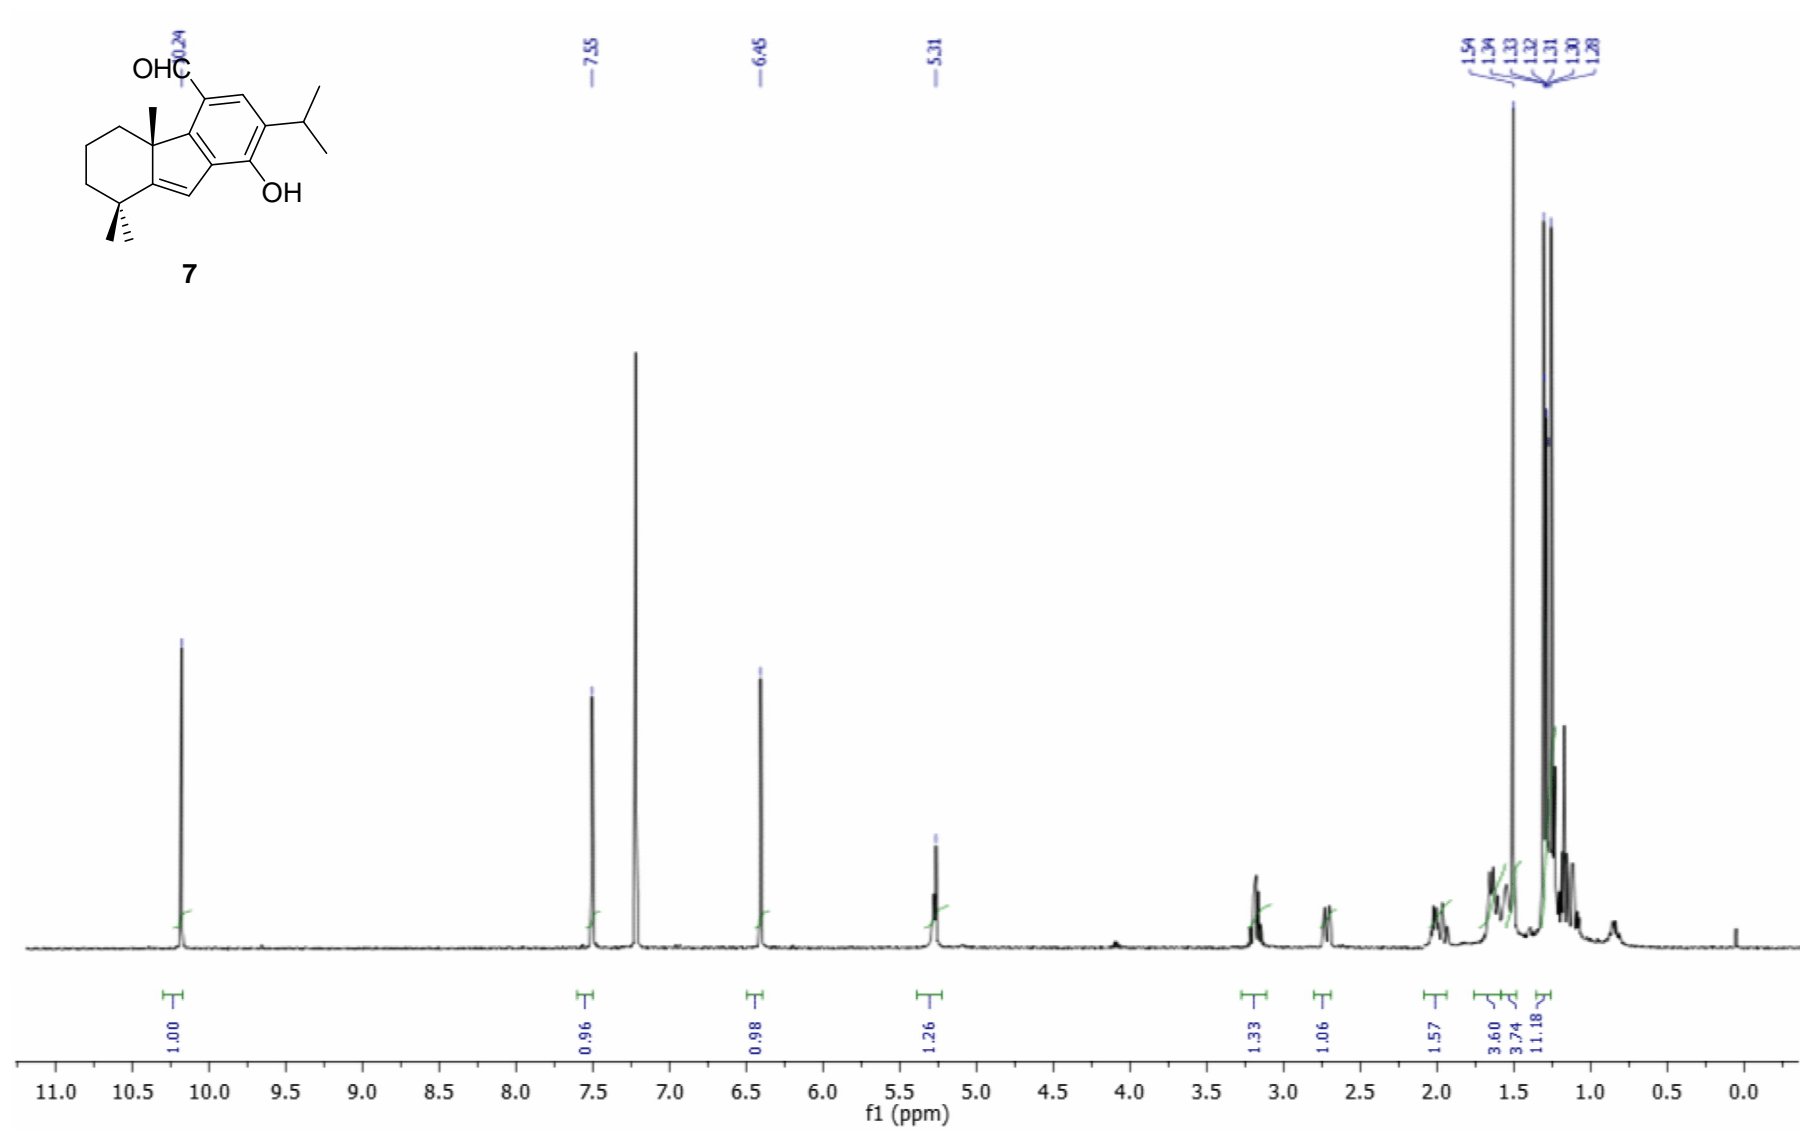



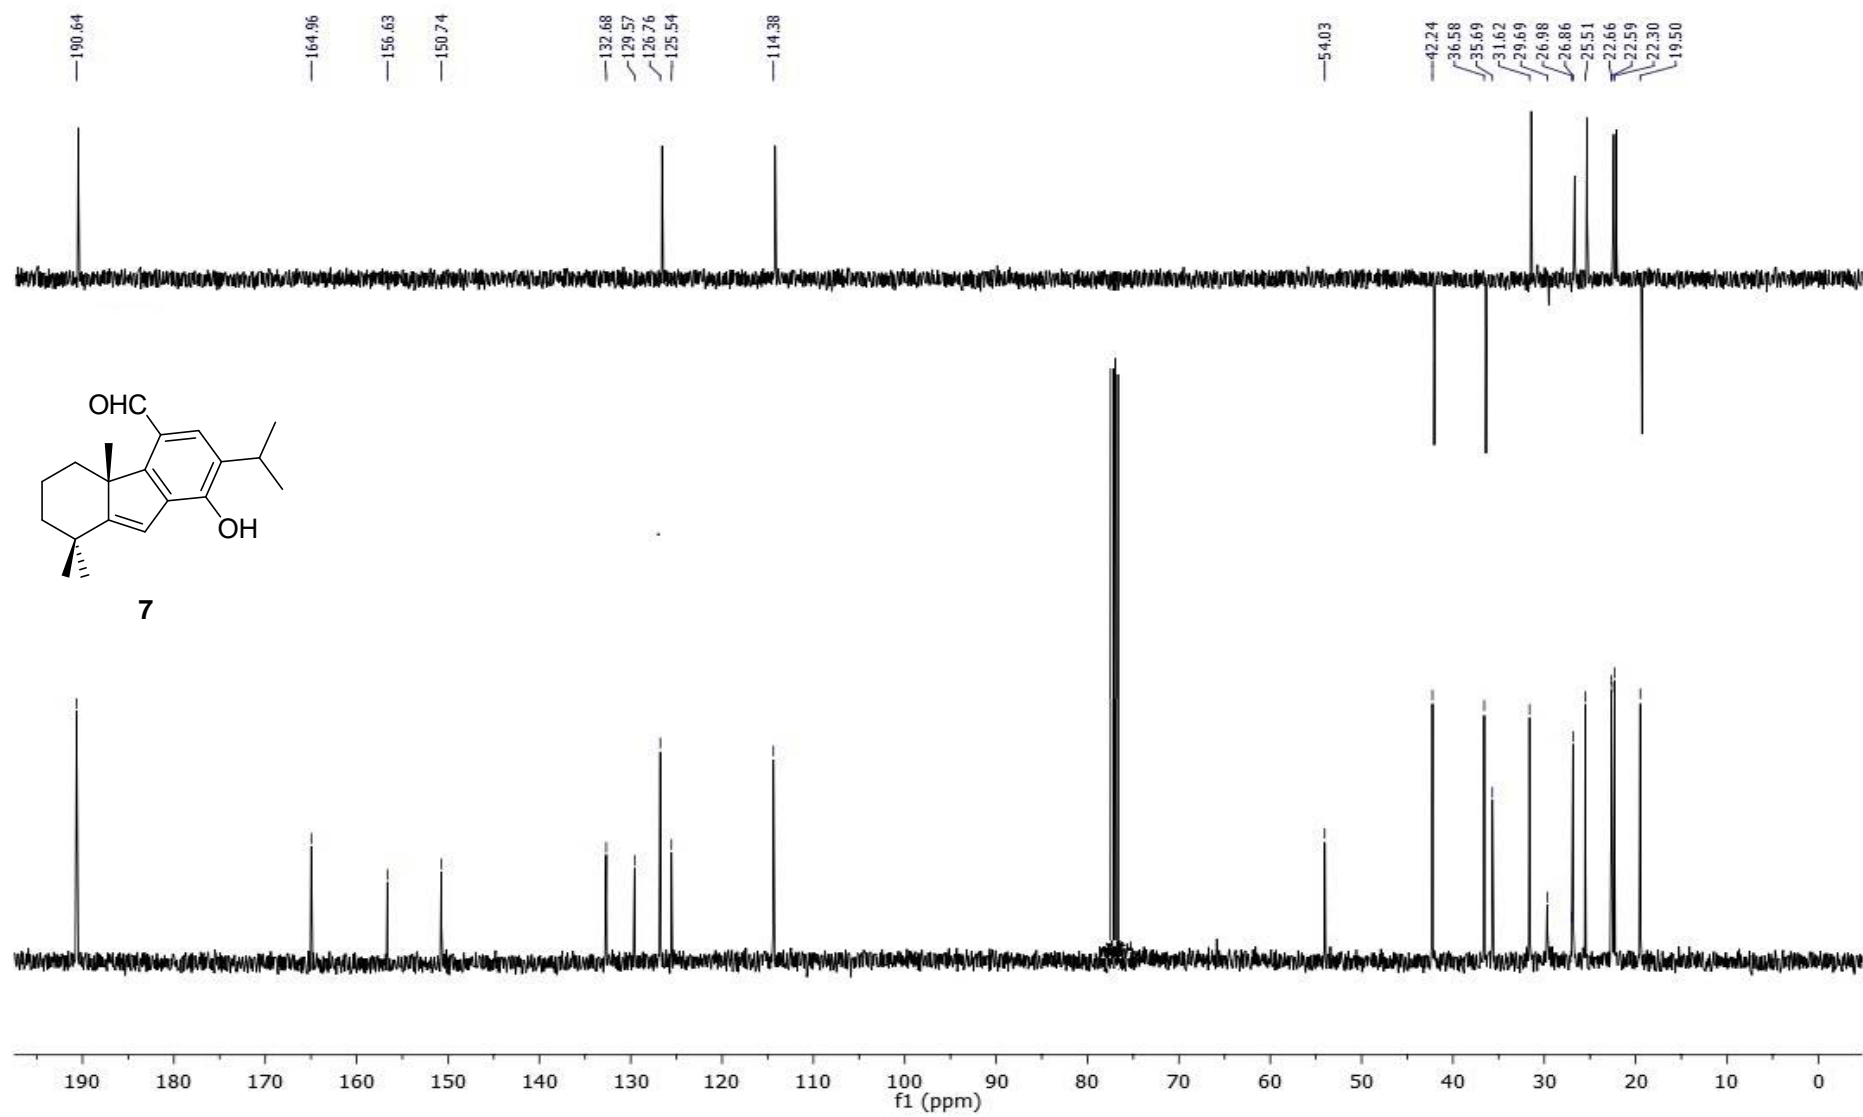

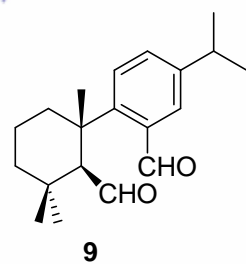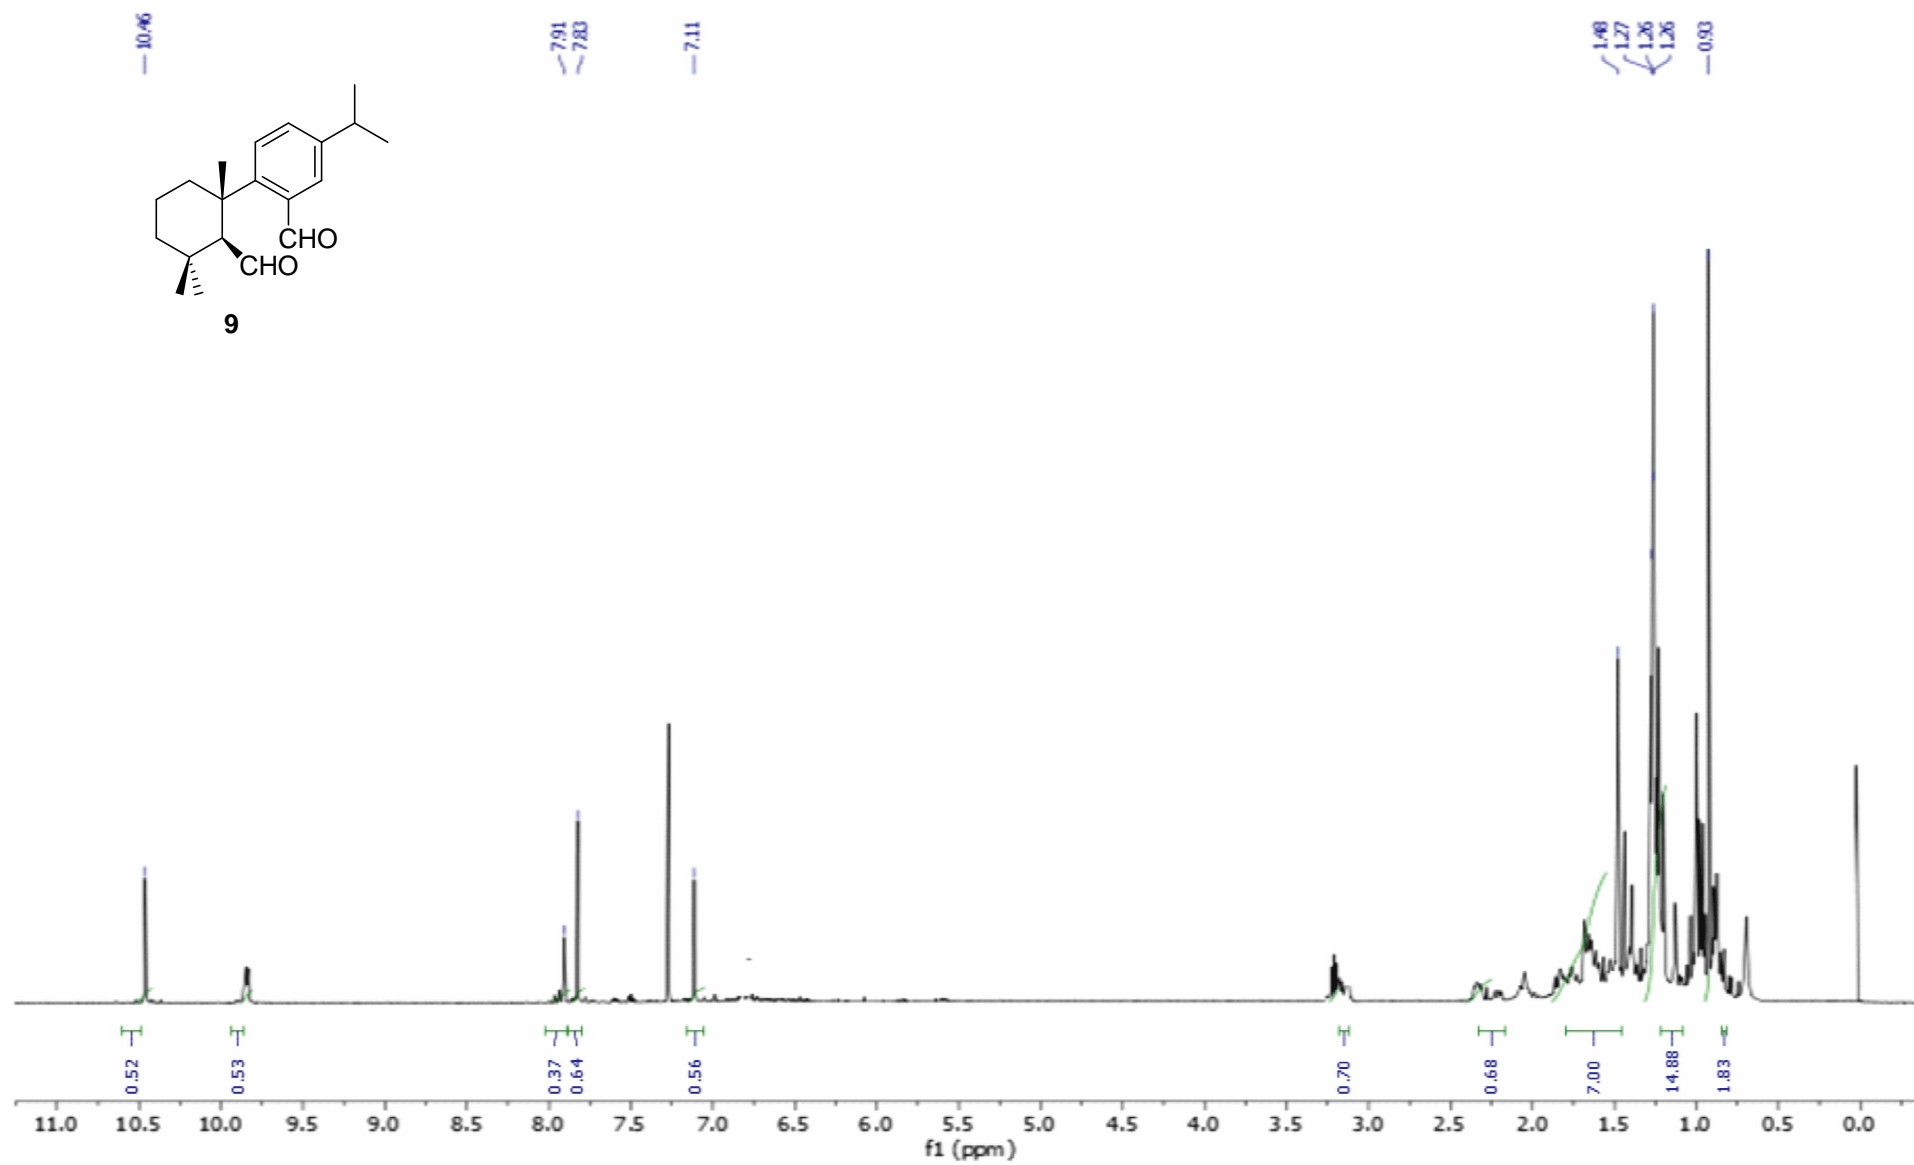

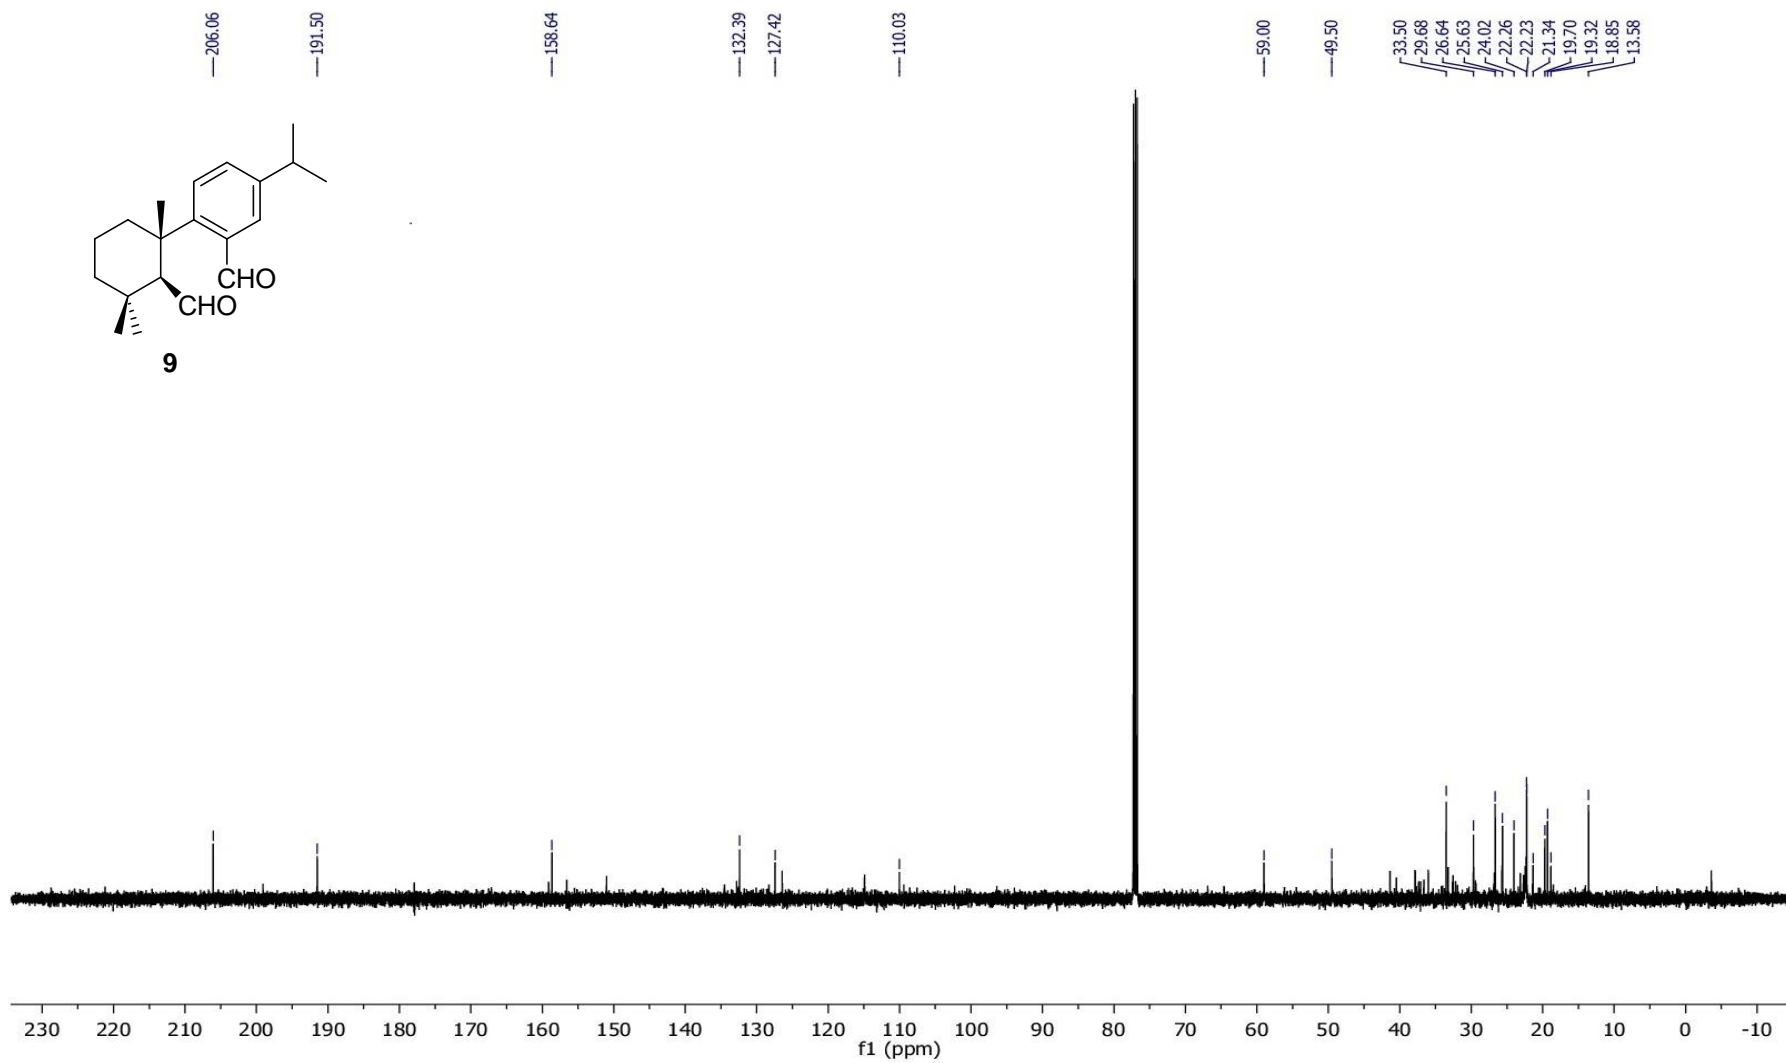

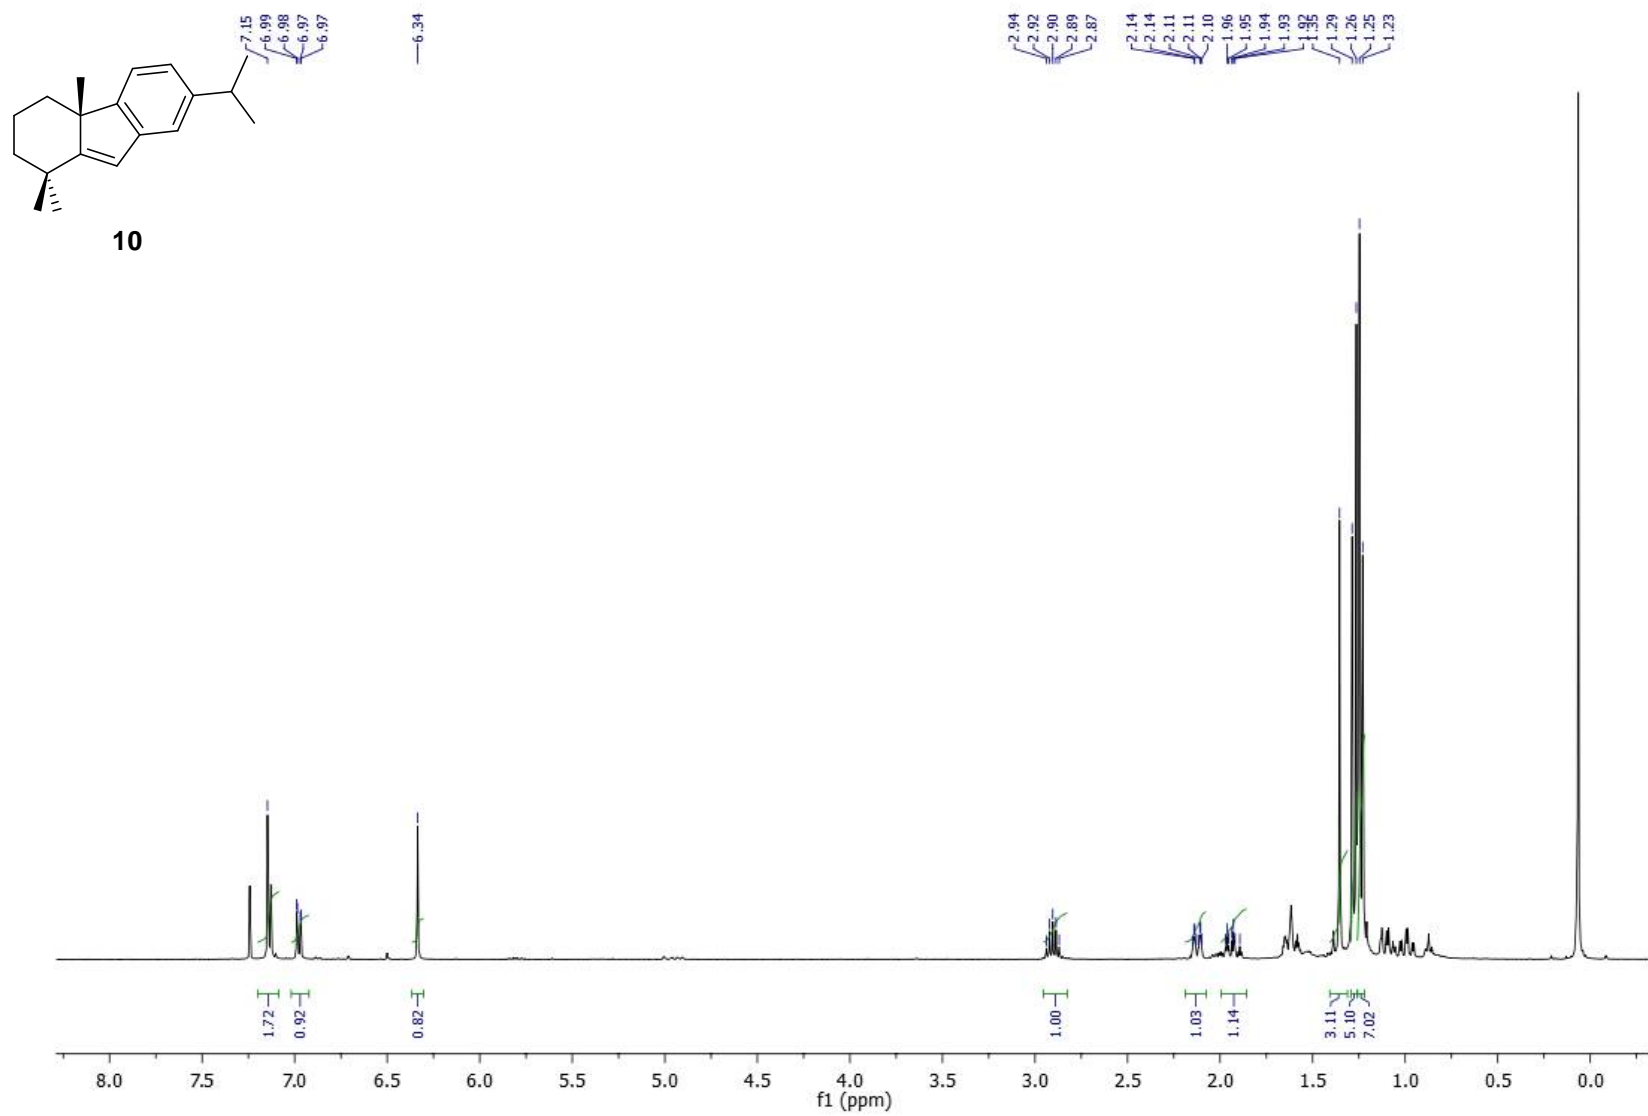

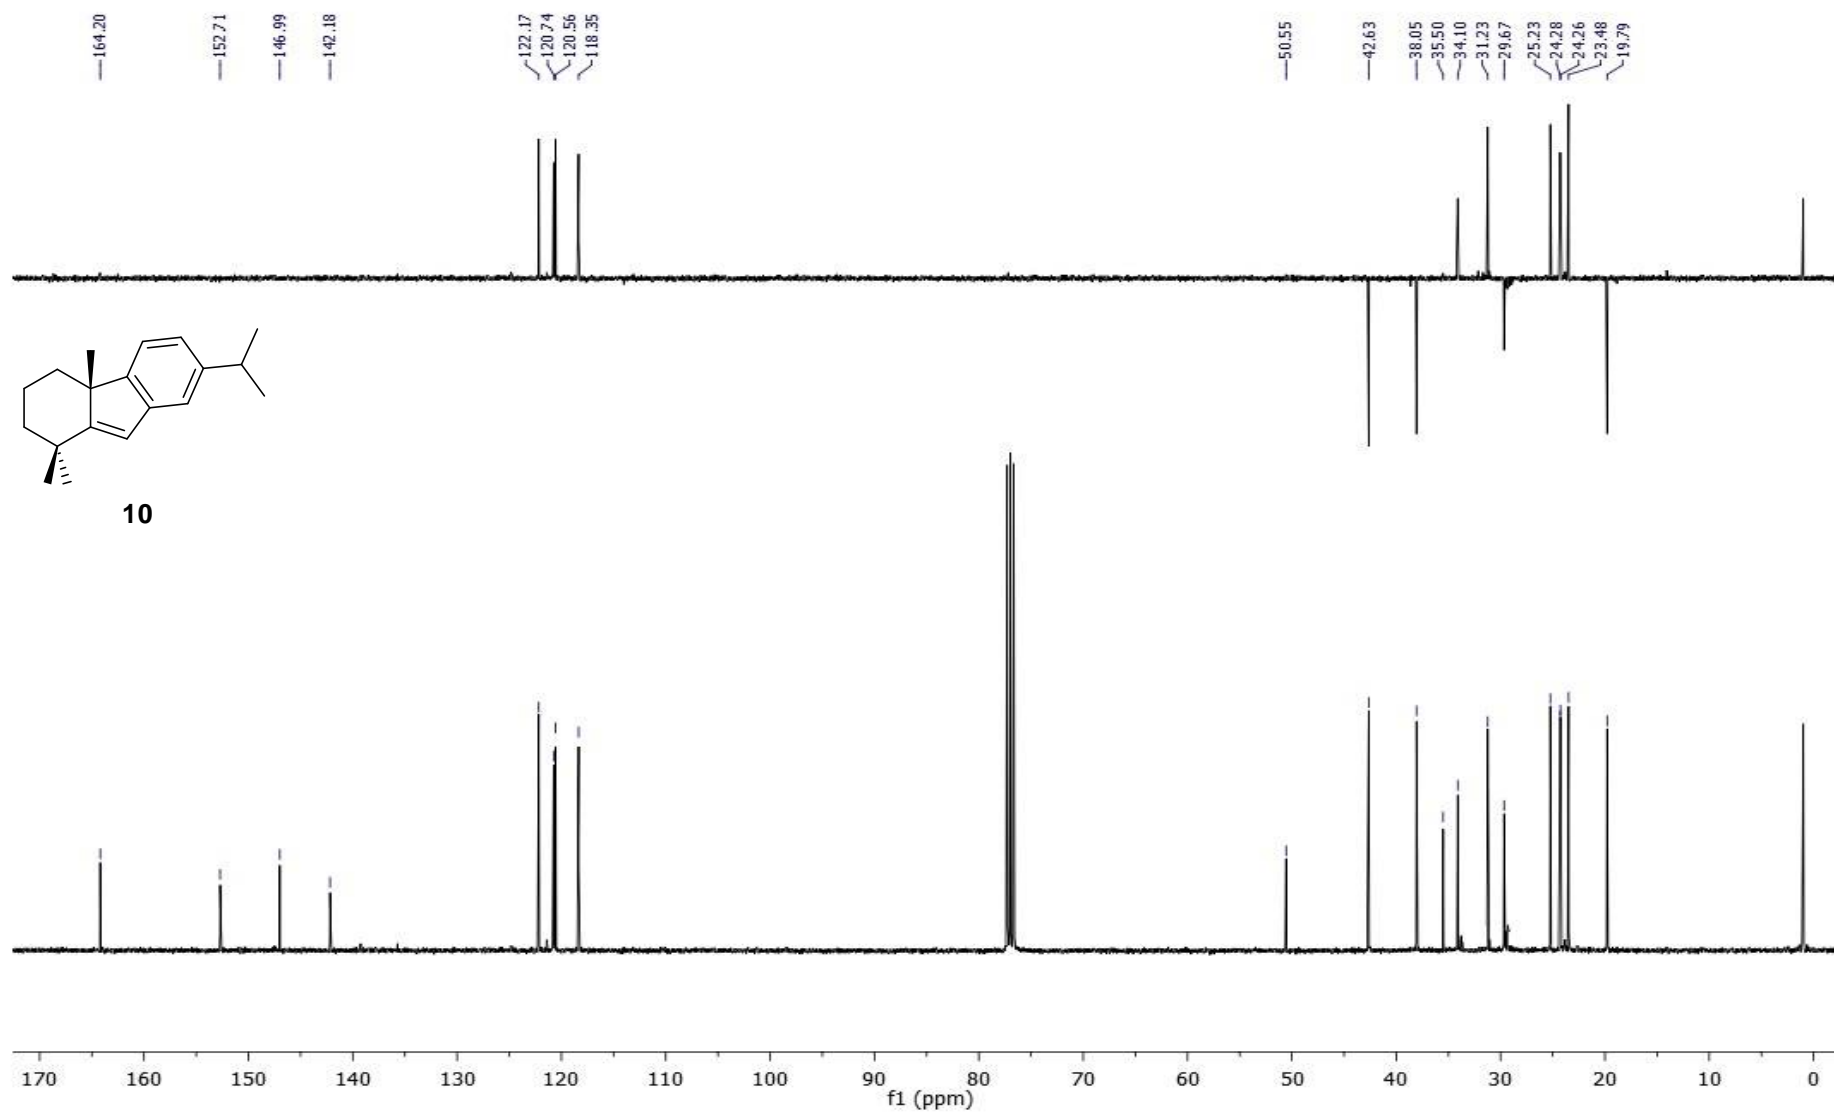

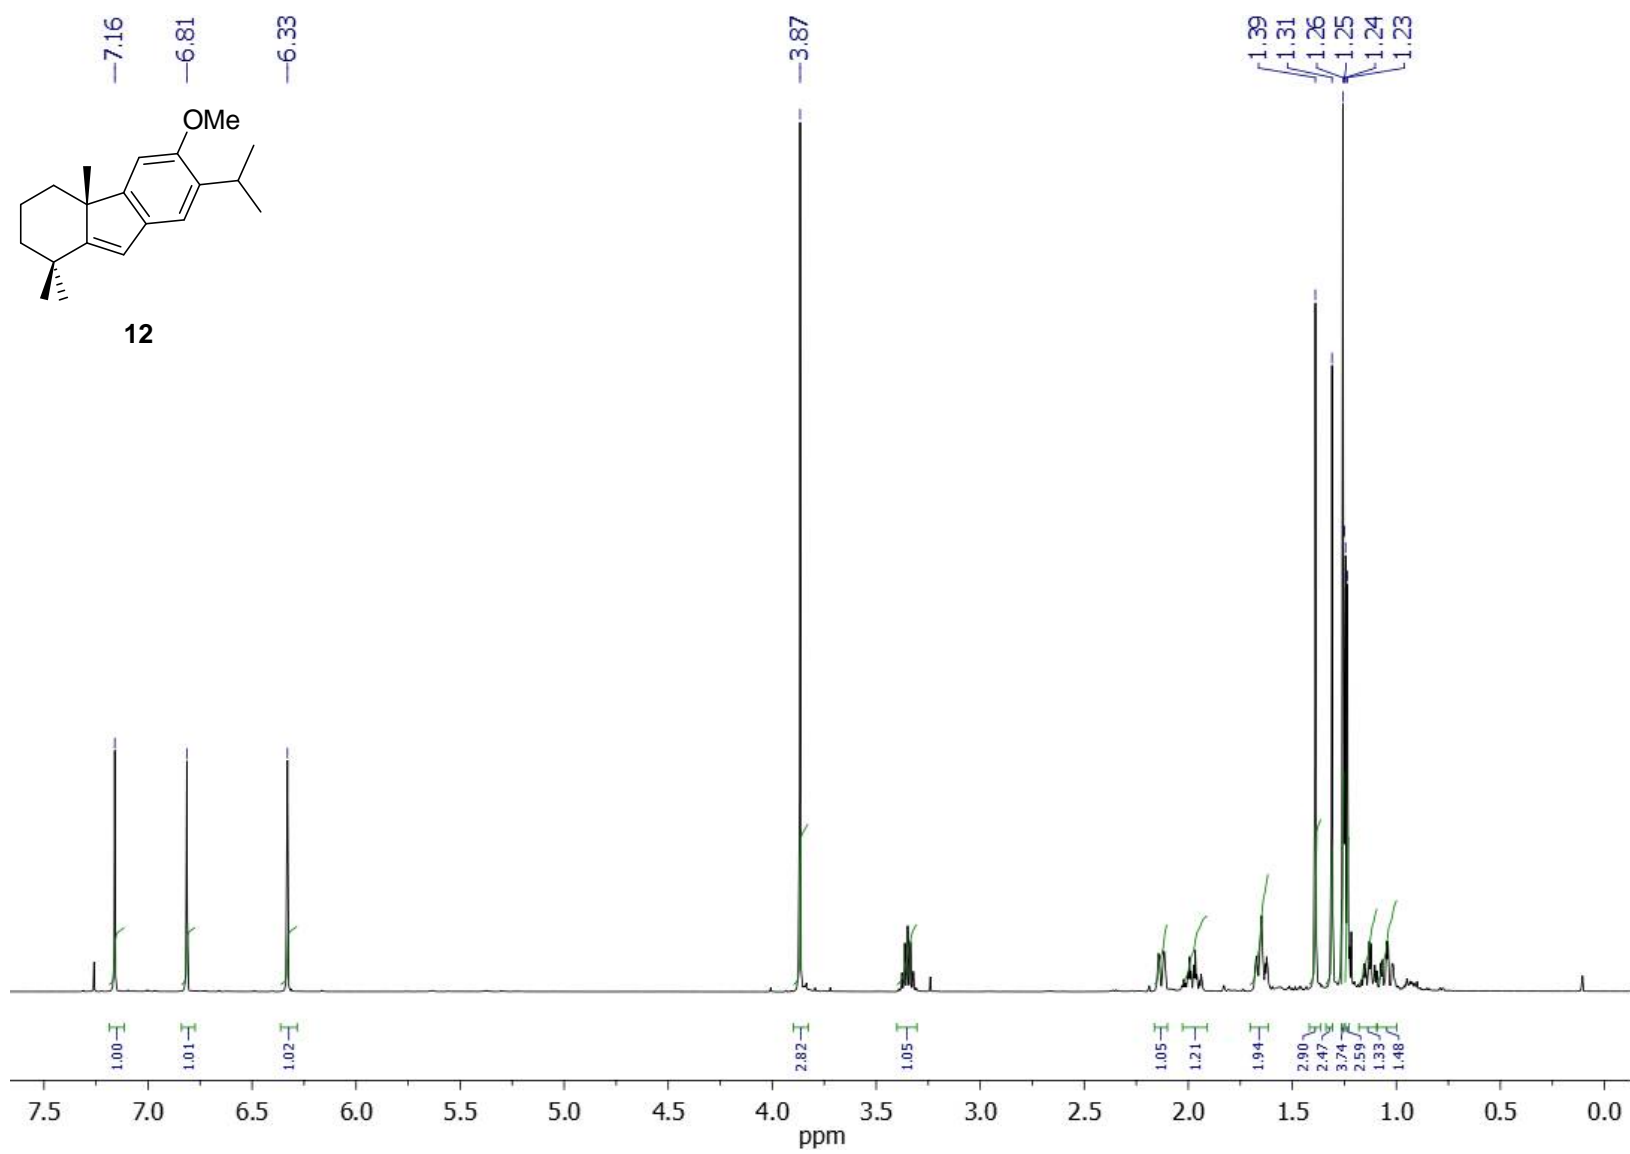

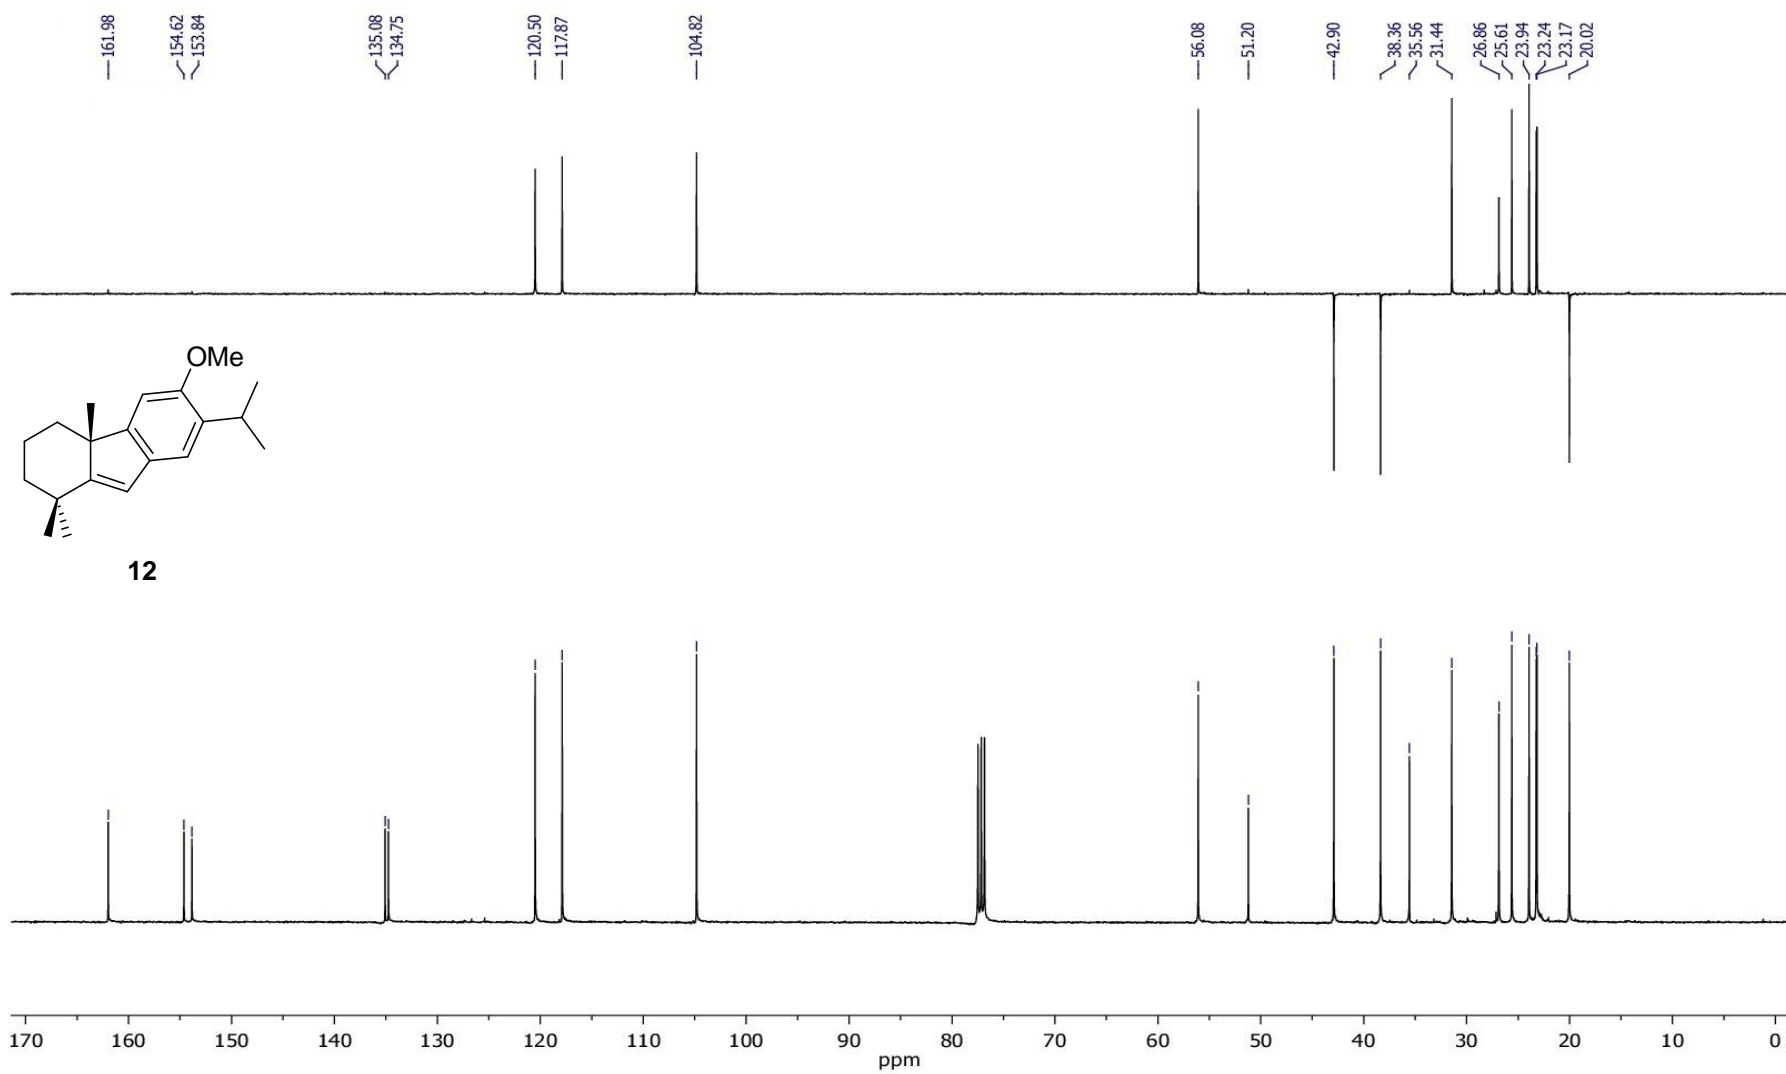

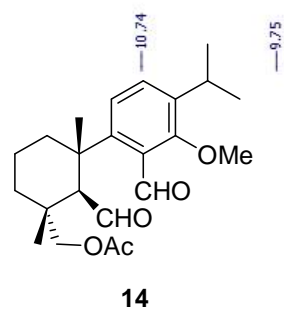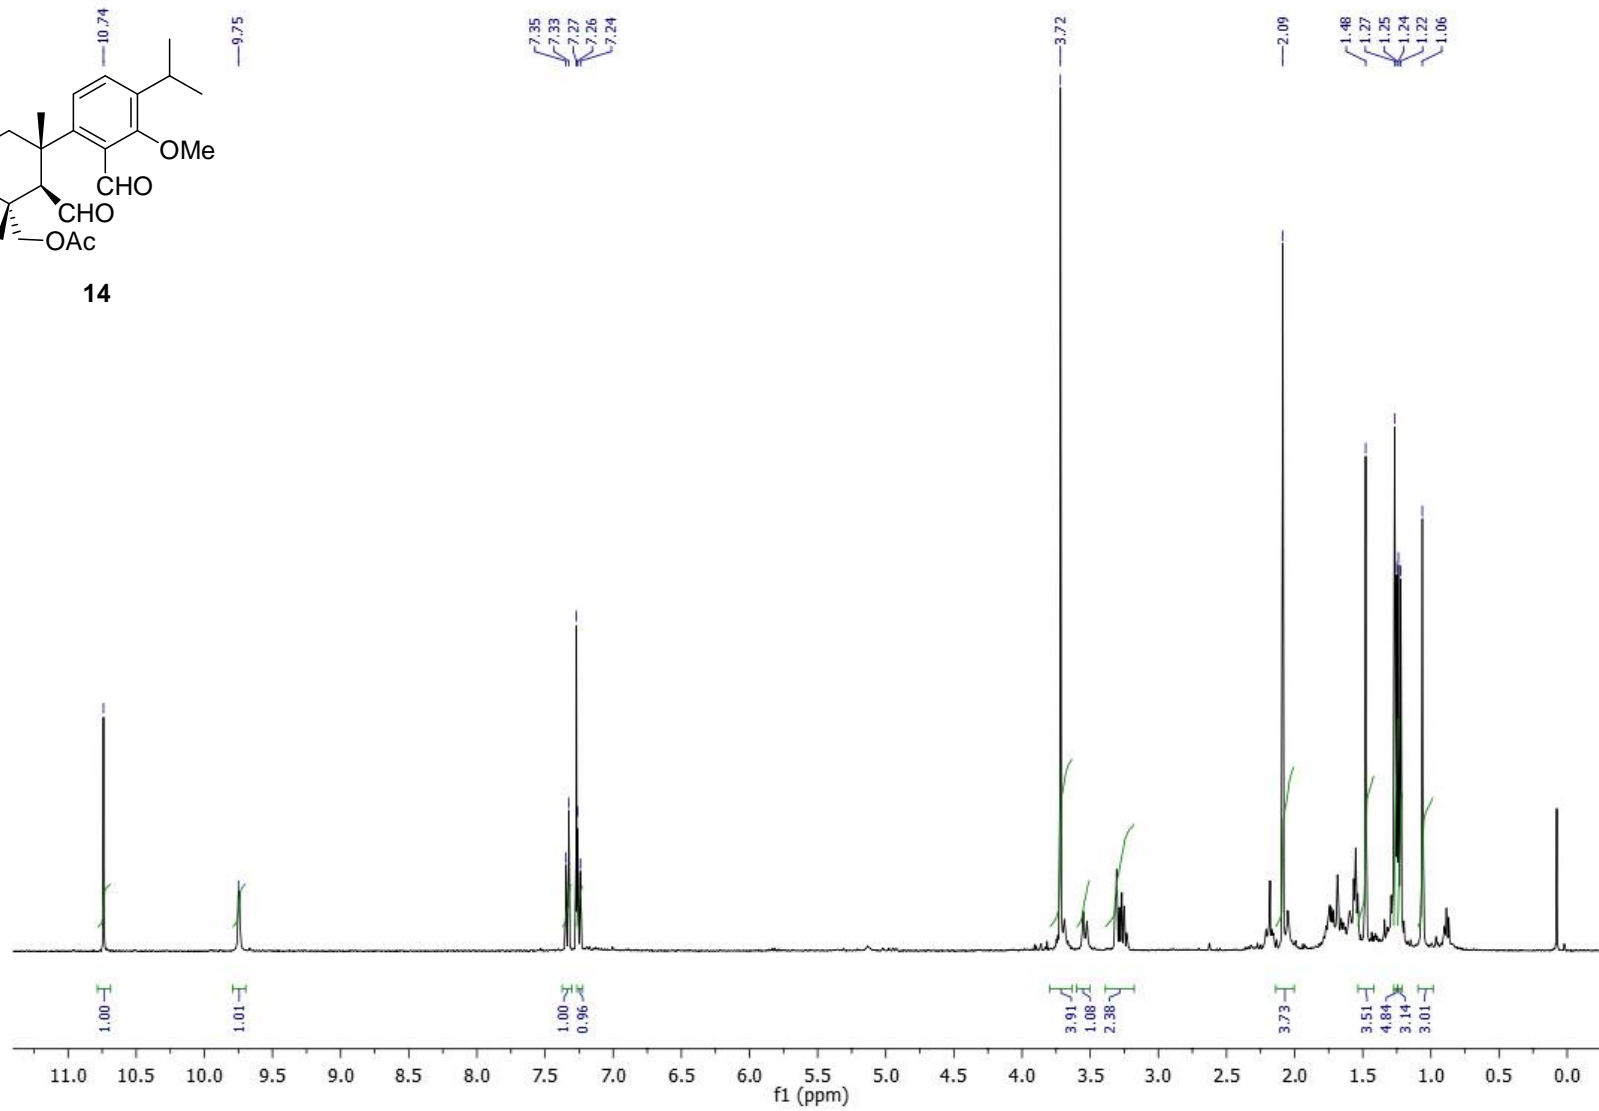



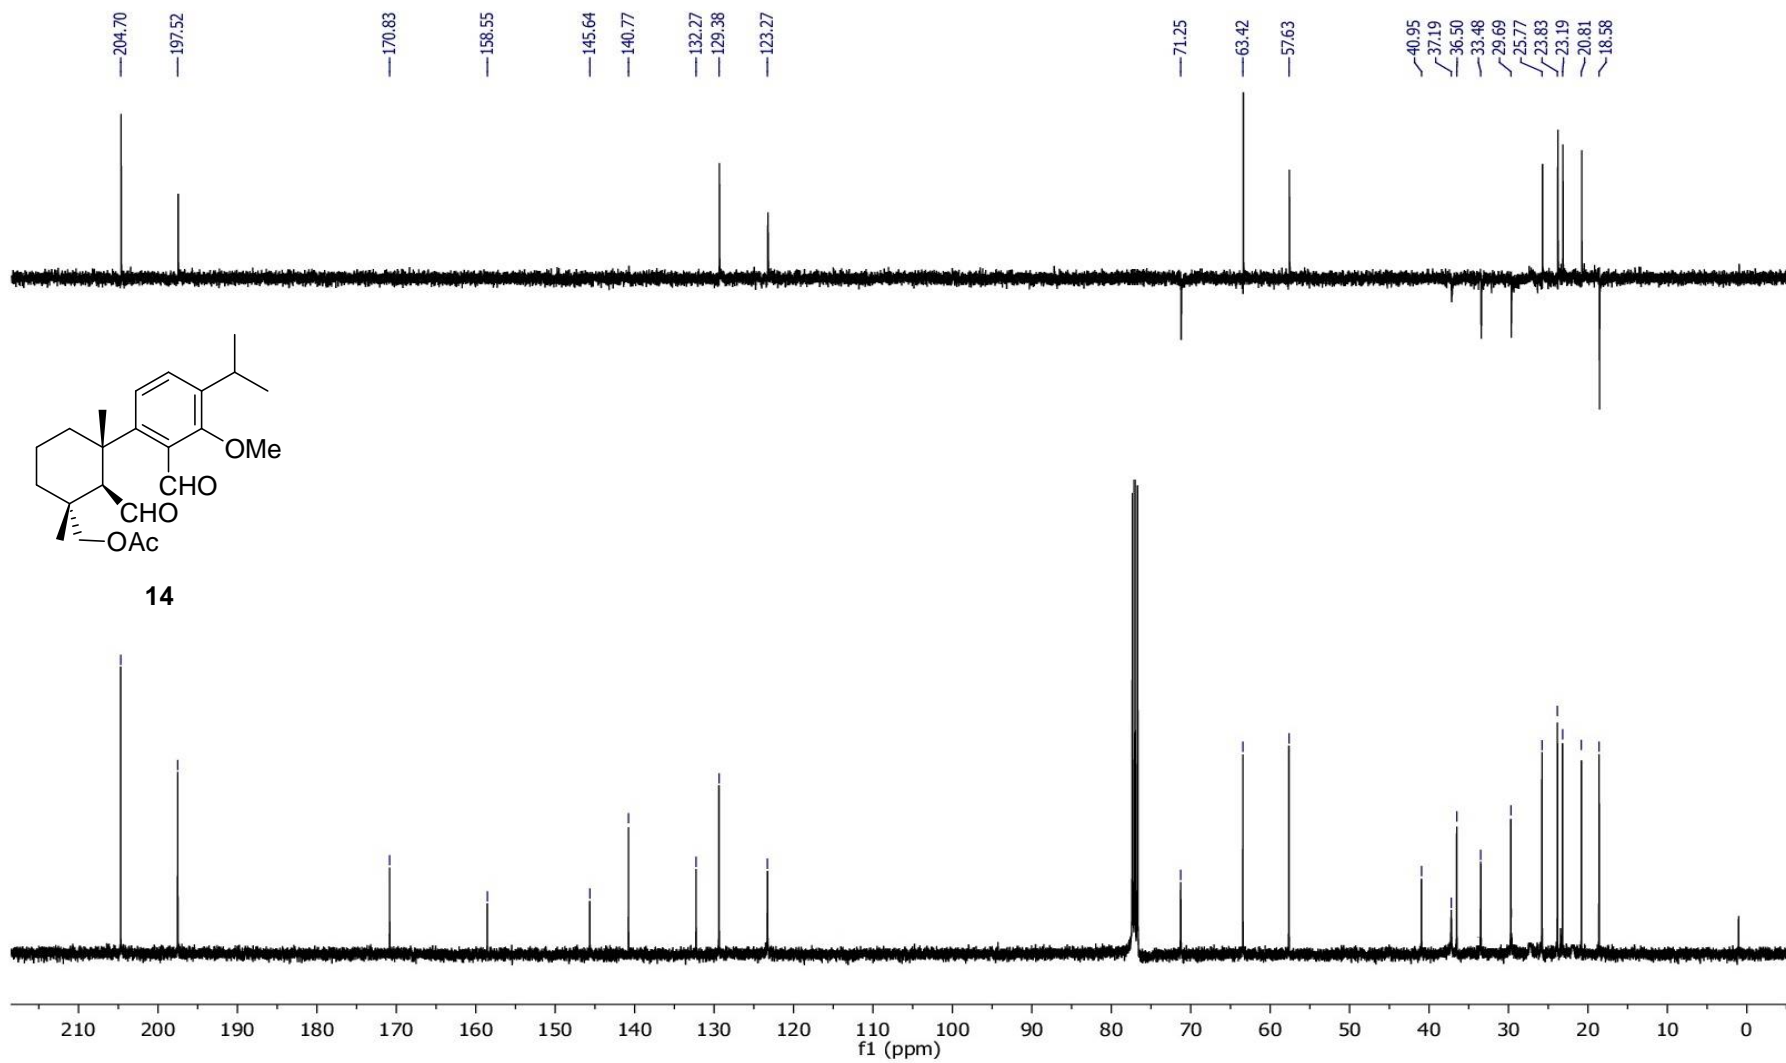

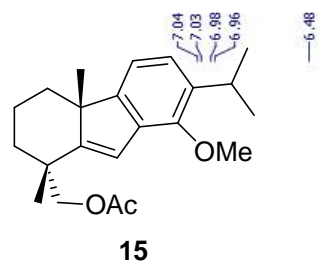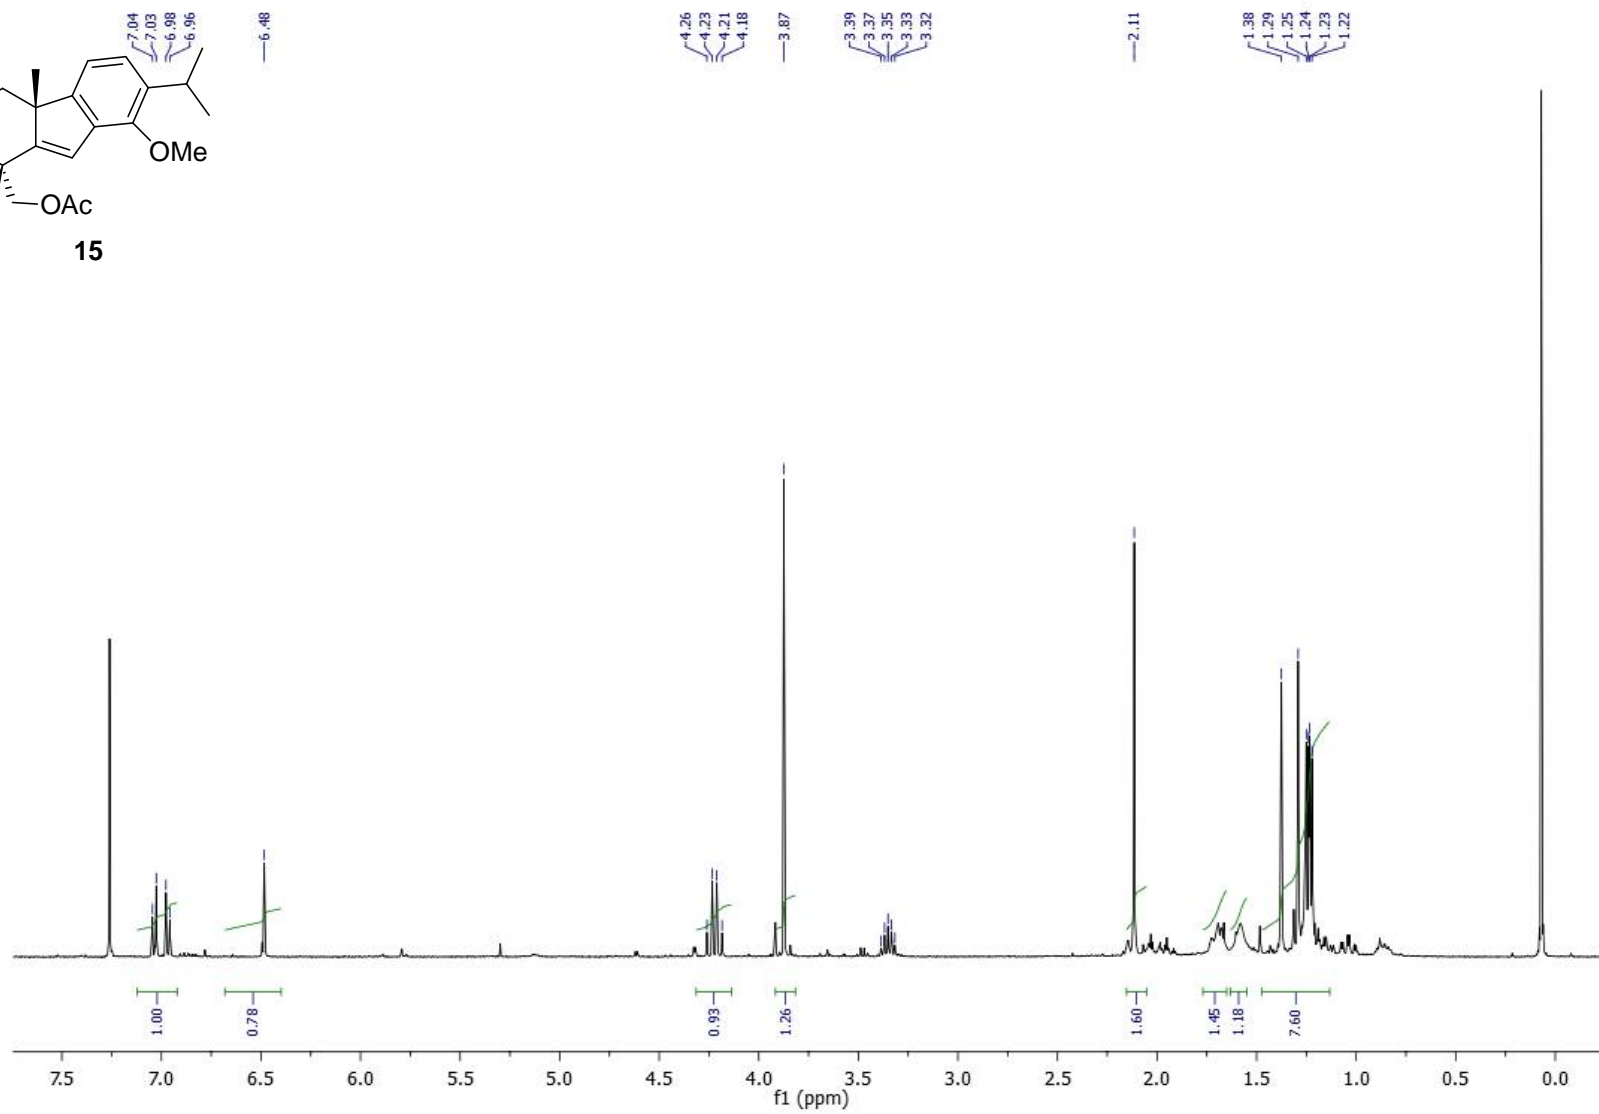

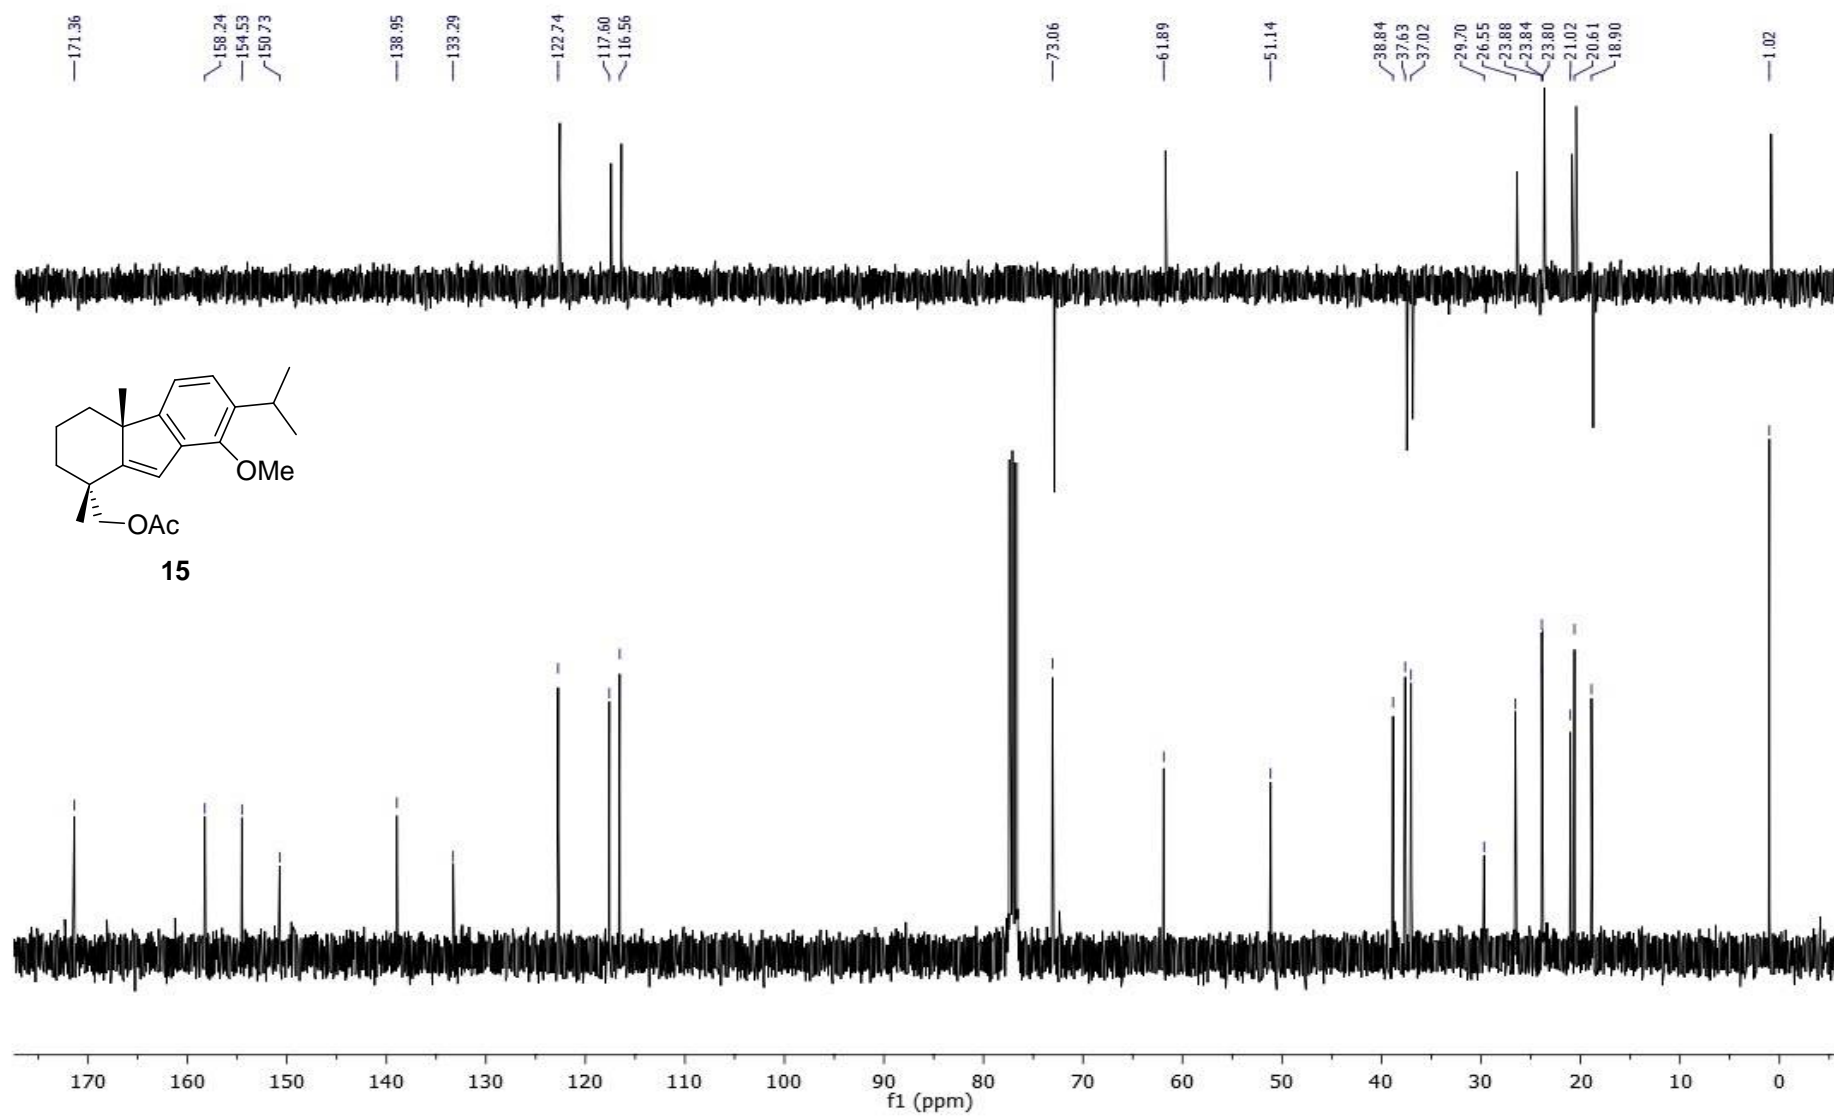

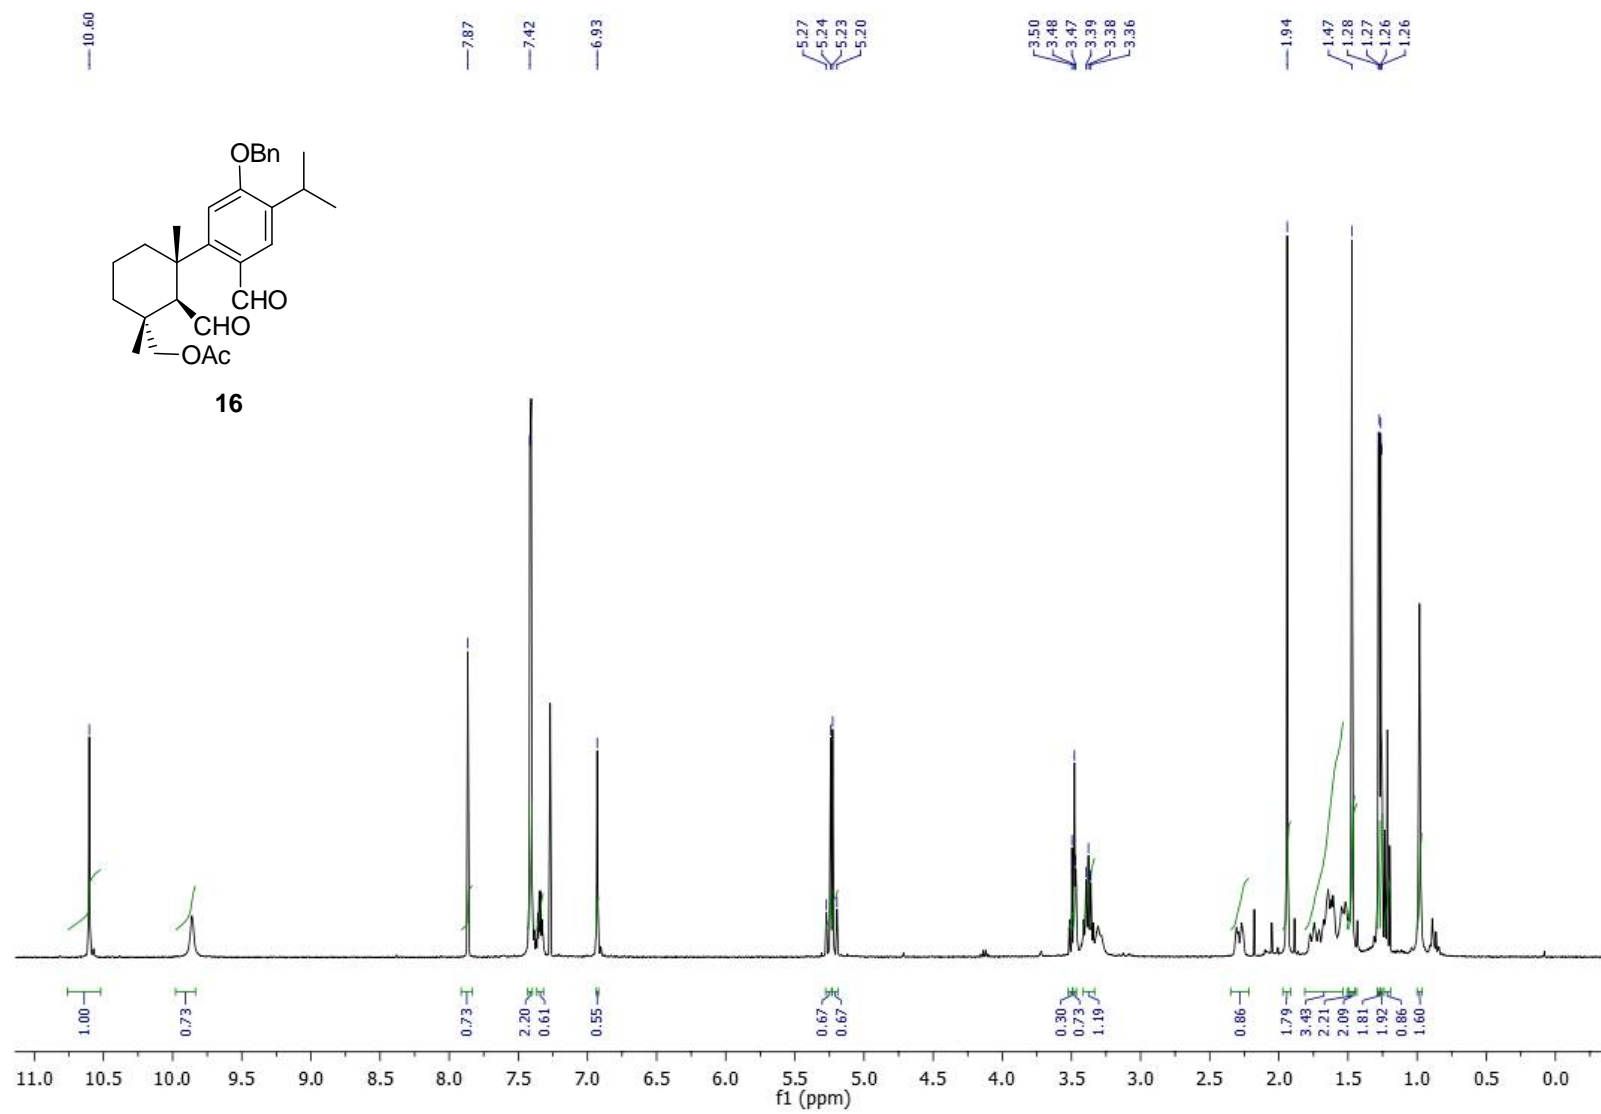

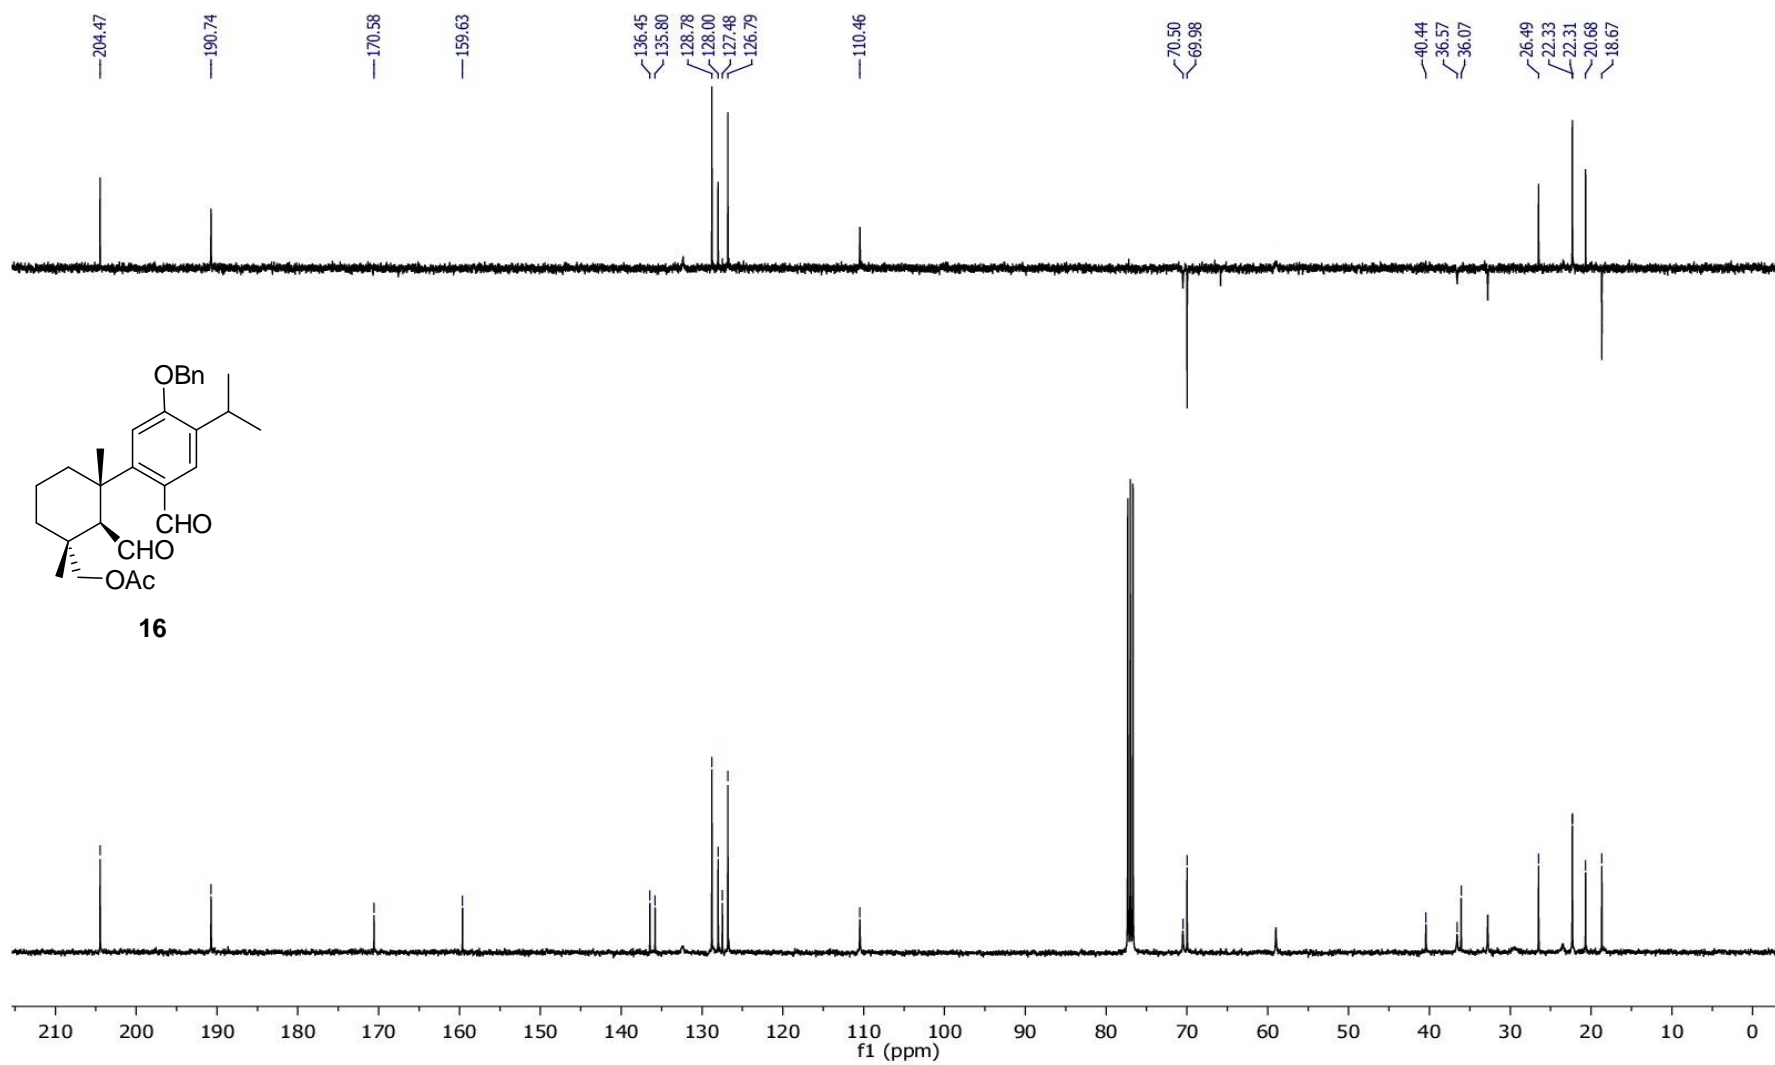

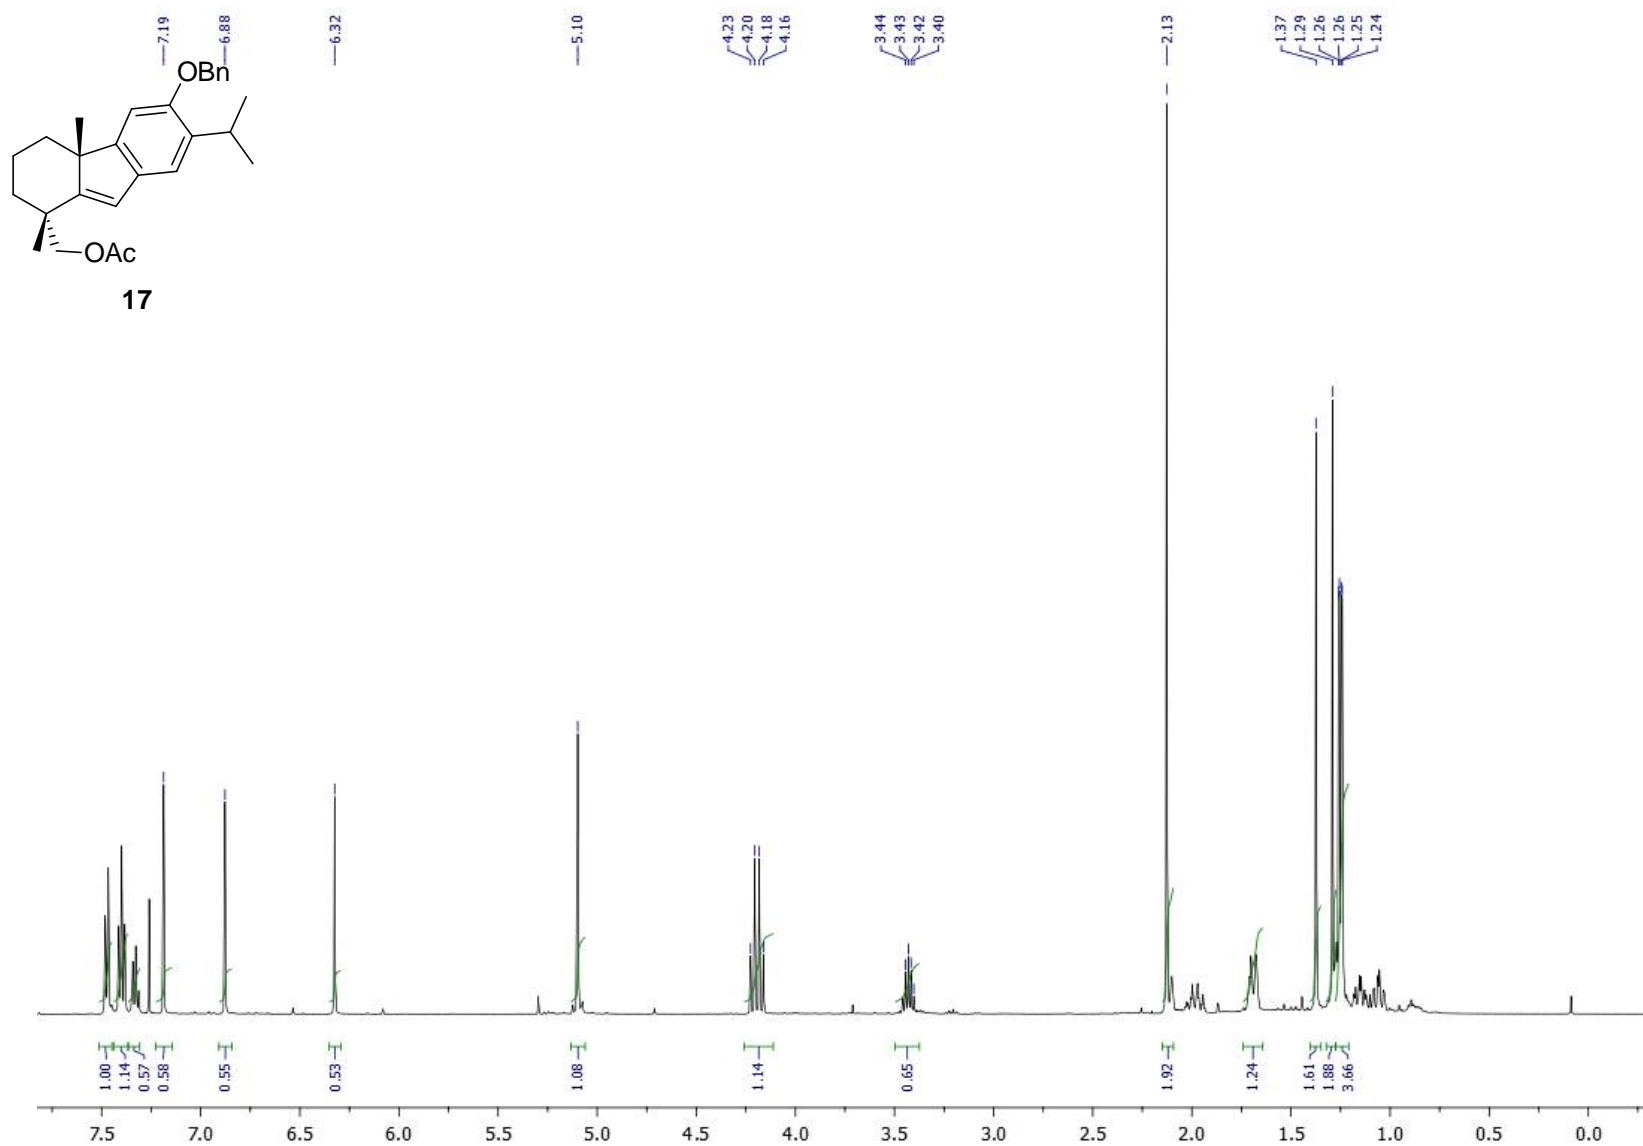

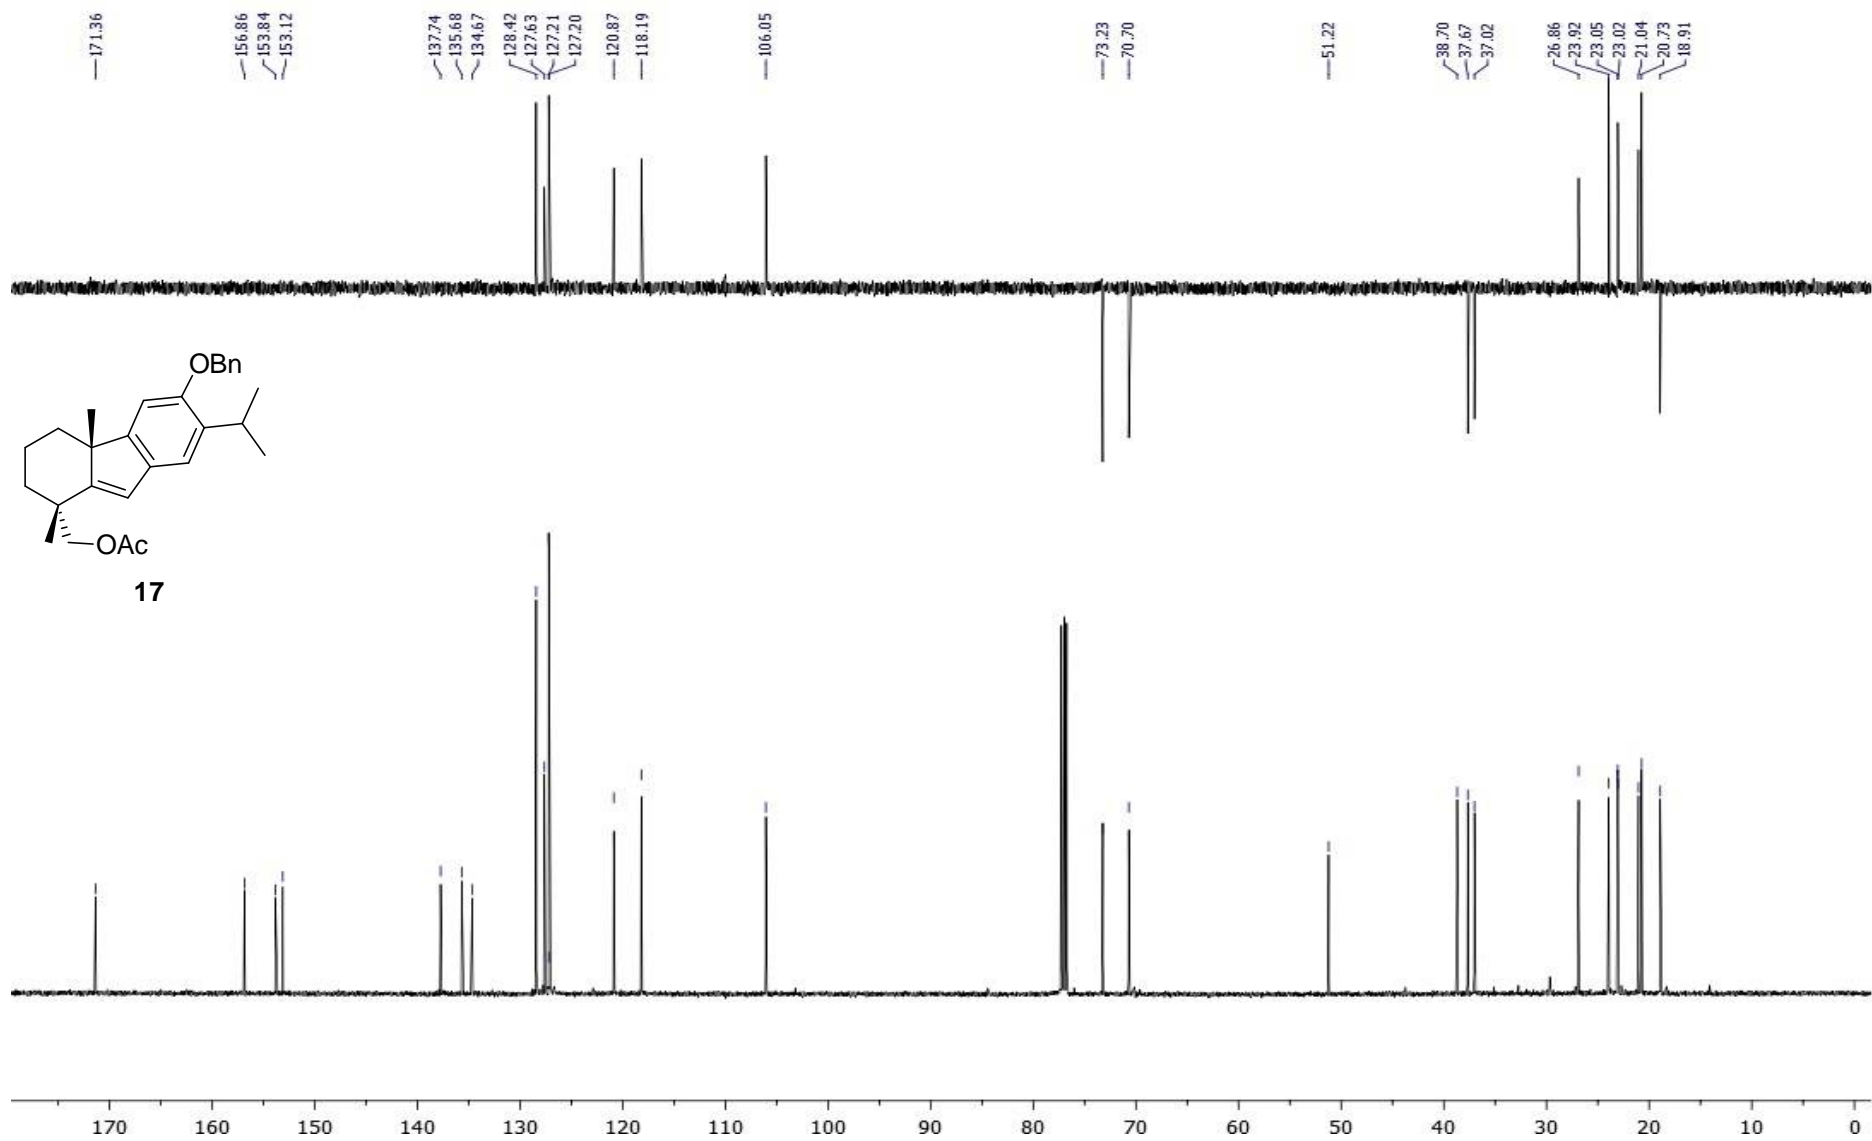

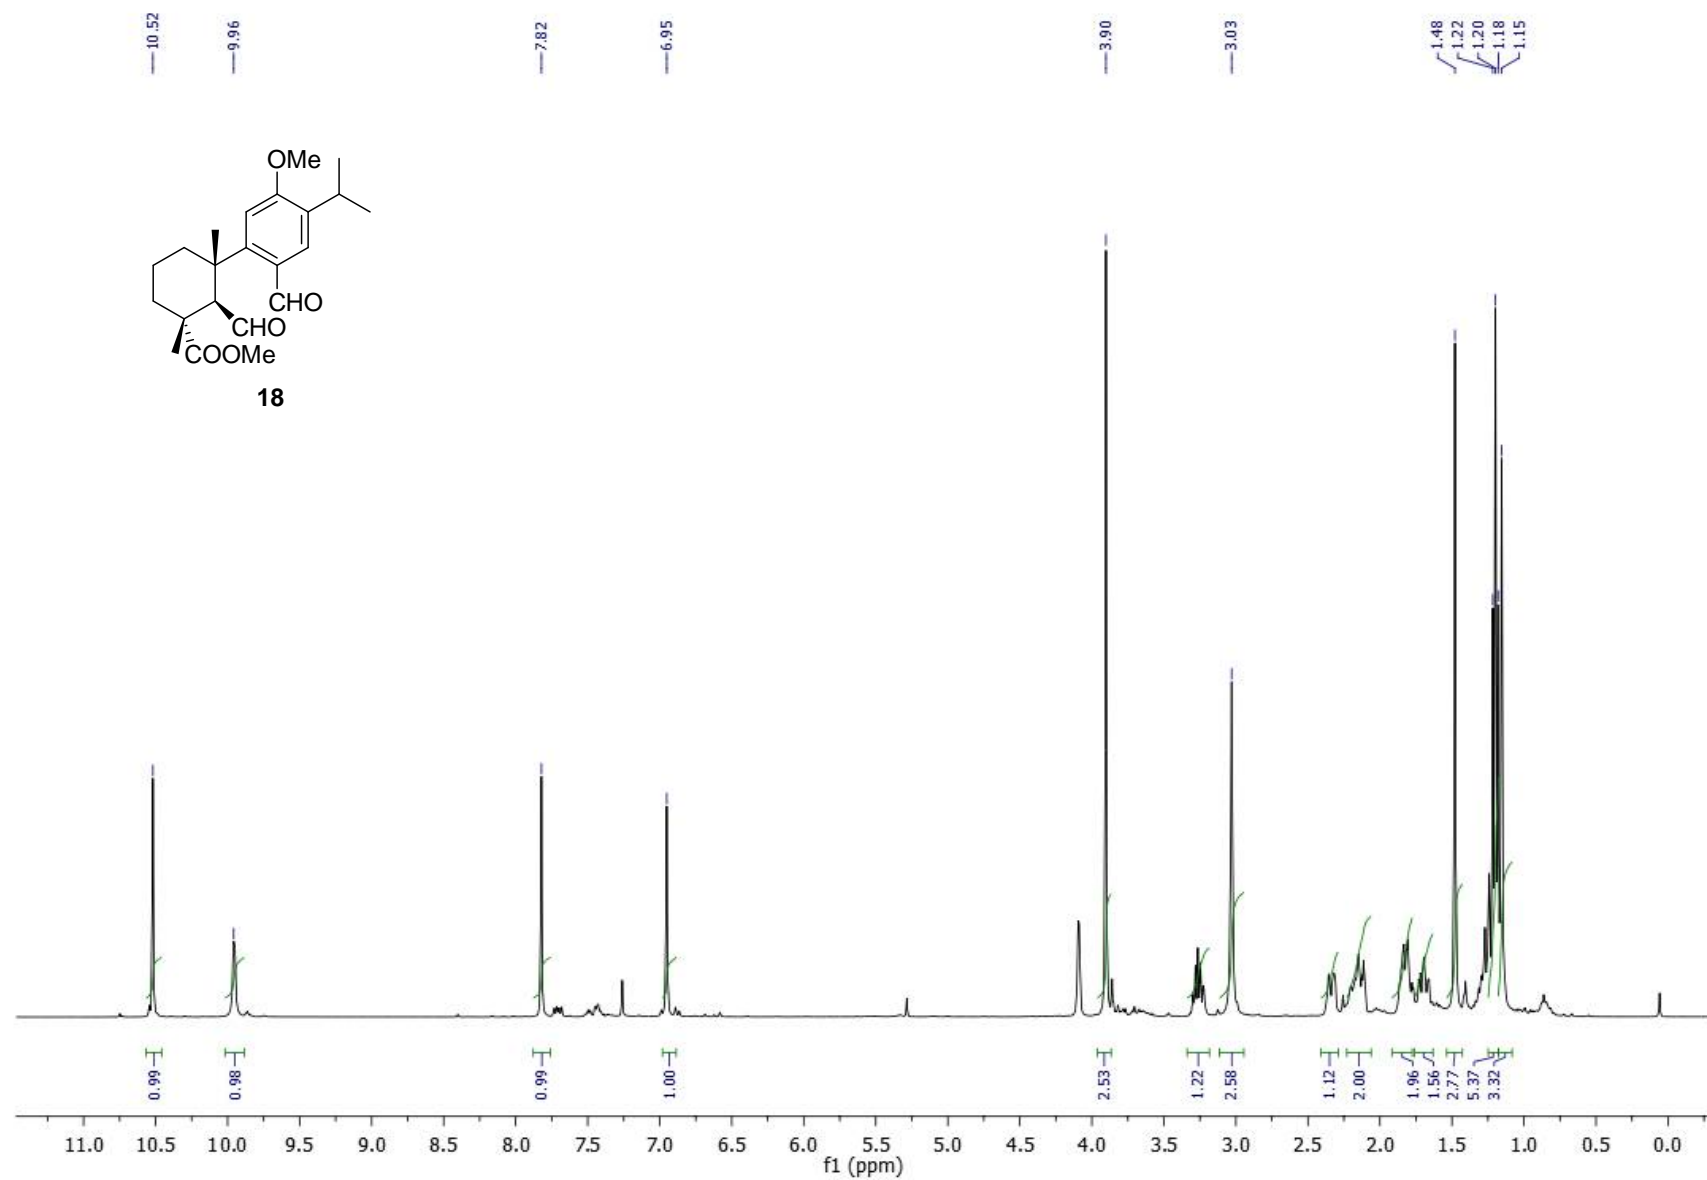



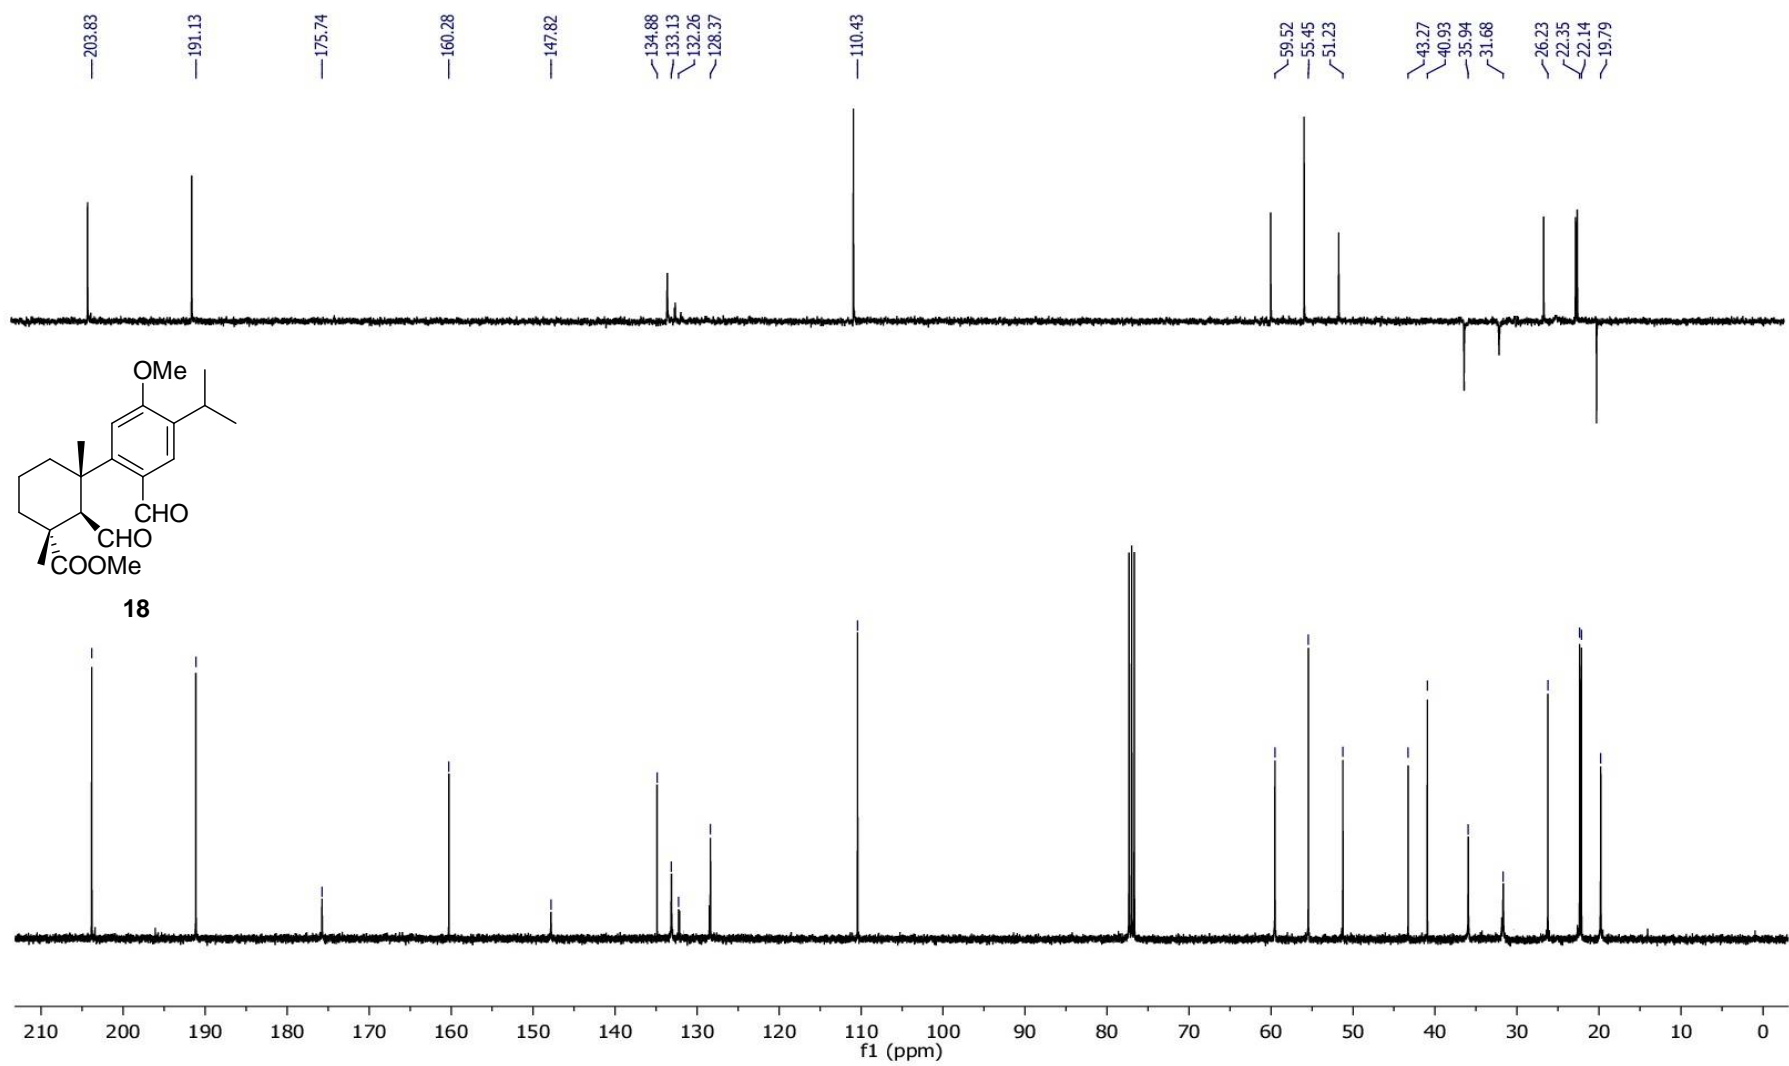

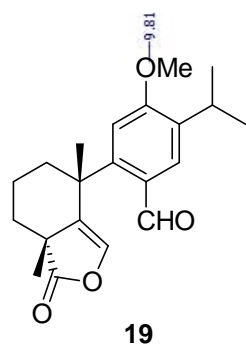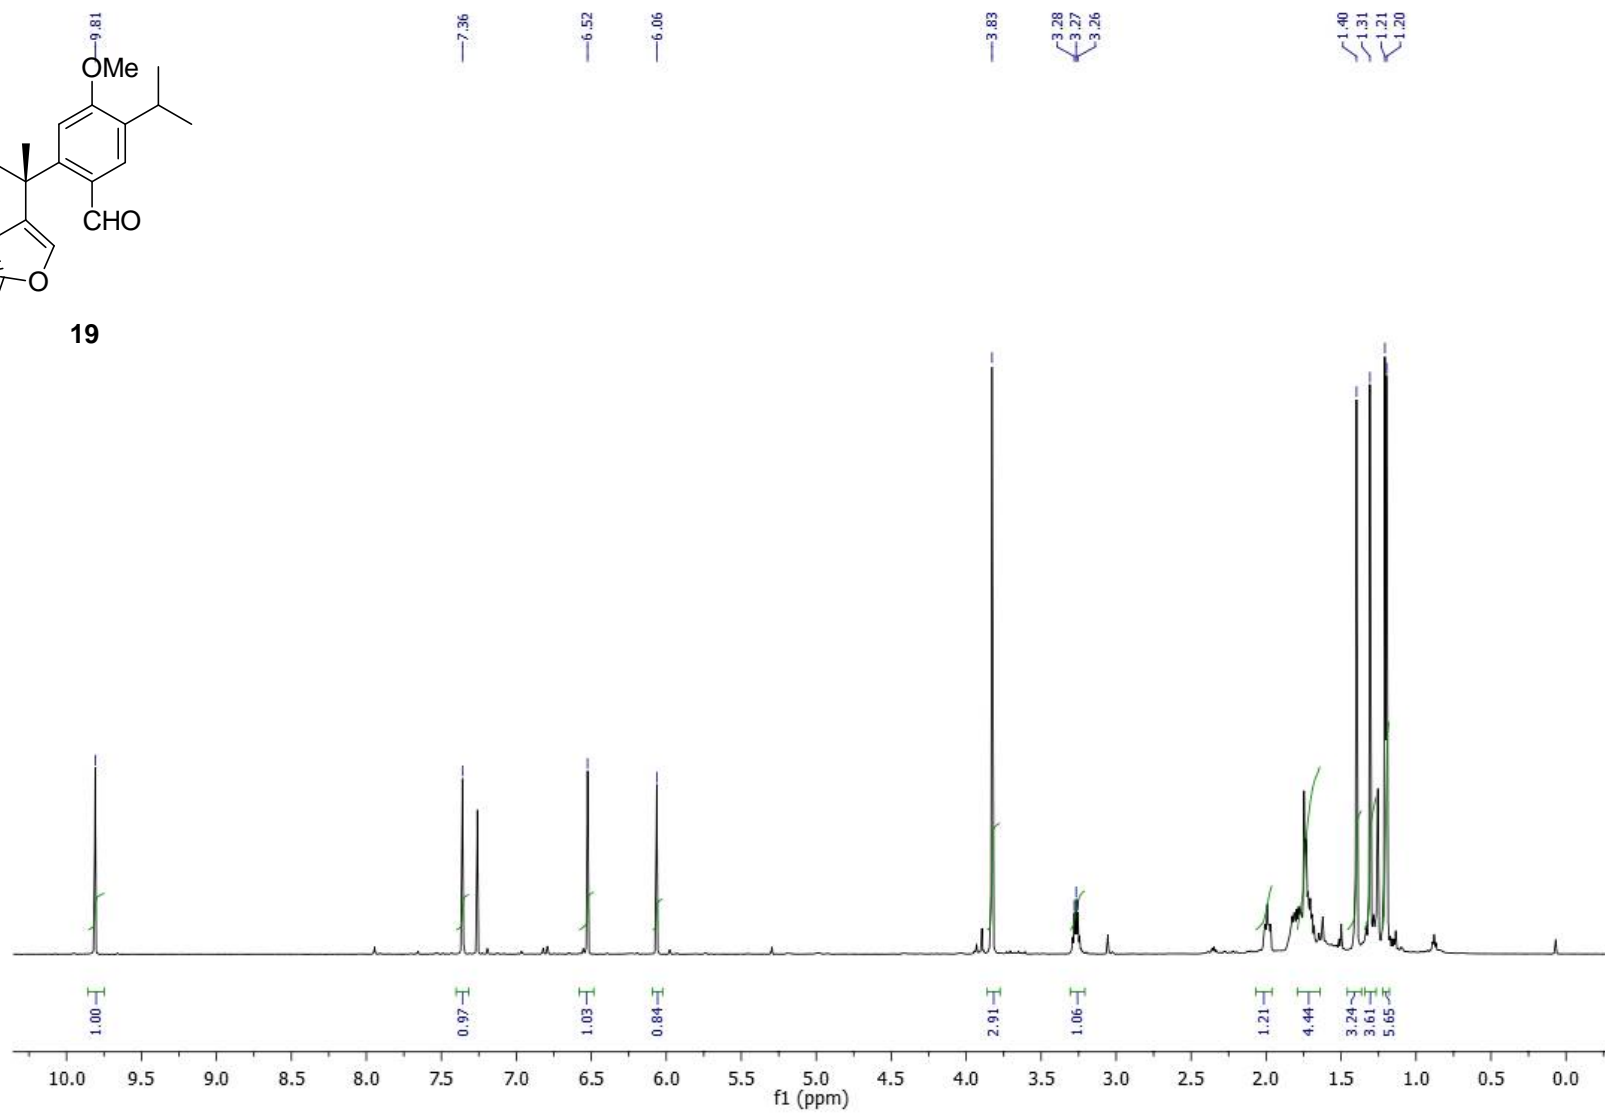

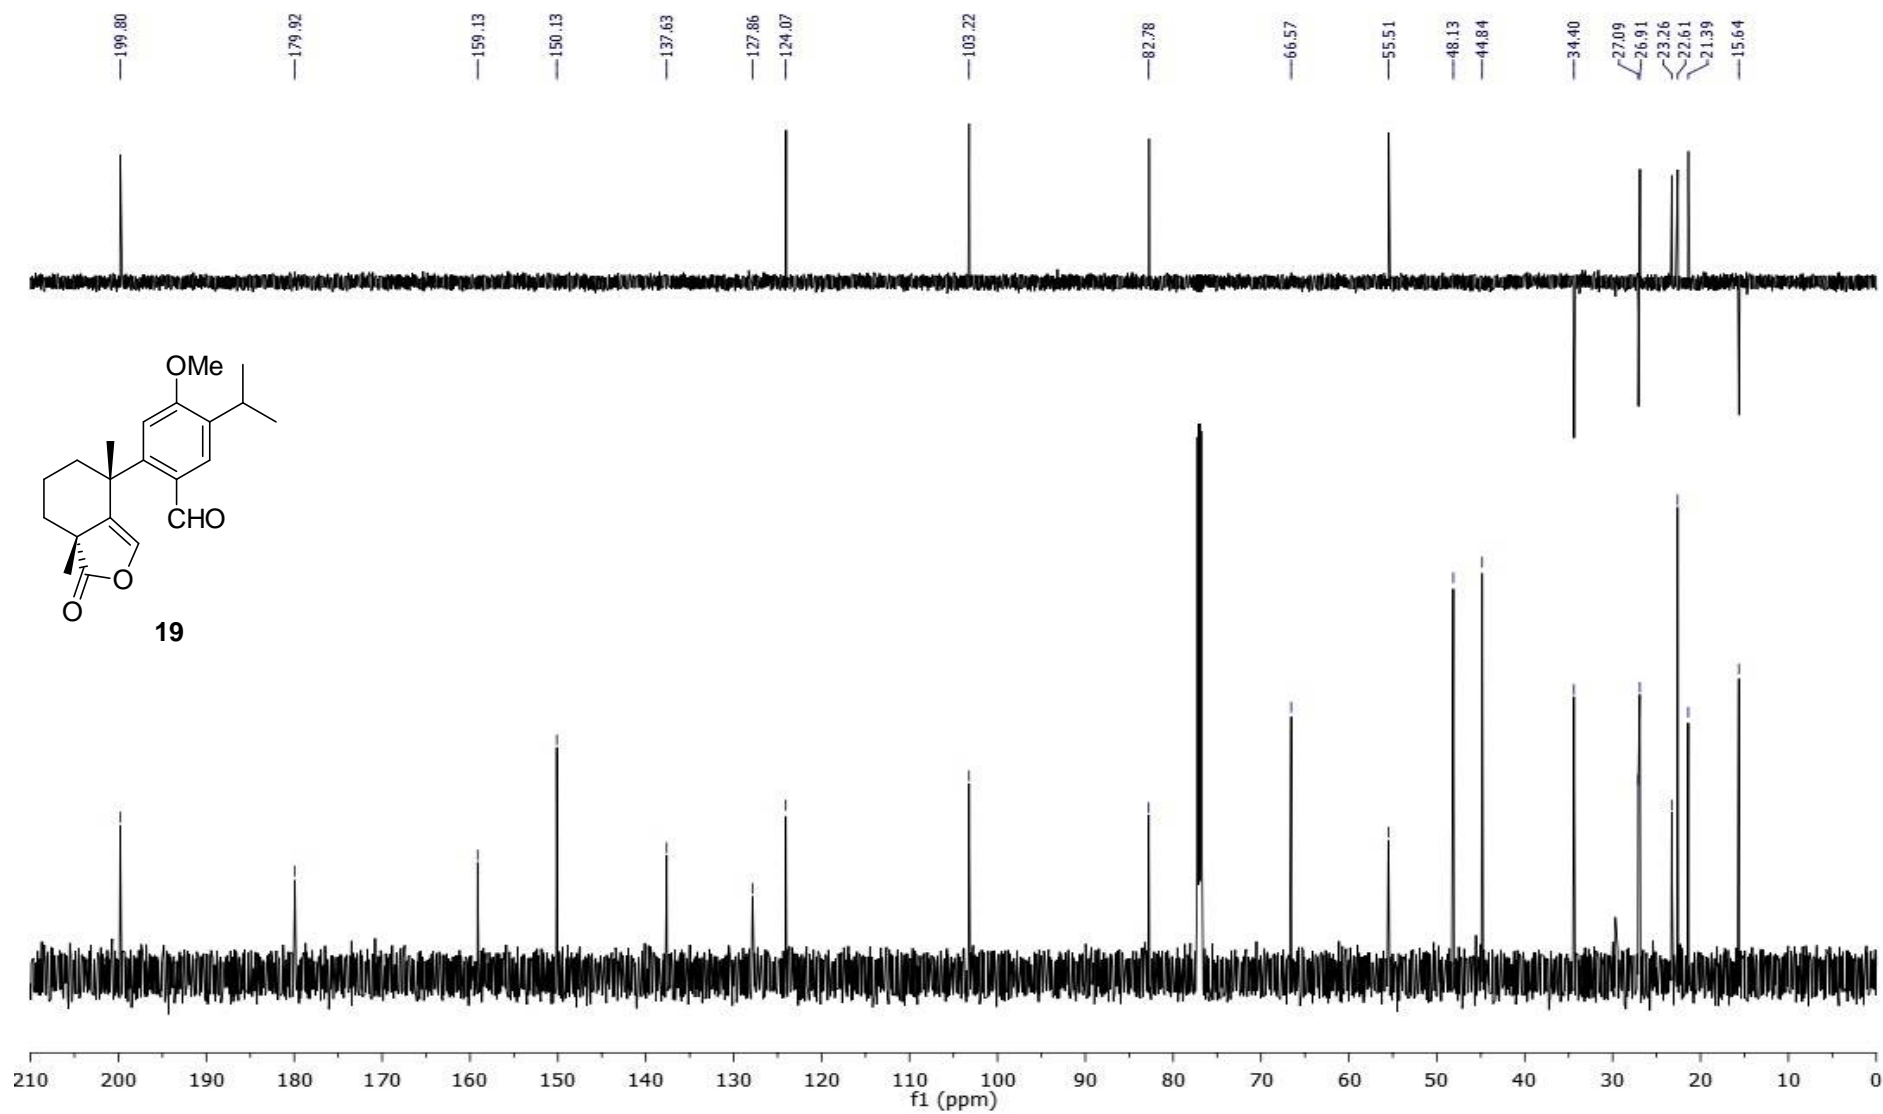

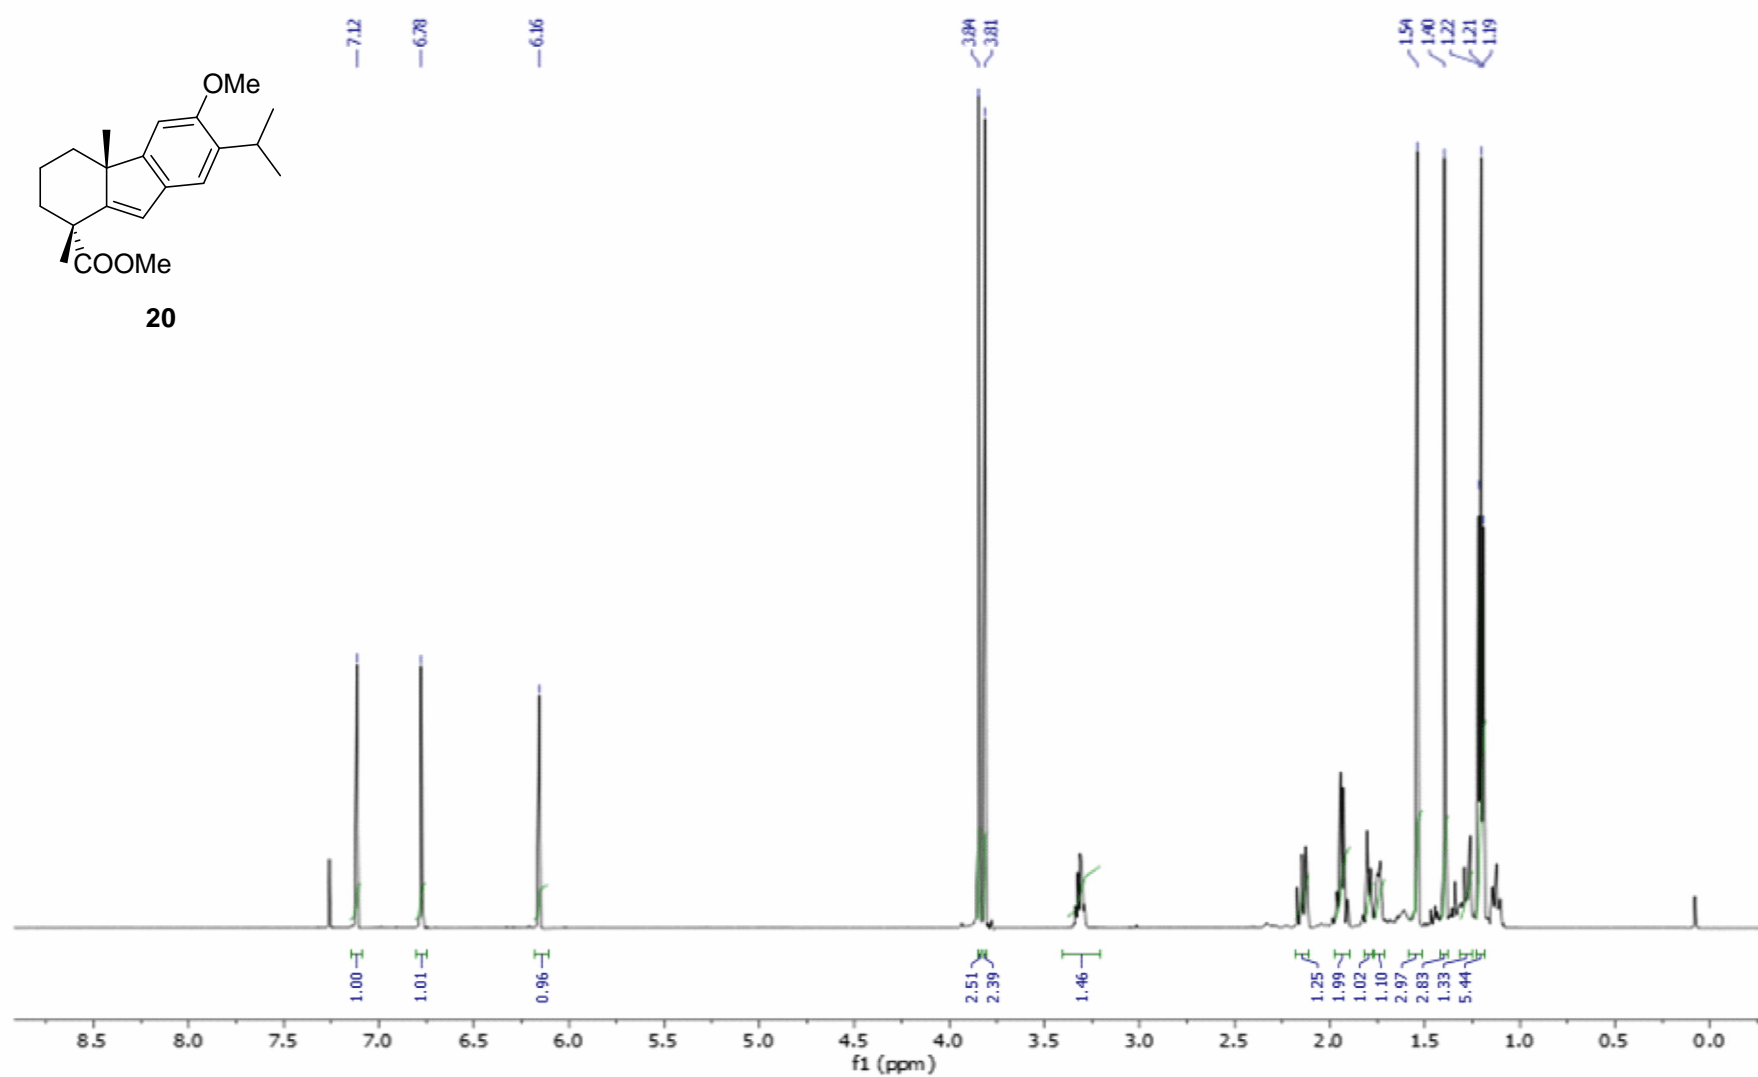

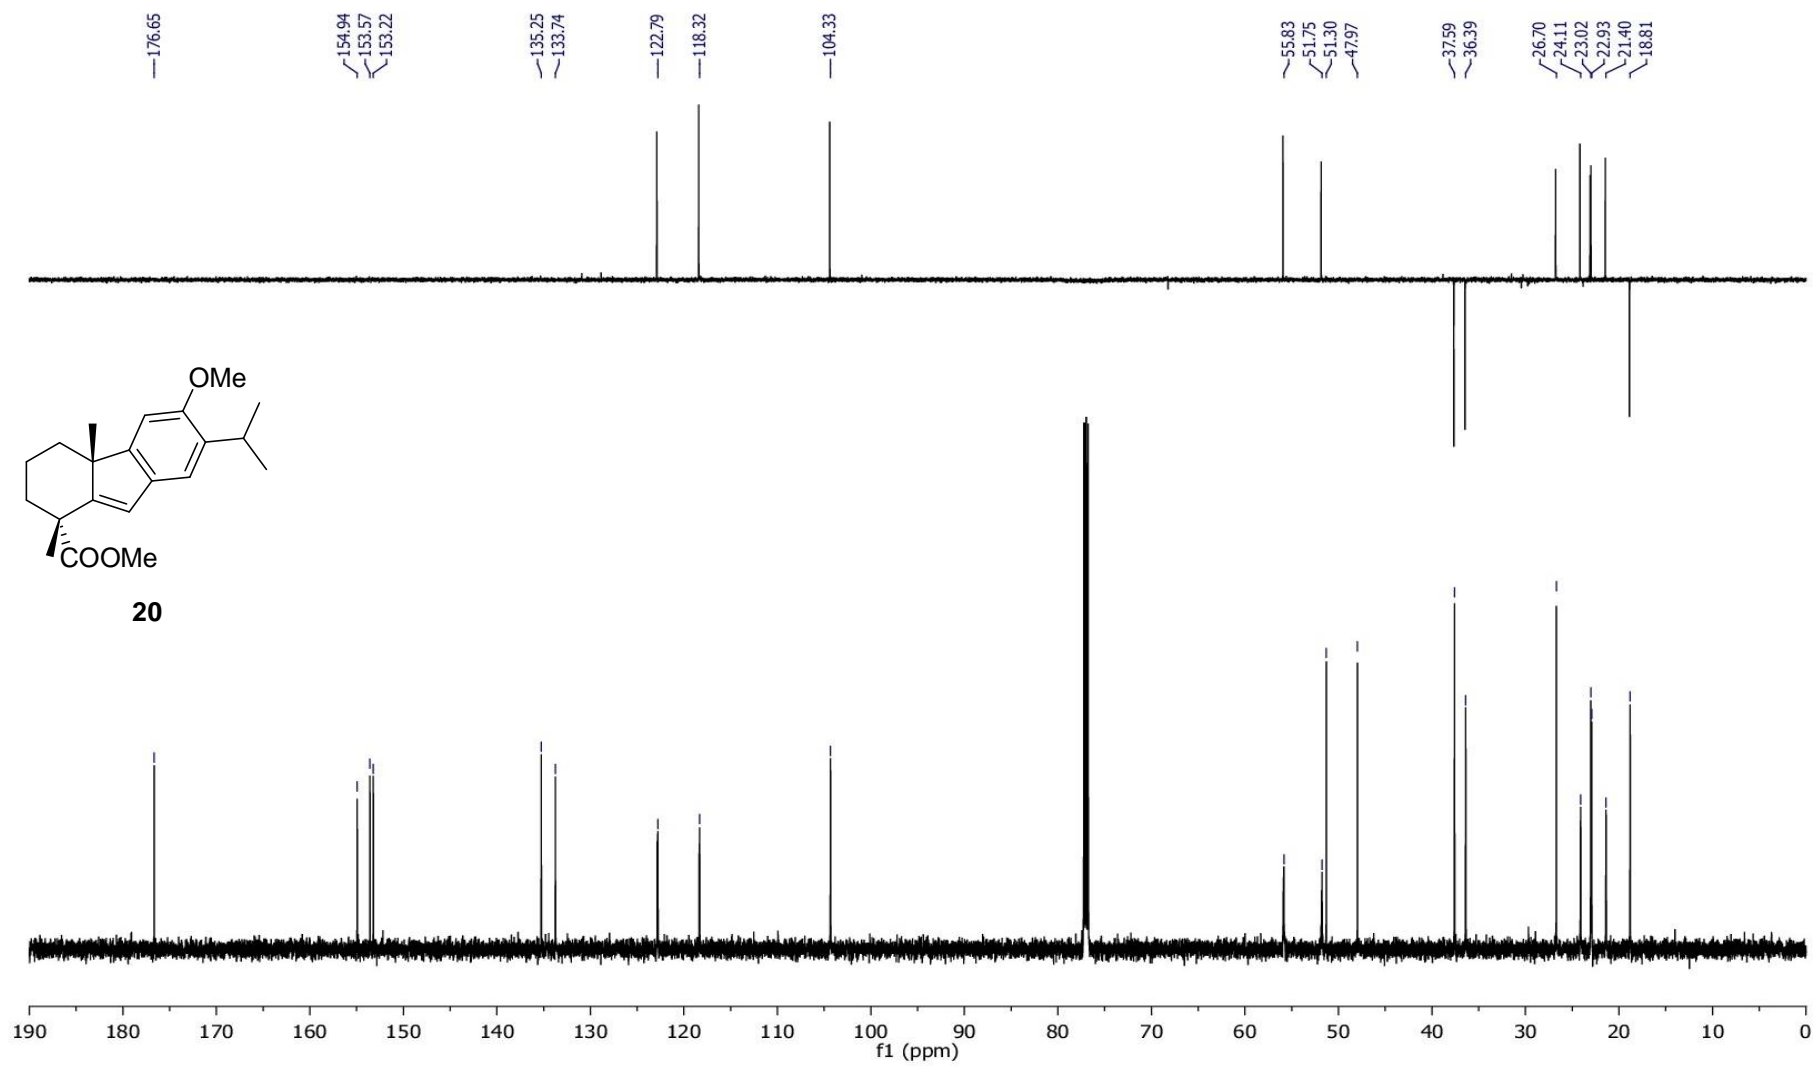

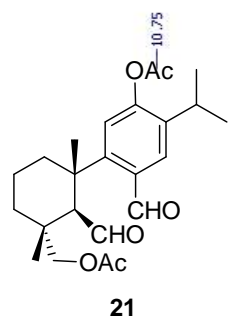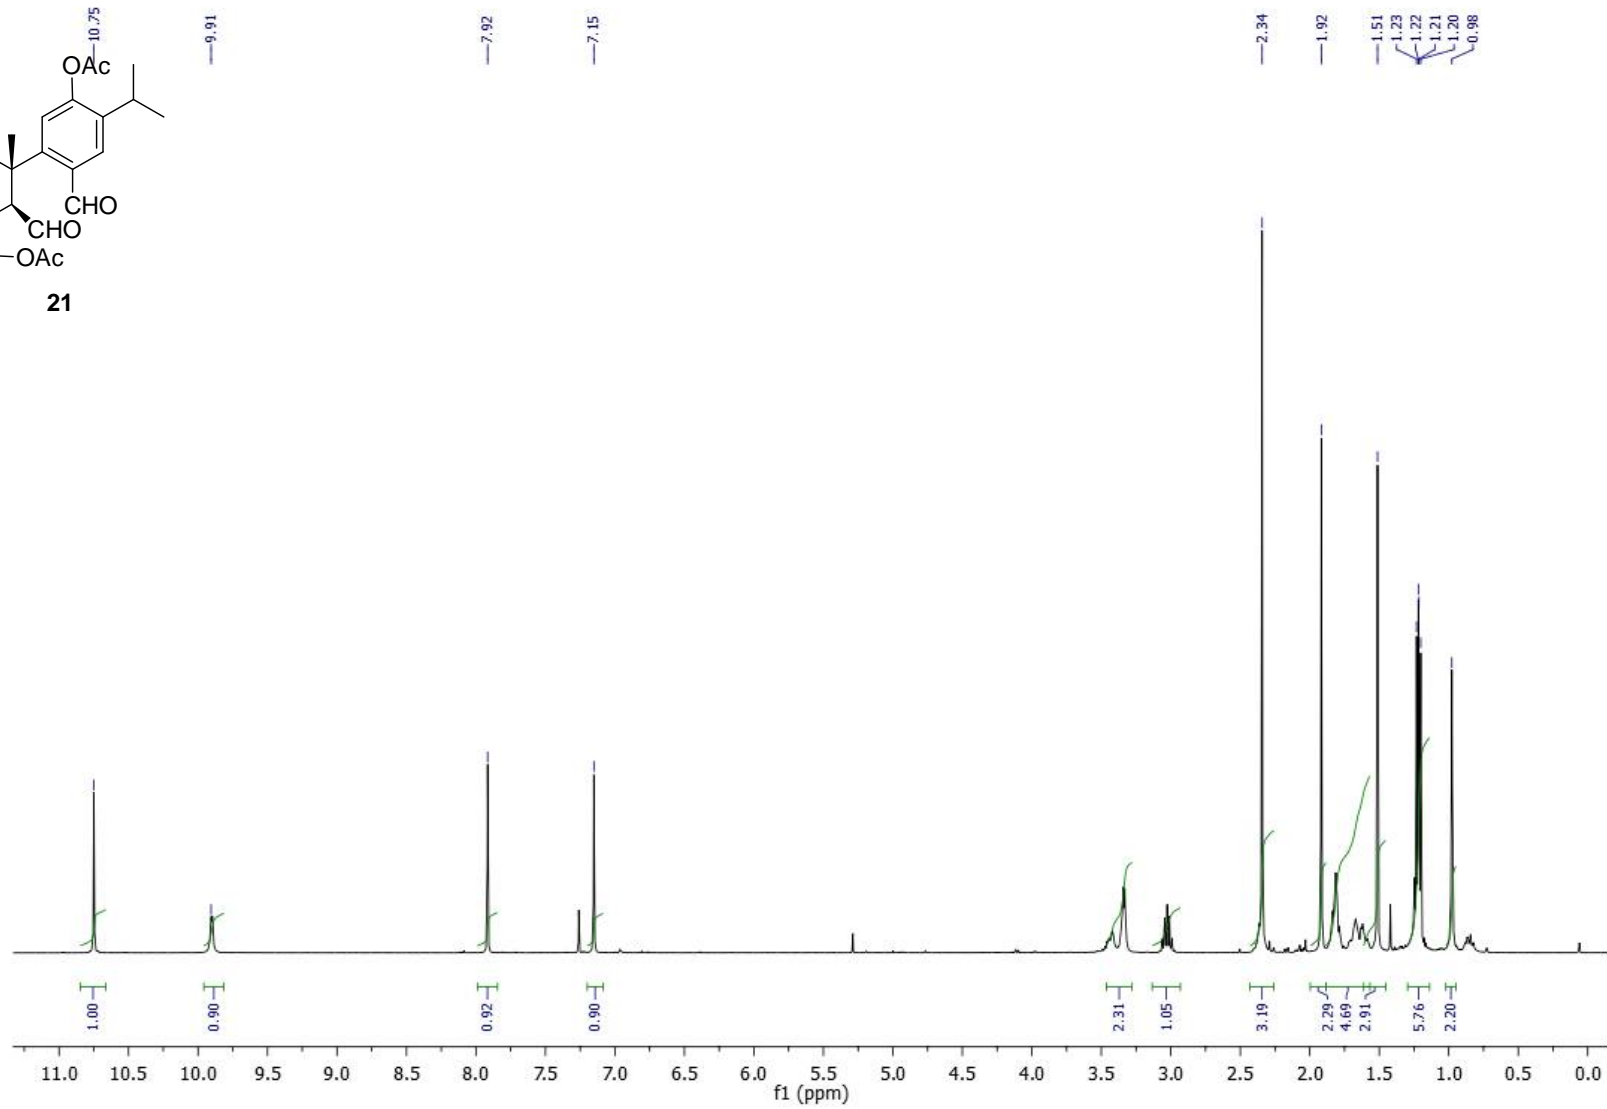

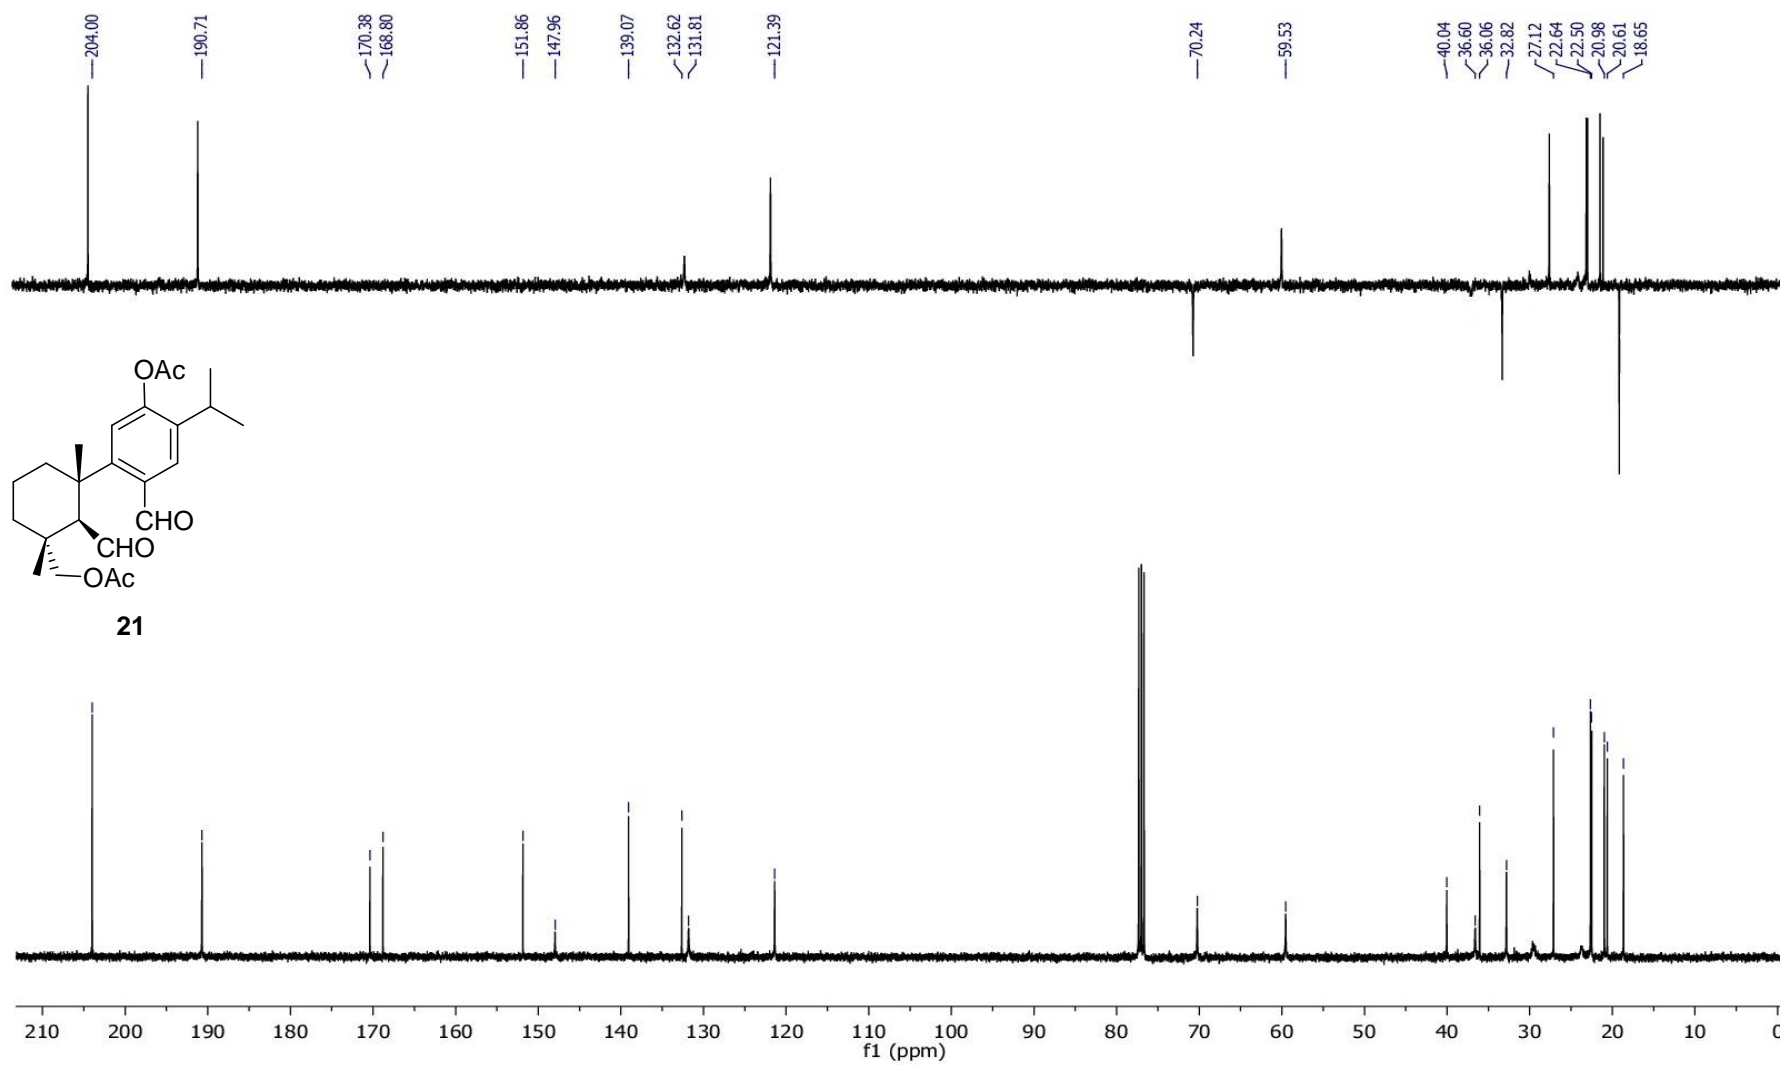

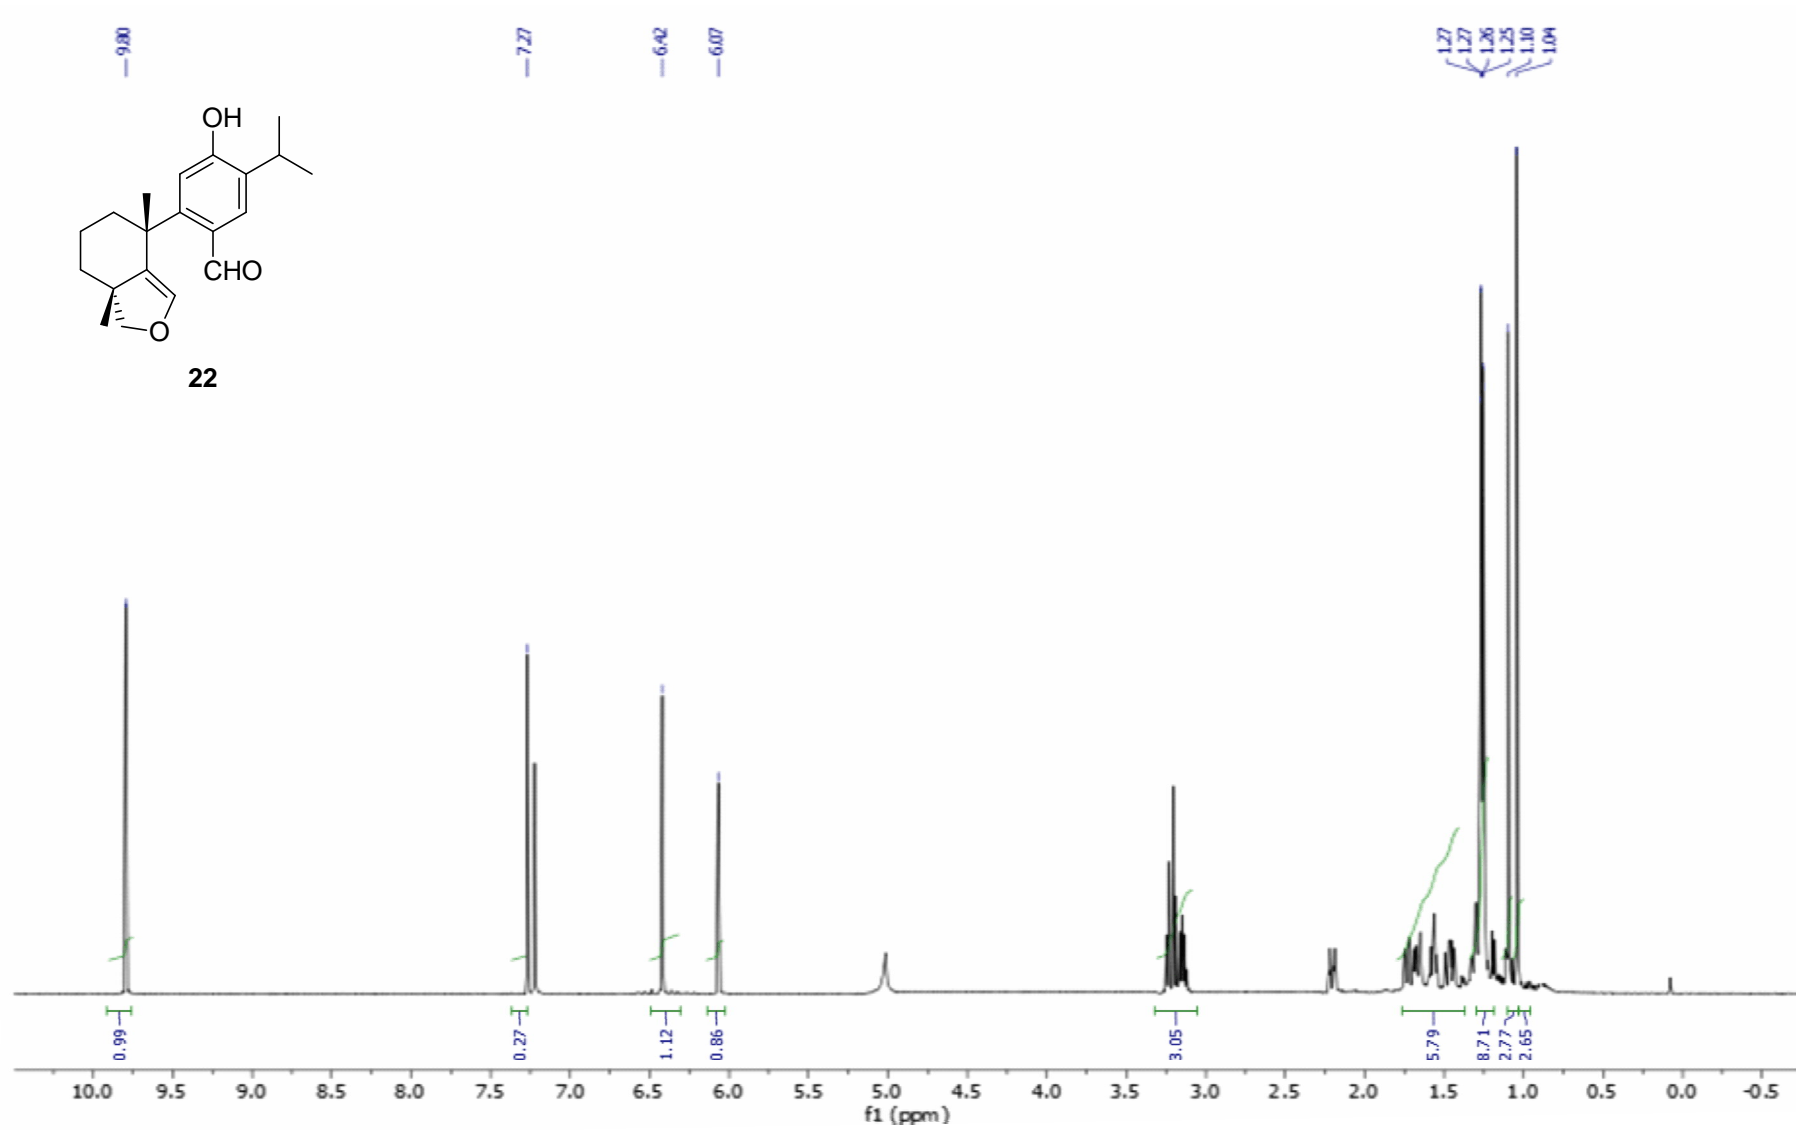



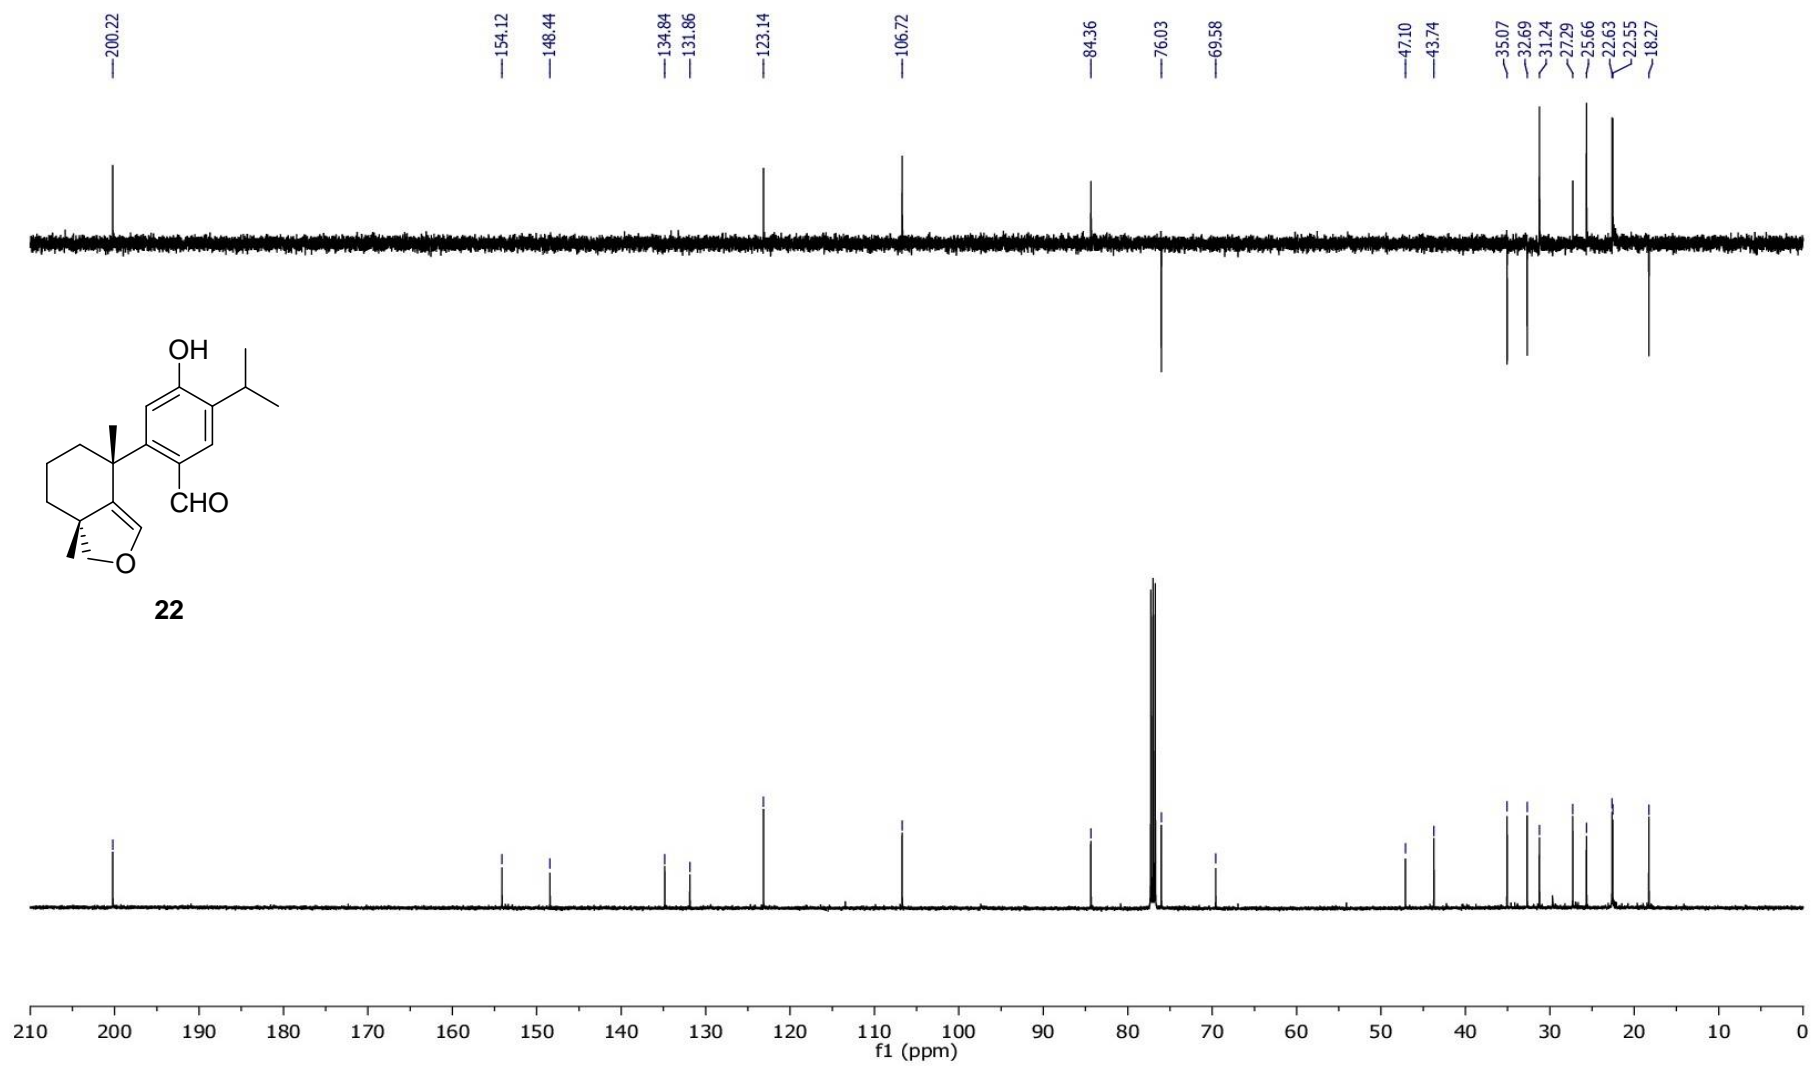

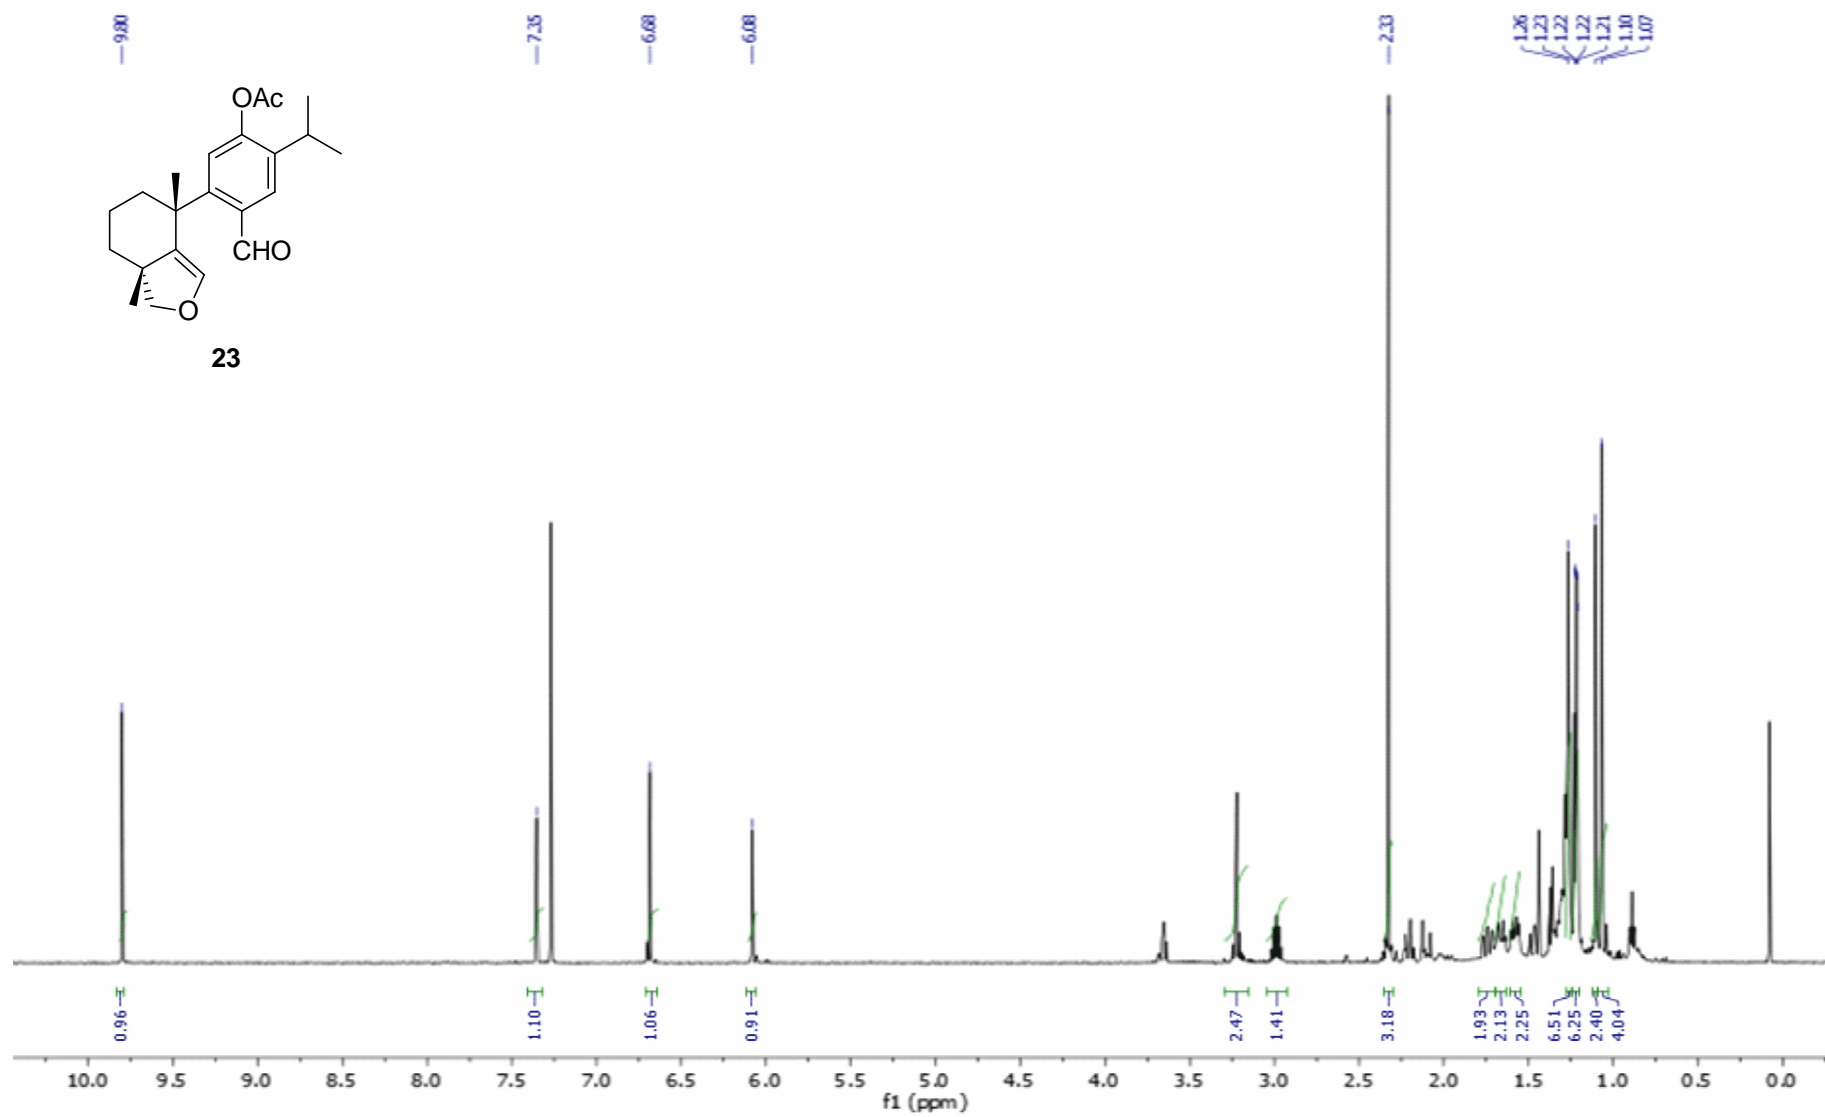

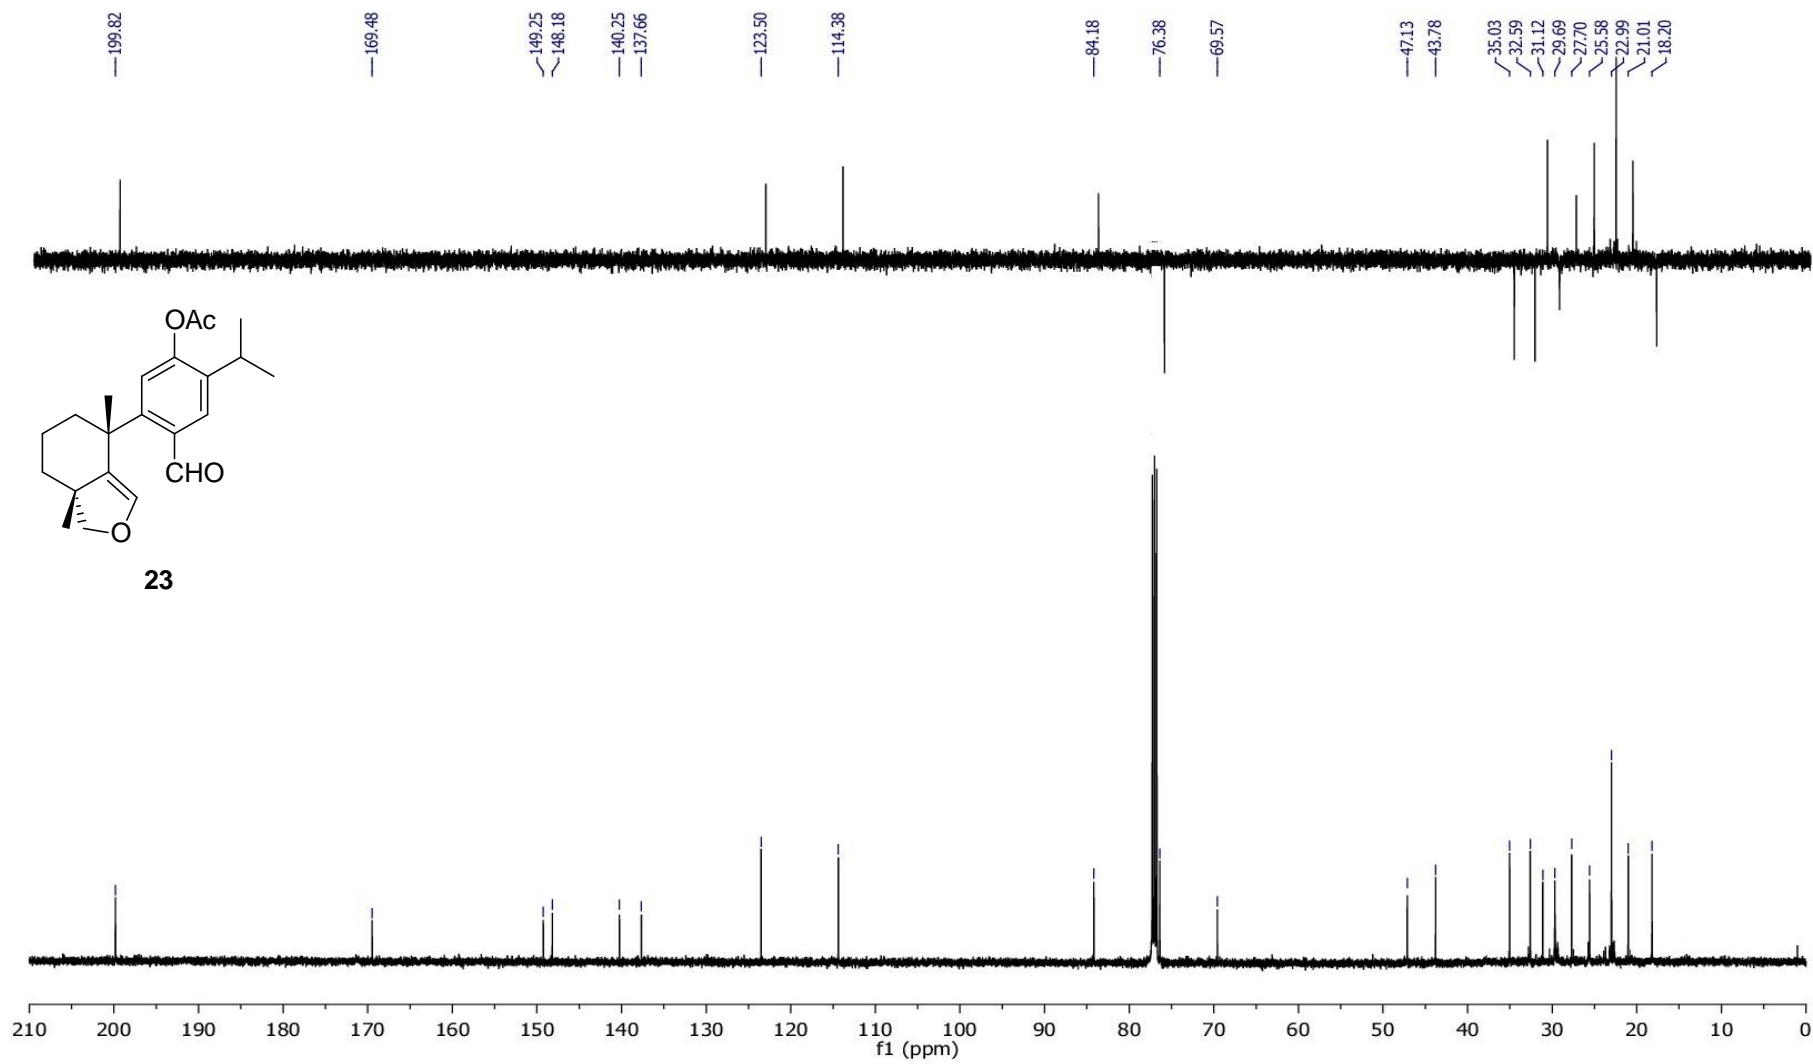

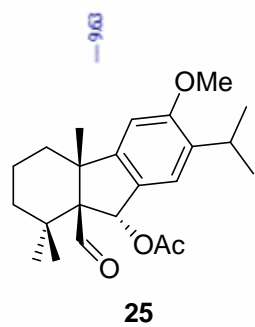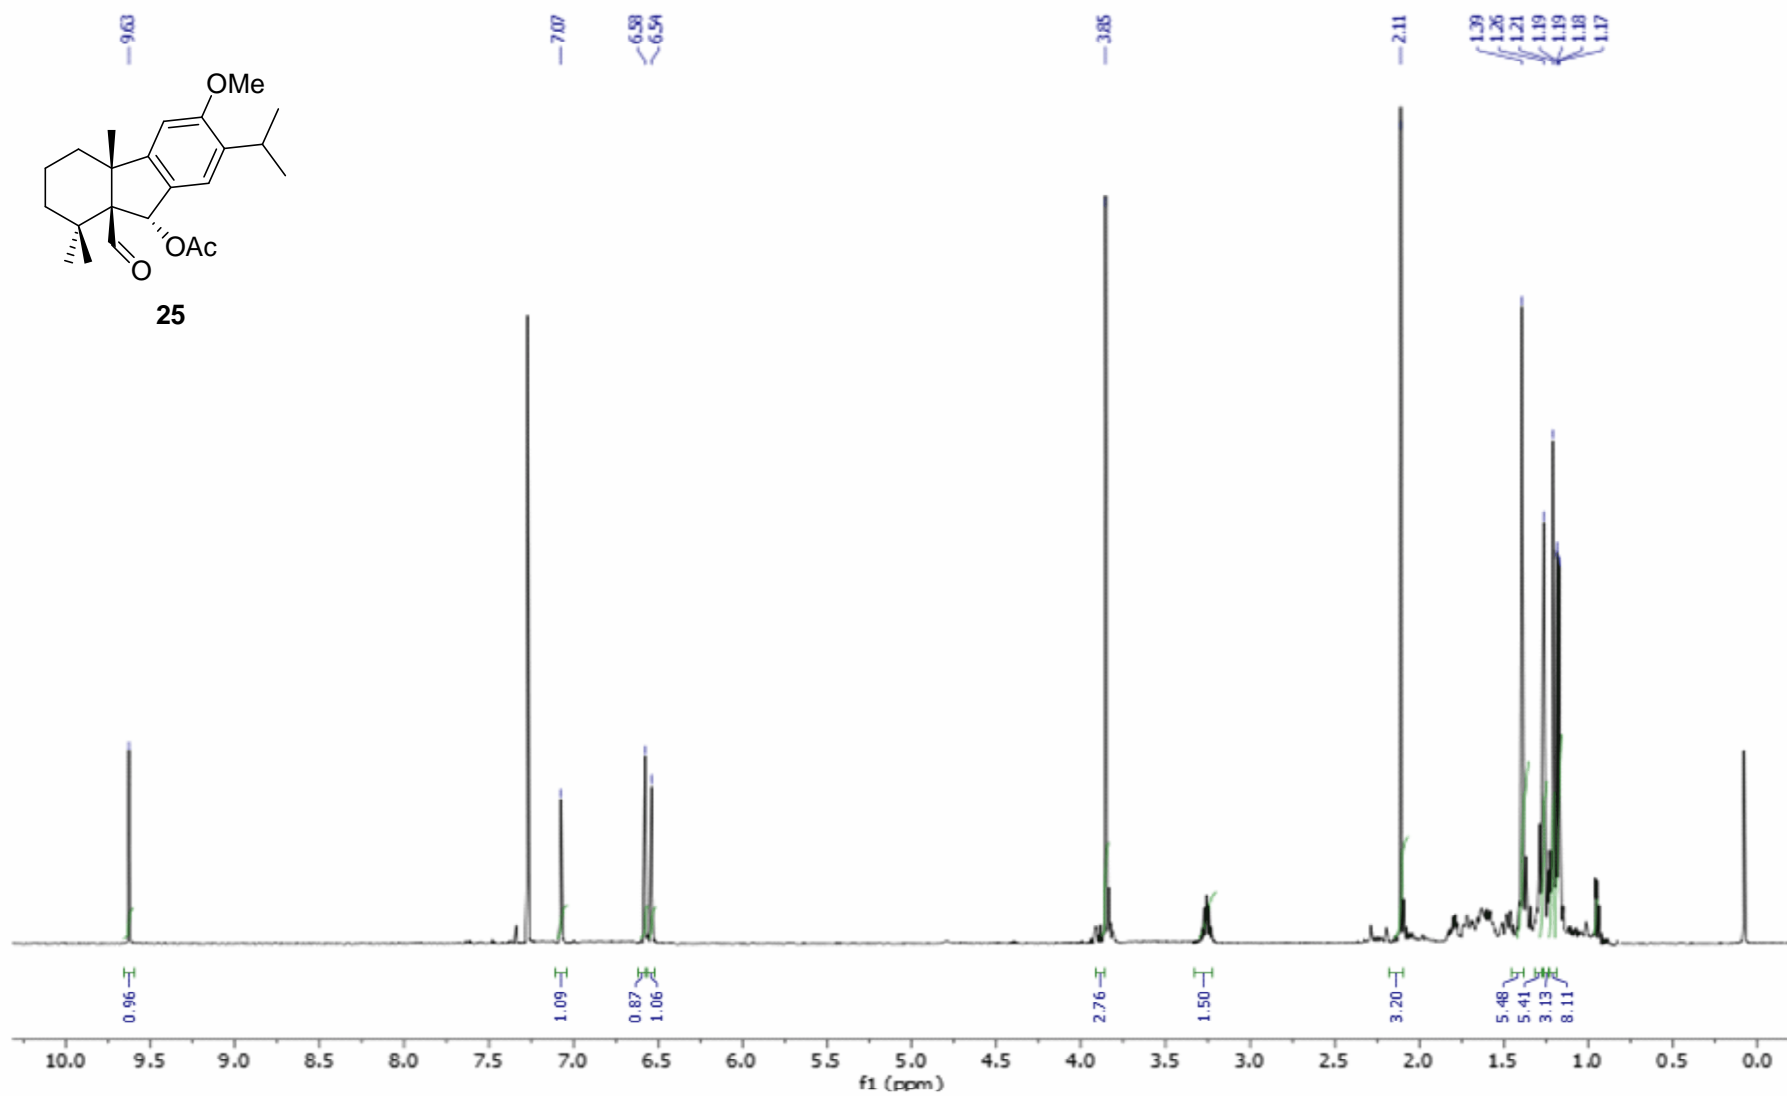

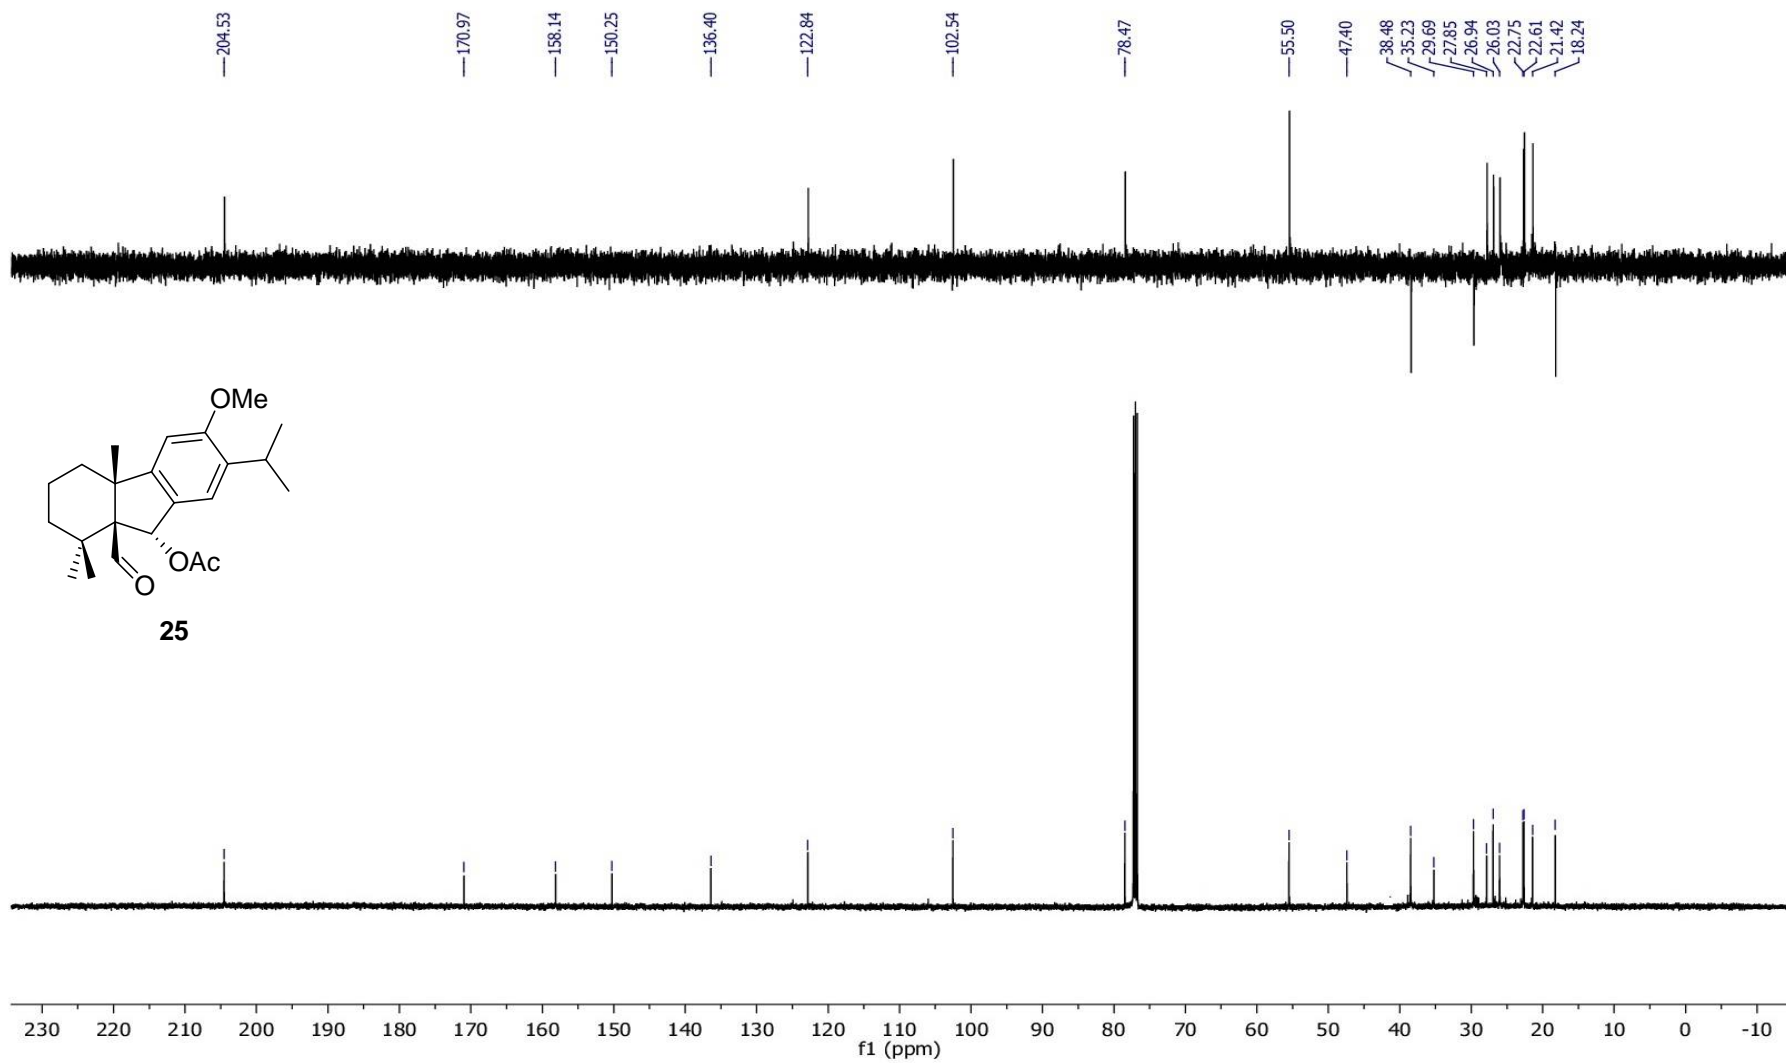

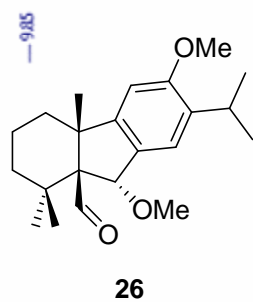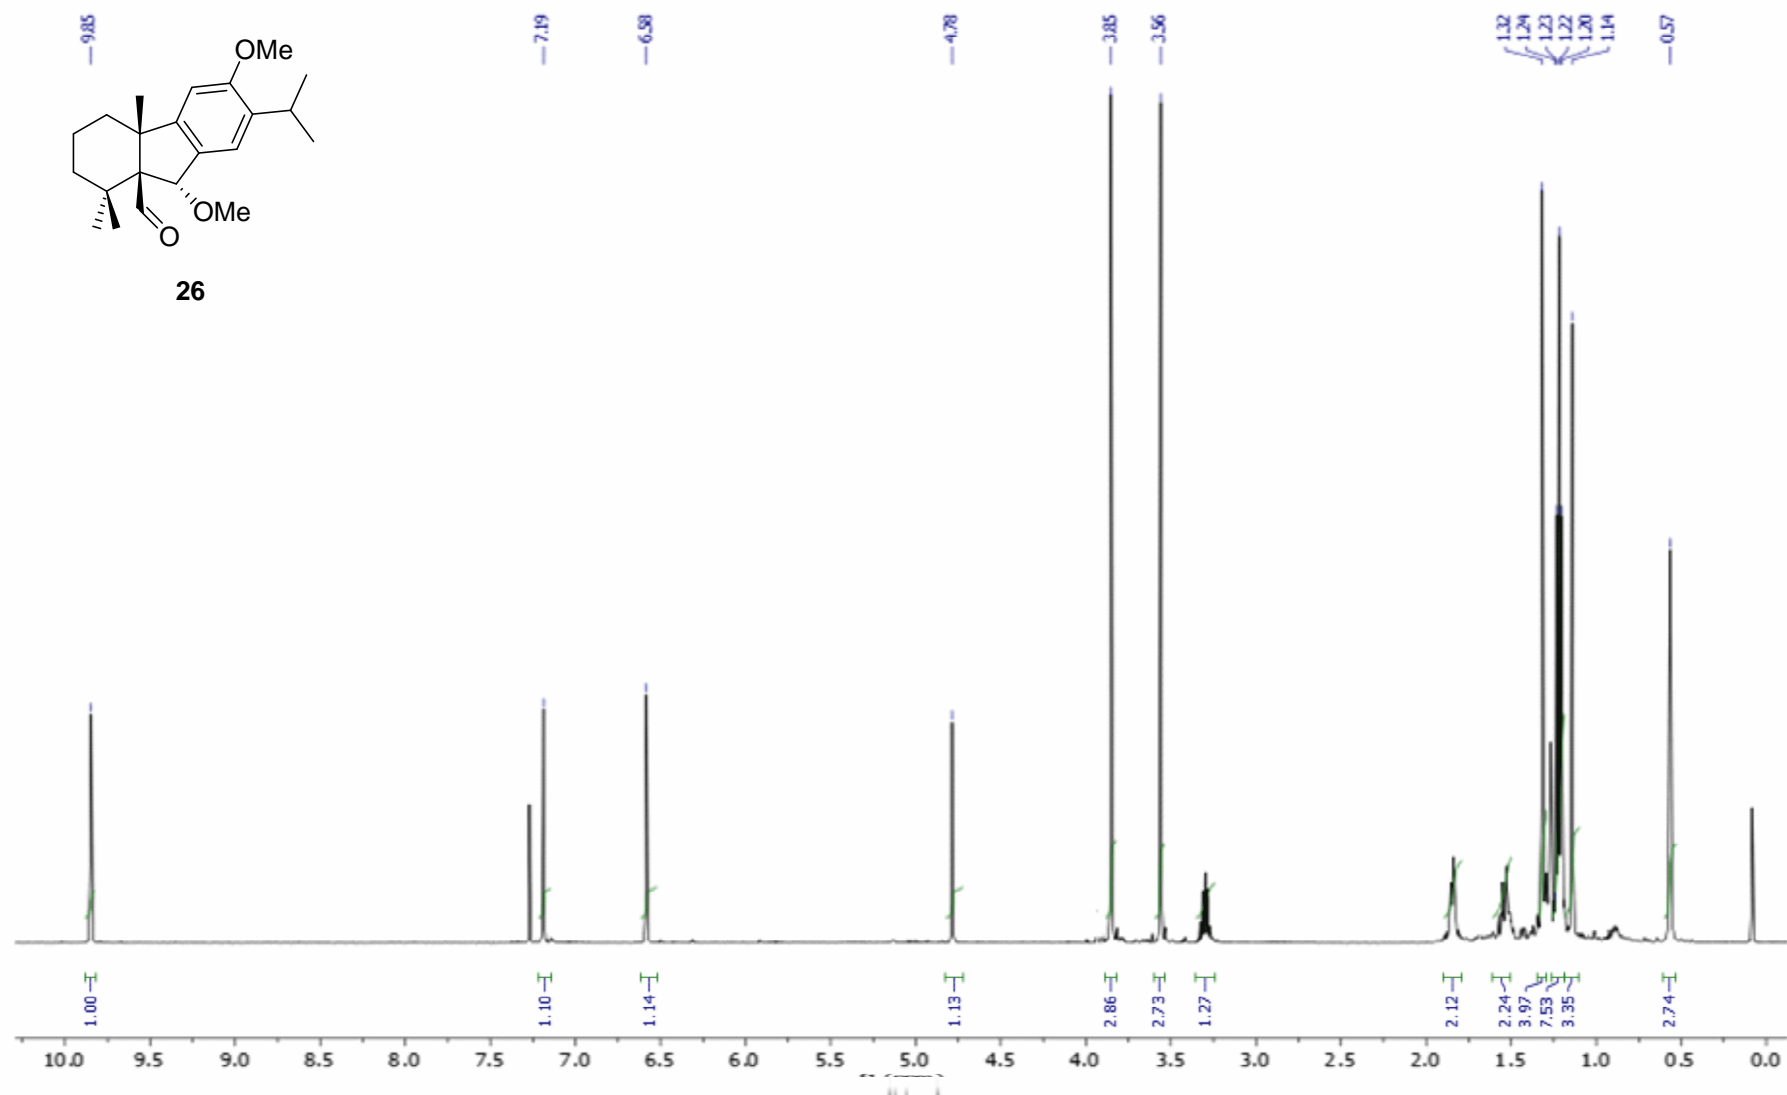

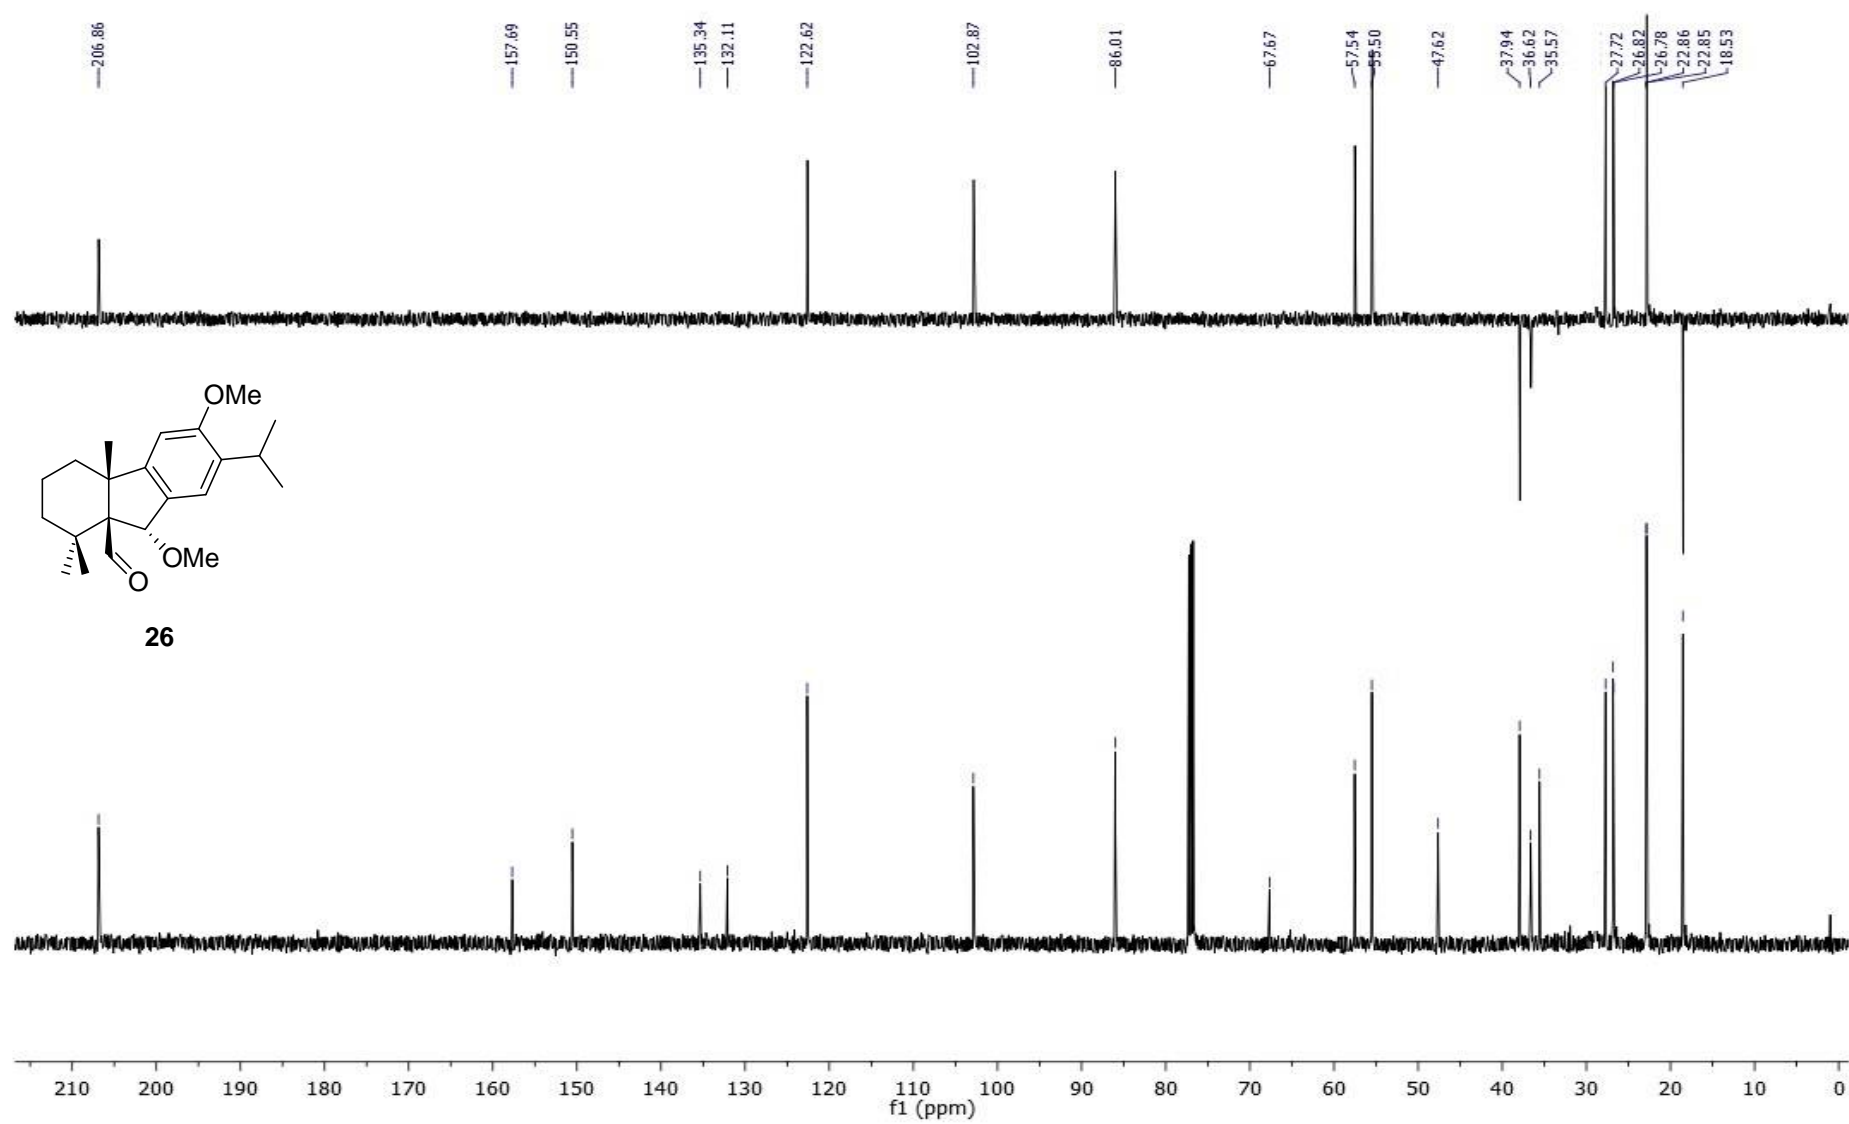

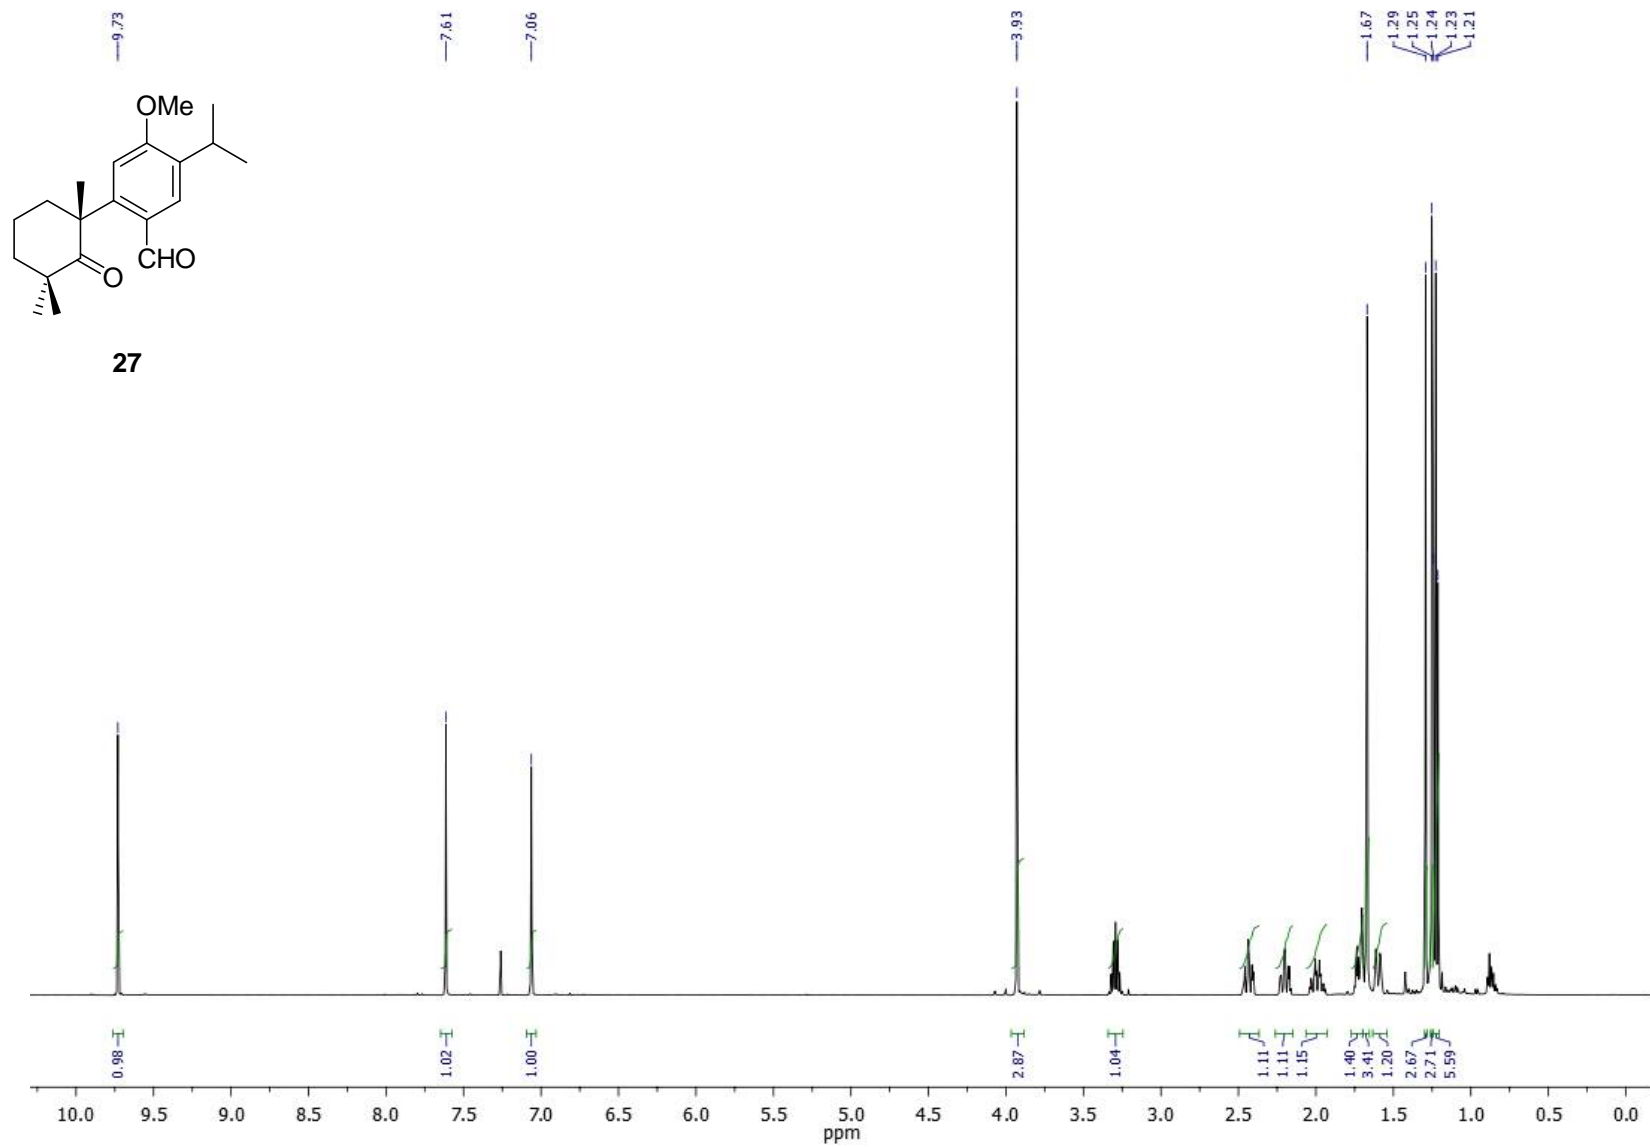



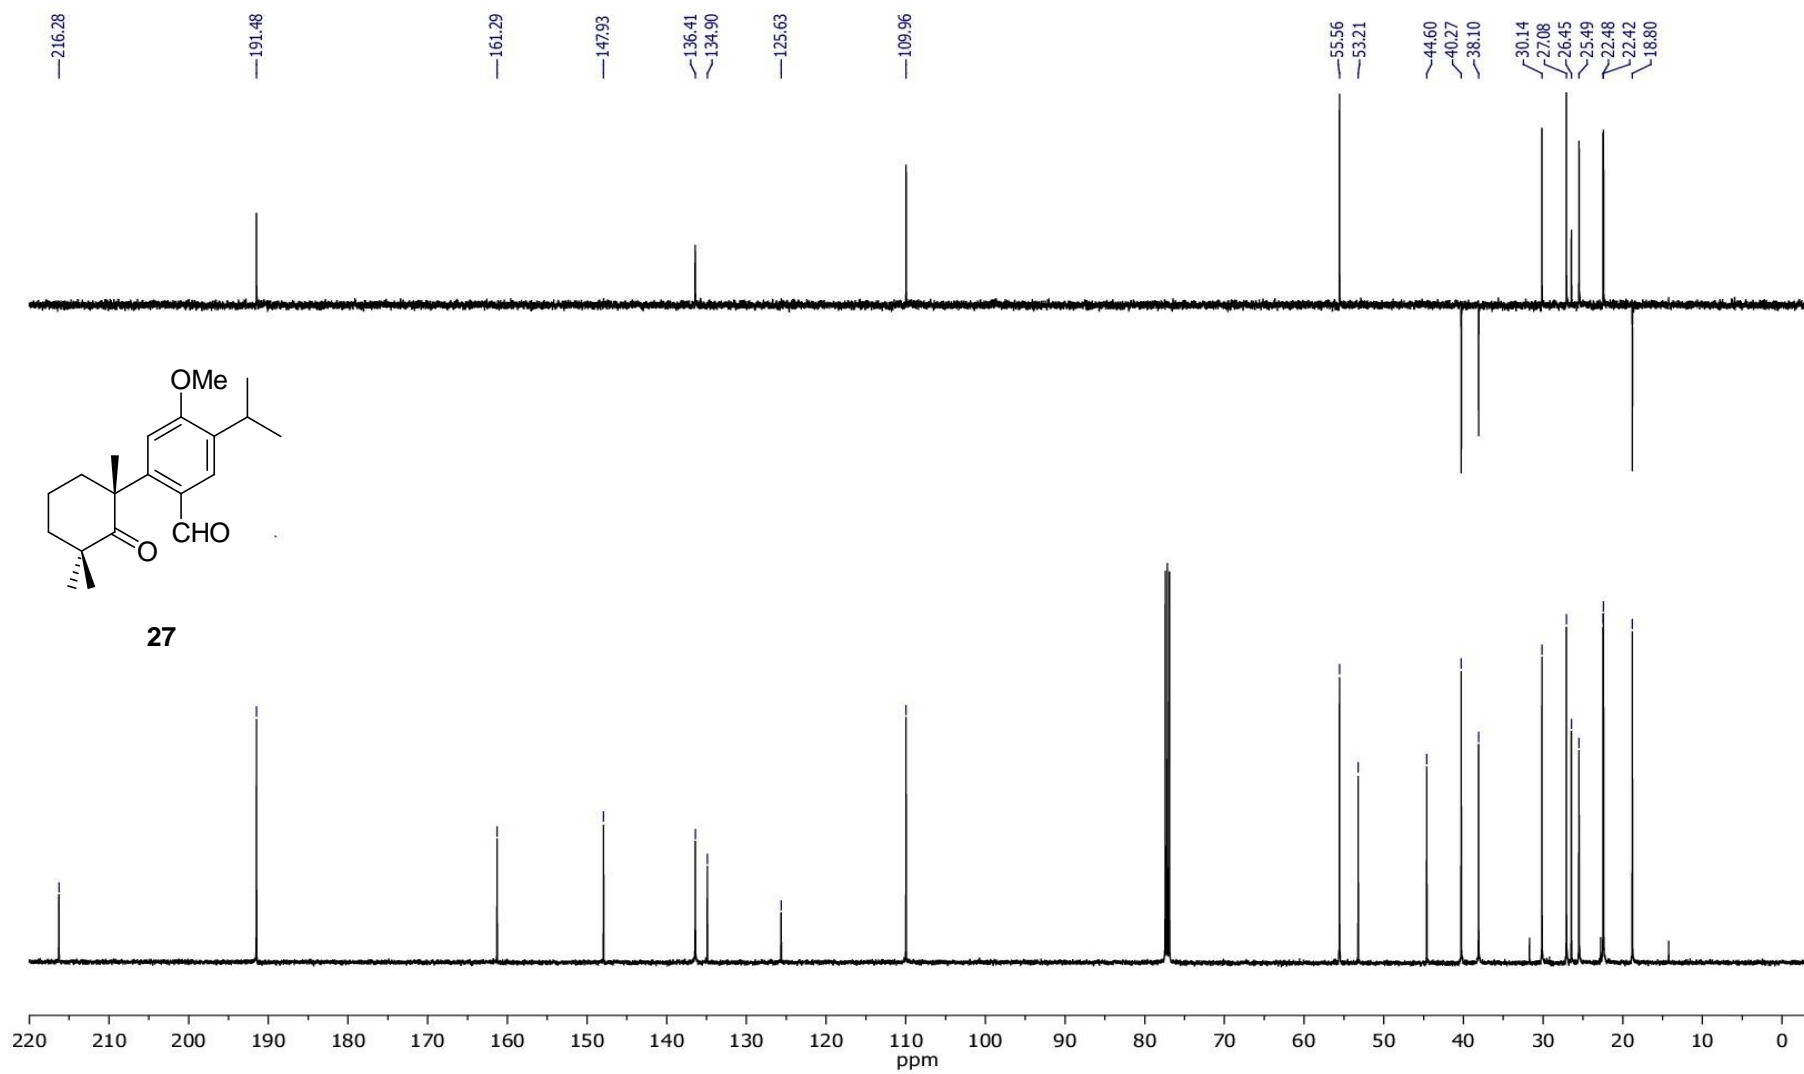

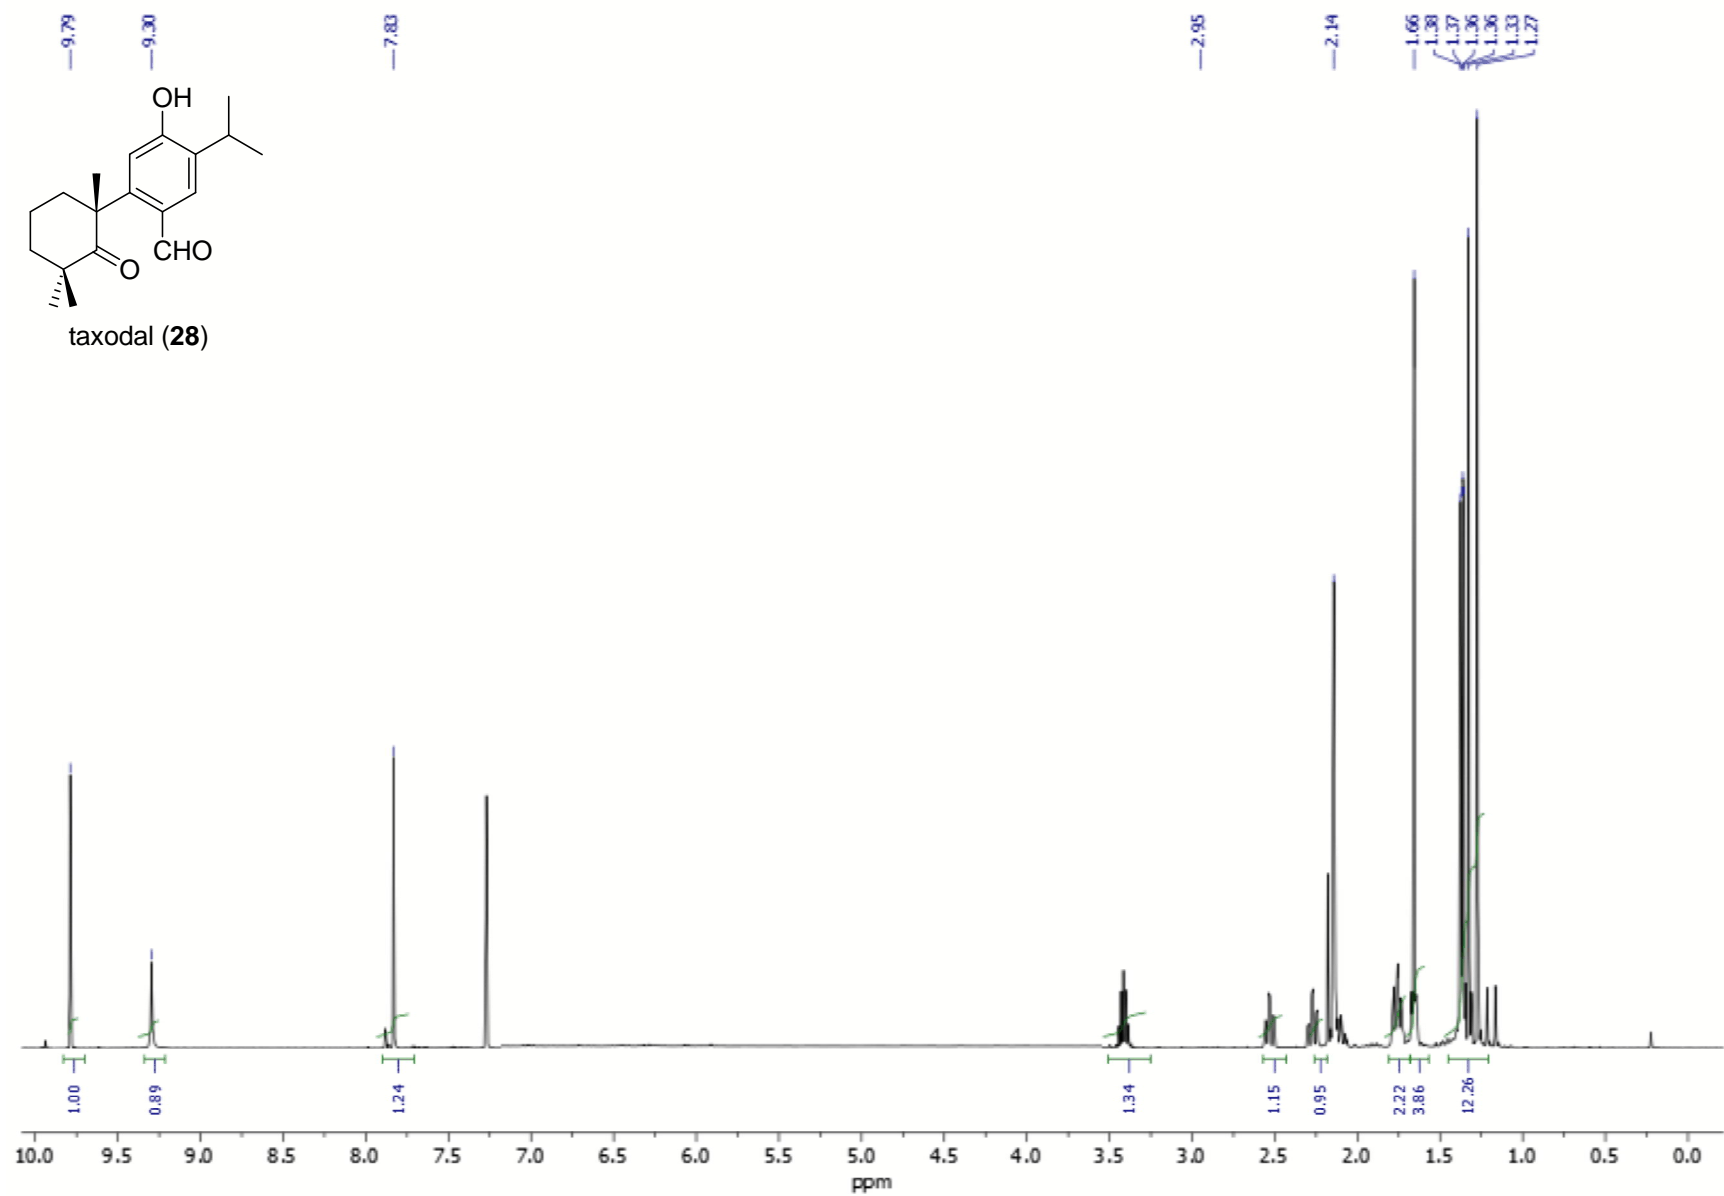

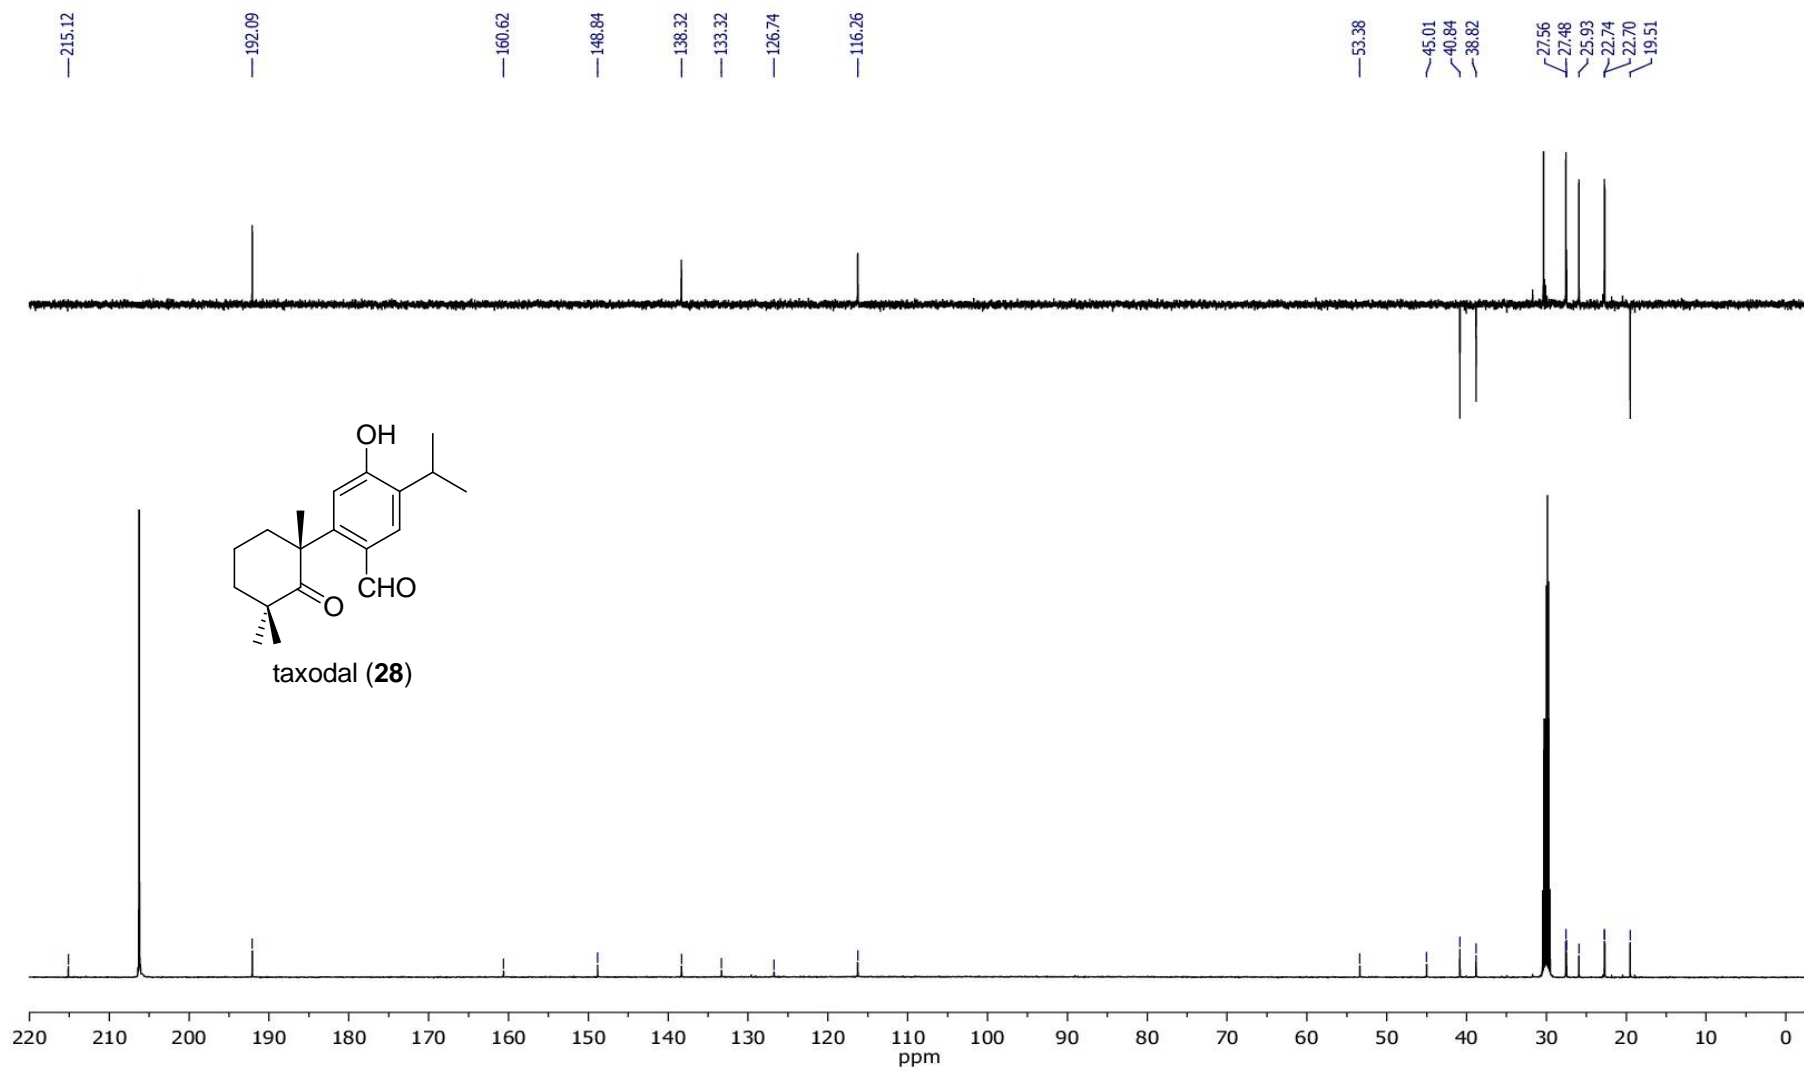

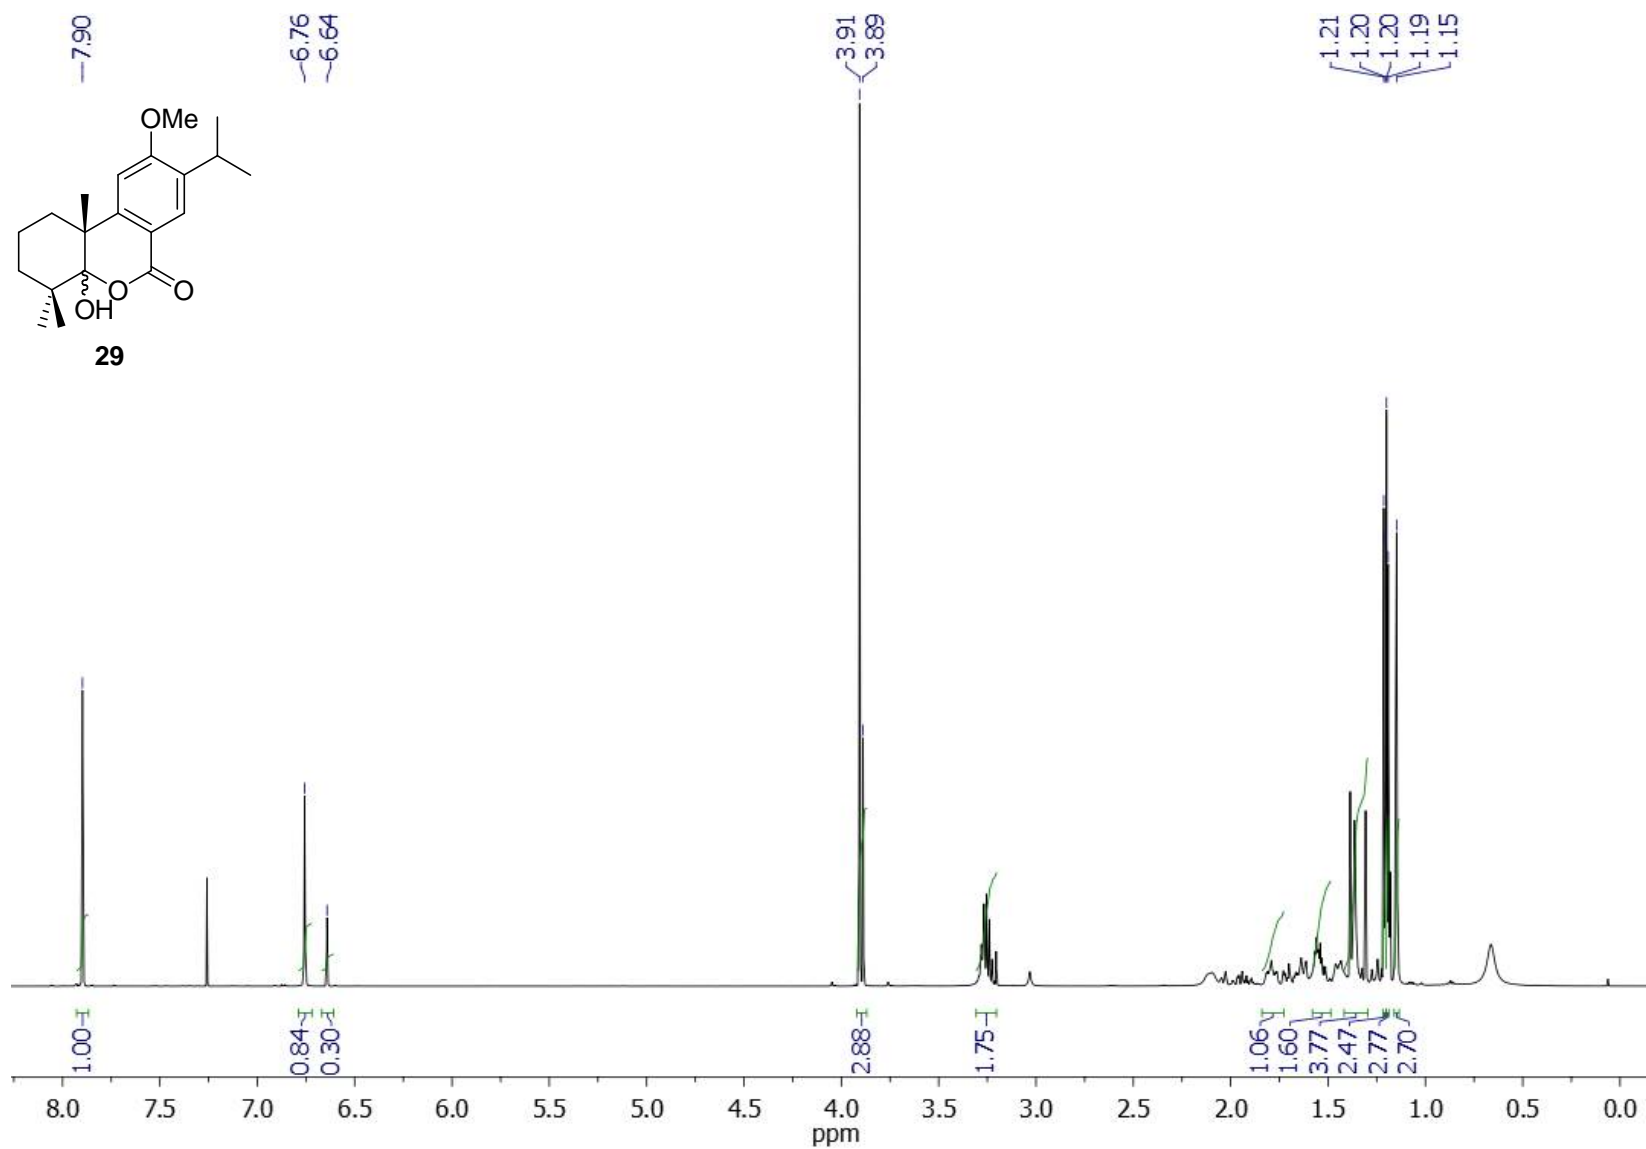

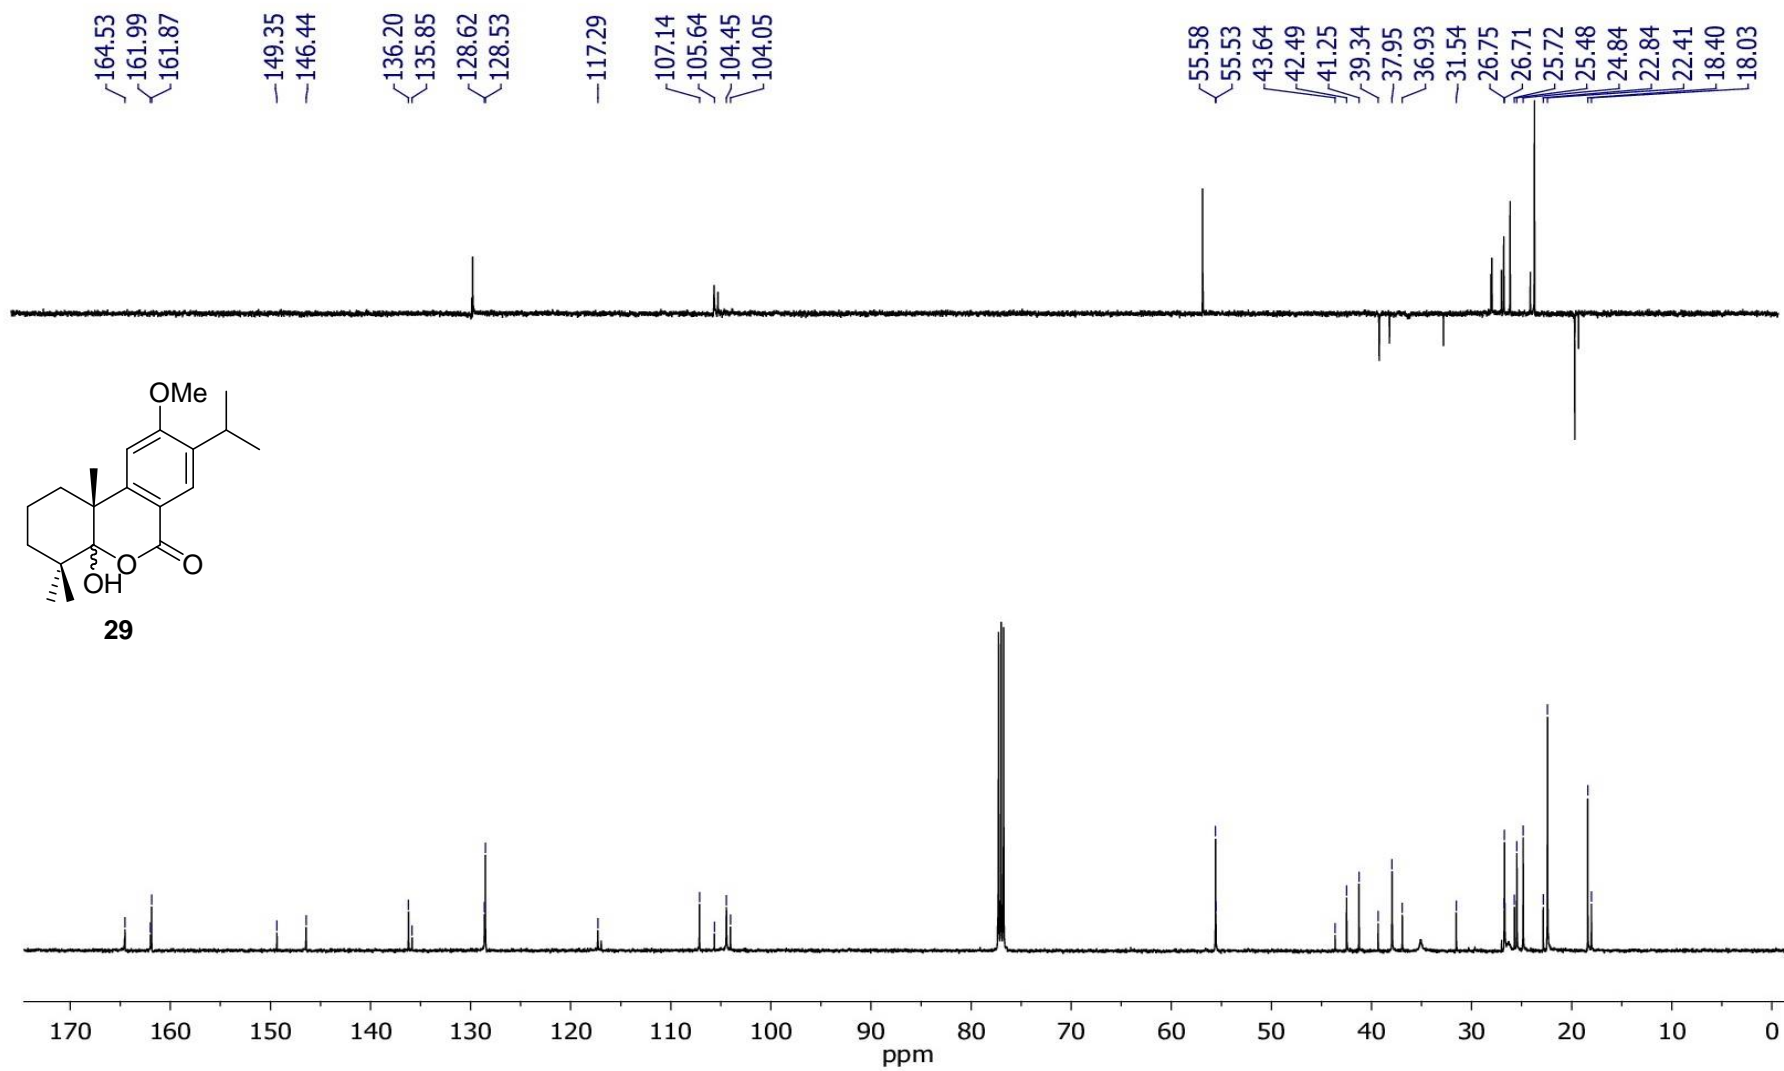

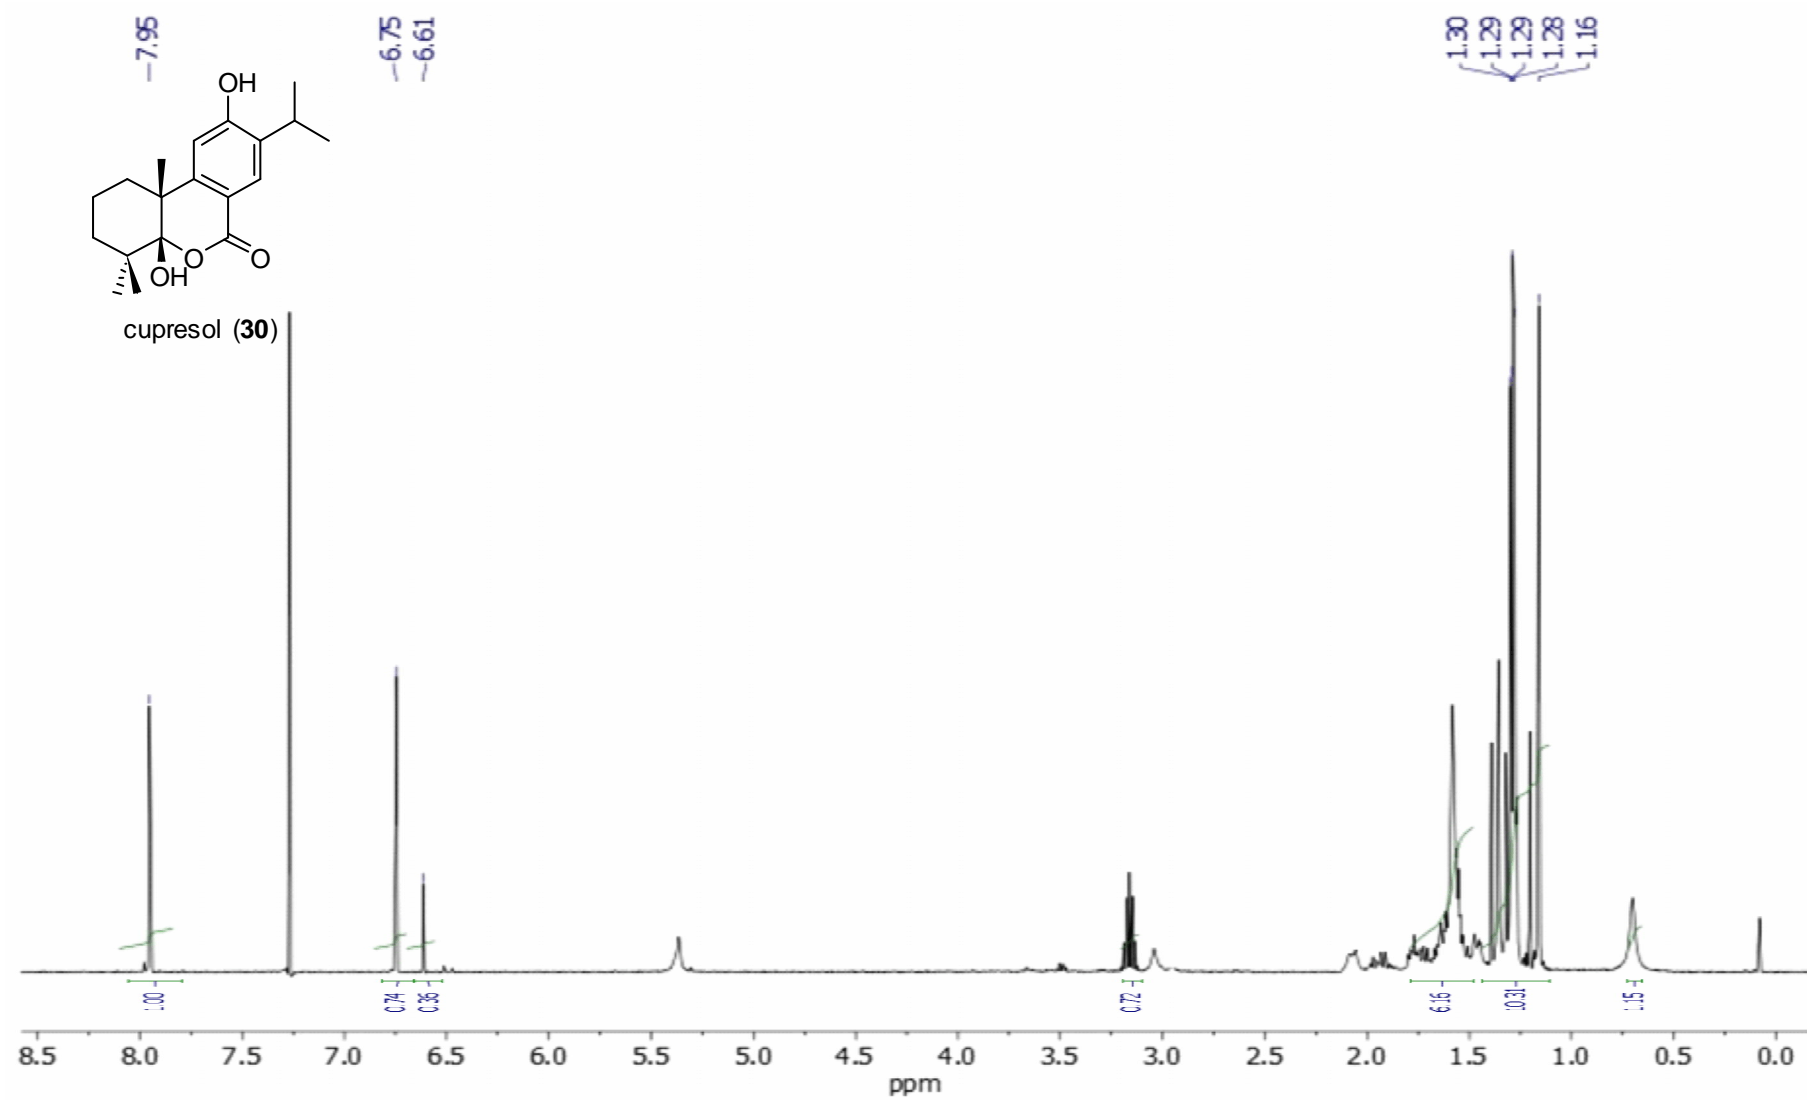

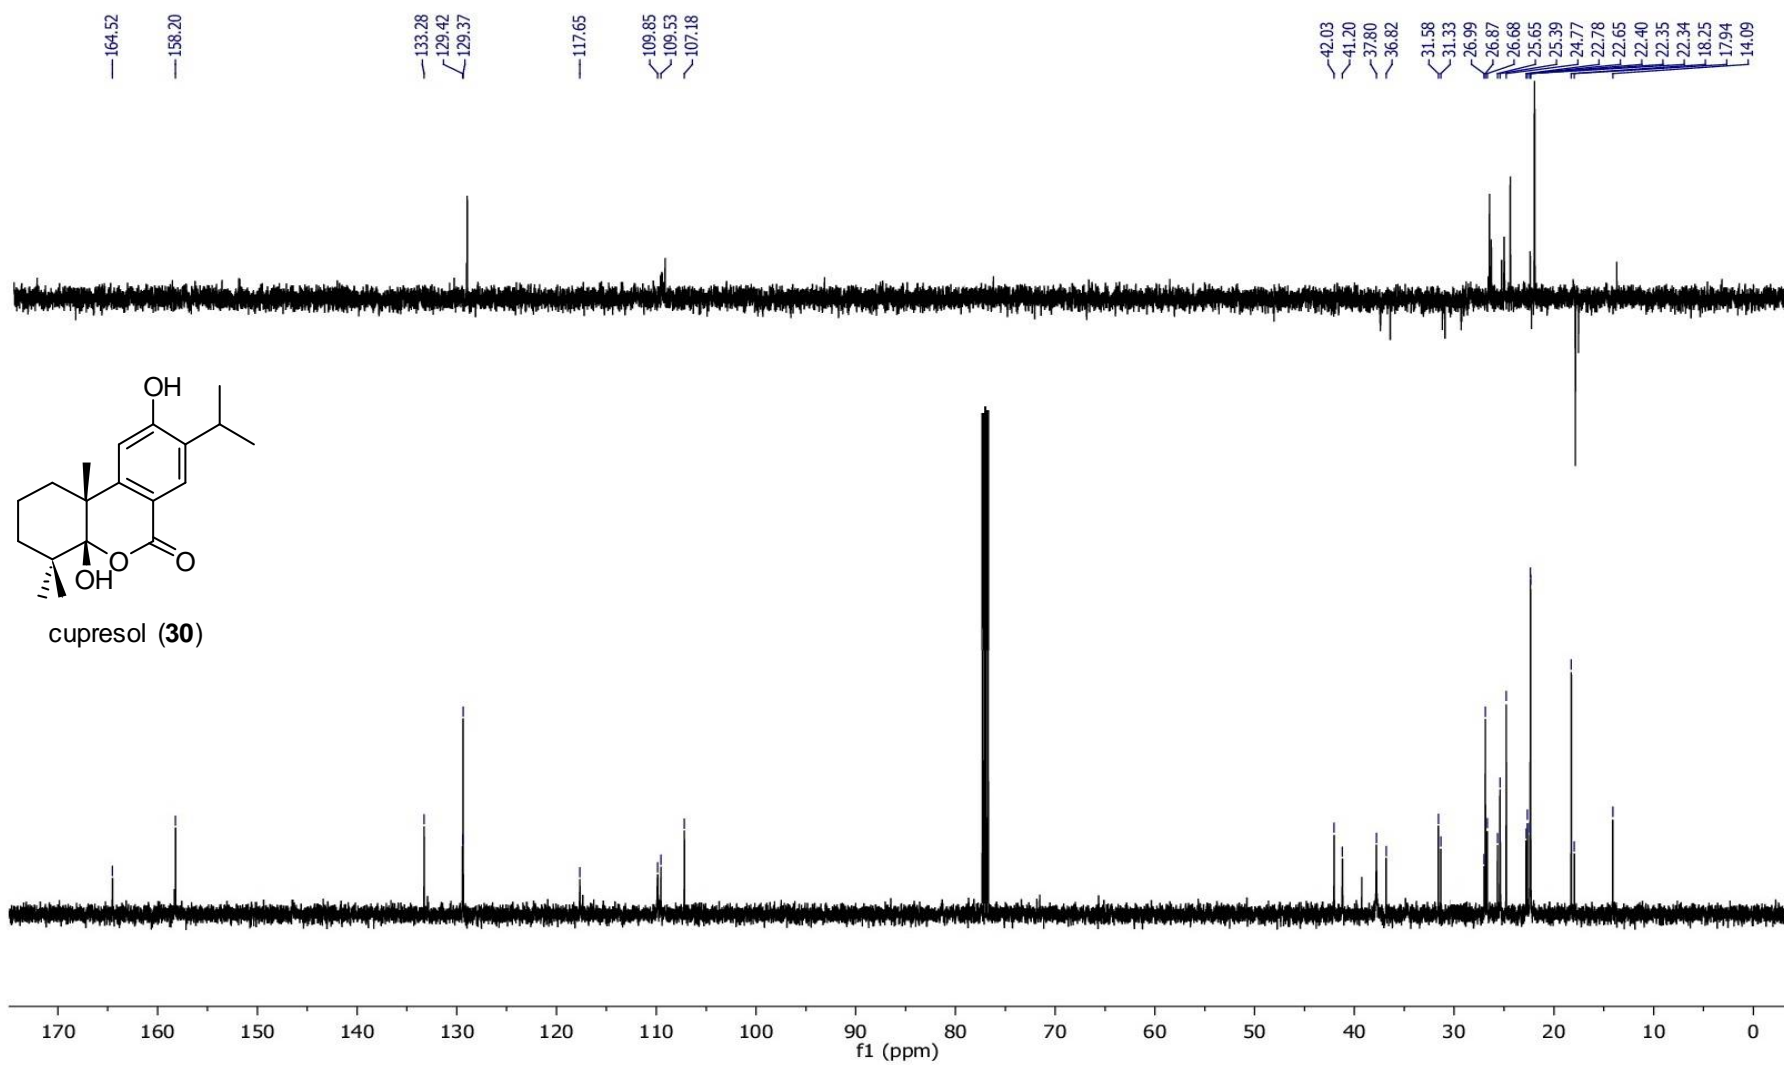

Supplement: s1 [file s1]
